1 Time elapsed between Zika and dengue virus type 2 infections alters the magnitude of antibody  
2 and T cell responses but not viremia in rhesus macaques

3

4 Erick X. Pérez-Guzmán<sup>1#</sup>, Petraleigh Pantoja<sup>1,2</sup>, Crisanta Serrano-Collazo<sup>1</sup>, Mariah A. Hassert<sup>3</sup>,  
5 Alexandra Ortiz-Rosa<sup>4</sup>, Idia V. Rodríguez<sup>2</sup>, Luis Giavedoni<sup>5</sup>, Vida Hodara<sup>5</sup>, Laura Parodi<sup>5</sup>,  
6 Lorna Cruz<sup>1,2</sup>, Teresa Arana<sup>1,2</sup>, Laura J. White<sup>6</sup>, Melween I. Martínez<sup>1,2</sup>, Daniela Weiskopf<sup>7</sup>,  
7 James D. Brien<sup>3</sup>, Aravinda de Silva<sup>6</sup>, Amelia K. Pinto<sup>3</sup> & Carlos A. Sariol<sup>1,2,8\*</sup>

8

9 <sup>1</sup> Department of Microbiology and Medical Zoology, University of Puerto Rico-Medical Sciences  
10 Campus, San Juan, Puerto Rico, United States of America. <sup>2</sup> Unit of Comparative Medicine,  
11 Caribbean Primate Research Center and Animal Resources Center, University of Puerto Rico-  
12 Medical Sciences Campus, San Juan, Puerto Rico, United States of America. <sup>3</sup> Department of  
13 Molecular Microbiology & Immunology, Saint Louis University School of Medicine, Saint Louis,  
14 Missouri, United States of America. <sup>4</sup> Department of Biology, University of Puerto Rico-Río  
15 Piedras Campus, San Juan, Puerto Rico, United States of America. <sup>5</sup> Texas Biomedical Research  
16 Institute, San Antonio, Texas, United States of America. <sup>6</sup> Departments of Microbiology &  
17 Immunology, University of North Carolina-Chapel Hill, North Carolina, United States of America.  
18 <sup>7</sup> Division of Vaccine Discovery, La Jolla Institute for Immunology, La Jolla, California, United  
19 States of America. <sup>8</sup> Department of Internal Medicine, University of Puerto Rico-Medical Sciences  
20 Campus, San Juan 00936, Puerto Rico, United States of America. # Current Address: Takeda  
21 Vaccines Inc, Cambridge, Massachusetts, United States of America.

22

23

24 **Short Title:** Longevity of Zika immunity modulates dengue infection

25 **Keywords:** Zika, dengue, immunity, macaques

26 **\*Corresponding author:** Carlos A. Sariol

27 [carlos.sariol@upr.edu](mailto:carlos.sariol@upr.edu)

28

29

30

31

32

33 **Abstract**

34

35 The role of a previous Zika virus (ZIKV) immunity on subsequent dengue virus (DENV) infections  
36 is poorly understood. This is relevant to anticipate the dynamics of forthcoming DENV epidemics  
37 in areas with previous ZIKV exposure. It is still uncertain if the immunity conferred by the recent  
38 ZIKV epidemic may contribute to protection or worsening DENV cases severity. Accordingly, we  
39 have studied the effect of ZIKV infection with various strains on subsequent DENV immune  
40 response after 10 and 2 months of ZIKV infection. Our results in non-human primates showed  
41 that a subsequent DENV infection in animals with early- and middle-convalescent periods to ZIKV  
42 do not promote an increase in DENV viremia nor pro-inflammatory status. We found that previous  
43 ZIKV exposure increases the magnitude of the antibody and cell-mediated immune responses  
44 against DENV and that the different time intervals between infections alter the magnitude and  
45 durability of such responses—more after longer ZIKV pre-exposure. Furthermore, our data  
46 suggest that the elicited immune modulation between both ZIKV-immune groups after DENV  
47 infection are more influenced by the time elapsed between ZIKV and DENV infections and the  
48 maturation of the cross-reactive immune memory, rather than a possible effect due to ZIKV strain  
49 variation. Collectively, we found no evidence of a detrimental effect of ZIKV immunity in a  
50 subsequent DENV infection regardless the period of time between infections tested on this work.  
51 This supports the implementation of ZIKV vaccines that could also boost immunity against future  
52 DENV epidemics.

53

54

55

56

57

58

59

60

61

62

63 Zika virus (ZIKV) is a re-emerging mosquito-borne *Flavivirus* that has captivated the  
64 attention of the scientific community by its explosive spread in The Americas<sup>1</sup>, and severe  
65 neurological sequelae following infection<sup>2-5</sup>. ZIKV established itself in tropical and sub-tropical  
66 regions that are endemic to other closely-related flaviviruses such as dengue virus (DENV). Both  
67 viruses belong to the Flaviviridae family and are transmitted by *Aedes spp.* mosquitoes. DENV is  
68 a global public health threat, having two-thirds of world's population at risk of infection, causing  
69 ~390 million infections annually<sup>6,7</sup>. DENV exists as four genetically similar but antigenically  
70 different serotypes (DENV1-4)<sup>8</sup>. Exposure to one DENV serotype confers long-lived immunity  
71 against a homotypic secondary infection. However, secondary infection with a heterologous  
72 serotype of DENV is the major risk factor to induce severe DENV disease<sup>9-11</sup>.

73 Due to the established history regarding the influence of cross-reactive immune  
74 interactions in dictating disease outcomes during heterologous infection and the genetic and  
75 consequently antigenic similarities between DENV and ZIKV, concerns have been raised  
76 regarding the impact of DENV-ZIKV cross-reactive immunity on the development of severe clinical  
77 manifestations<sup>12,13</sup>. In the last few years, multiple studies have aimed to understand the role of a  
78 prior DENV exposure in the outcome of ZIKV infection. It has been demonstrated that DENV-  
79 immune sera from humans can enhance ZIKV infection *in vitro*<sup>14,15</sup>, and *in vivo* in immune-deficient  
80 mouse models<sup>16</sup>. However, recent results from our group and others have shown that previous  
81 flavivirus exposure—including DENV—may have no detrimental impact on ZIKV infection *in vivo*  
82 in non-human primates (NHP)<sup>17,18</sup> and humans<sup>19</sup>. Moreover, these studies and others suggest  
83 that previous DENV immunity may play a protective role during ZIKV infection involving humoral  
84 and cellular responses<sup>20-24</sup>. On the other hand, little is known about the opposite scenario, the role  
85 of a previous ZIKV exposure on a subsequent DENV infection, which is relevant to anticipate the  
86 dynamics of forthcoming DENV epidemics.

87 The recent ZIKV epidemic in the Americas resulted in the development of a herd immunity  
88 that may have an impact in subsequent infections with other actively circulating flaviviruses such  
89 as DENV. Thus, human sub-populations such as newborns, international travelers from non-  
90 flavivirus endemic areas or DENV-naïve subjects could be exposed to a ZIKV infection prior to  
91 DENV—since DENV declined in the Americas during ZIKV epidemic<sup>25</sup>. After the epidemic, herd  
92 immunity reduced ZIKV transmission and DENV will re-emerge and potentially infect these DENV-  
93 naïve ZIKV-immune sub-populations in The Americas or potentially in other geographic areas  
94 newly at risk<sup>26,27</sup>. An epidemiological study based on active DENV surveillance in Salvador, Brazil,  
95 suggests that the reduction of DENV cases after the ZIKV epidemic is due to protection from  
96 cross-reactive immune responses between these viruses<sup>28</sup>. Prospective experimental studies are

97 needed to confirm this hypothesis. For this purpose, we propose the use of NHPs as a suitable  
98 model. NHPs provide advantages such as an immune response comparable to humans, and the  
99 normalization of age, sex, injection route, viral inoculum and timing of infection<sup>29</sup>. Although clinical  
100 manifestations by flaviviral infections are limited in NHPs<sup>30</sup>, they have been widely used as an  
101 advanced animal model for the study of DENV and ZIKV immune response, pathogenesis, and  
102 vaccine development<sup>17,18,29,31-34</sup>.

103 ZIKV antibodies (Abs) are capable of enhancing DENV infection *in vitro*<sup>35</sup>.  
104 Characterization of the specificity of DENV and ZIKV cross-reactive response revealed that ZIKV  
105 monoclonal Abs and maternally acquired ZIKV Abs can increase DENV severity and viral burden  
106 in immune-deficient mouse models<sup>36,37</sup>. However, little evidence is available concerning this  
107 phenomenon occurring *in vivo* in immuno-competent large animal models such as NHPs. *George*  
108 *et al.*, showed that an early convalescence to ZIKV induced a significant higher peak of DENV  
109 viremia and a pro-inflammatory profile compared to ZIKV-naïve status in rhesus macaques<sup>38</sup>.  
110 Further characterization of ZIKV early convalescent sera from these macaques indicated a  
111 delayed induction of the cross-reactive Ab response against DENV, supporting no cross-  
112 protection against the outcome of DENV infection<sup>39</sup>. A recent NHPs study showed that clinical  
113 and laboratory parameters of ZIKV-immune animals were not associated with an enhancement  
114 of DENV-2 infection. However, a higher peak of DENV-2 plasma RNAemia in ZIKV-immune  
115 animals was observed compared to DENV-2 serum RNAemia loads in control animals, but the  
116 use of different sample types may account for these differences<sup>40</sup>. Despite these findings, further  
117 studies are needed to dissect the complementary role of the innate, humoral and cellular immune  
118 response to mechanistically explain these findings. Particularly, there is no evidence of the  
119 modulation and functionality of the T cell immune response in the ZIKV-DENV scenario. Available  
120 studies rely upon pathogenesis and antibody studies, but there is no documented evidence as to  
121 whether cell-mediated immunity (CMI)—specifically the functional response of T cells—is  
122 modulated in a subsequent DENV infection by the presence of ZIKV immune memory.

123 The time interval between primary and secondary DENV infections have been shown to  
124 be an important predictor for the development of severe clinical outcomes in humans<sup>10</sup>. Shorter  
125 time interval between DENV infections result in a subclinical secondary infection, while  
126 symptomatic secondary infections and severe DENV cases have been related with longer periods  
127 between infections<sup>41-44</sup>. These findings suggest that high titers of cross-reactive Abs play a time-  
128 dependent protective role between heterotypic DENV infections. Despite this evidence from  
129 DENV sequential infections, it remains poorly understood if the same applies to the time interval  
130 between ZIKV-DENV sequential infections. Specifically, how do longer periods of convalescence

131 after ZIKV infection impact the outcome of DENV infection. This scenario will more closely  
132 resemble the epidemiological setting and time intervals elapsed between the current circulation  
133 of related flaviviruses in the Americas. So currently, the role of multiple convalescent periods to  
134 ZIKV in the outcome of DENV and other flavivirus infections is in the forefront of discussions  
135 based on the limited studies available in experimental models and a lack of characterized human  
136 prospective cohorts of this scenario yet<sup>28,45-47</sup>.

137 To address these knowledge gaps, the objective of our study is to investigate the immune  
138 modulatory role of an early- and middle-convalescence after ZIKV infection on the outcome of a  
139 subsequent DENV infection in a NHP model. To test this, NHP cohorts who were ZIKV immune  
140 for 10 months (mid-convalescence), 2 months (early-convalescence) or naïve for ZIKV were  
141 exposed to DENV. The 2 months cohort was selected for direct comparison with previous work in  
142 NHP<sup>38</sup>, while the 10 months cohort was selected based on availability and to test a longer period  
143 of convalescence to ZIKV. In each of these groups we assessed DENV pathogenesis, the elicited  
144 Ab response, and characterized the CMI. Based on our knowledge, this is the first characterization  
145 of CMI with this scenario in NHPs—taking into account the synergistic effect between the Ab and  
146 cell-mediated responses. This study provides evidence that the presence of ZIKV immune  
147 memory contributes to improve the immune response—more efficient after longer ZIKV pre-  
148 exposure—against a DENV infection, without promoting enhancement of DENV viremia nor  
149 inducing higher levels of pro-inflammatory cytokines.

150

## 151 **Results**

152

153 **DENV challenge and clinical status of rhesus macaques.** The experimental design includes  
154 three cohorts of rhesus macaques (*Macaca mulatta*), within the age range considered as young  
155 adults (Supplementary Fig. 1k), that were challenged with DENV-2 (NGC-44 strain), monitored  
156 and bled for three months (Fig. 1). Two cohorts were previously exposed to ZIKV: cohort 1  
157 (ZIKVPPF-10mo) was comprised of 4 animals that had been exposed to ZIKV H/PPF/2013 strain 10  
158 months before DENV-2 challenge (mid-convalescence), and cohort 2 (ZIKVPR-2mo) comprised  
159 of 6 animals that had been exposed to ZIKV PRVABC59 strain two months before DENV-2  
160 challenge (early-convalescence). Both ZIKV strains used for previous exposure of these groups  
161 are >99.99% comparable in amino acid identity (Supplementary Table 1). An additional cohort 3  
162 (Naïve) included four animals naïve to ZIKV/DENV as a control group. After DENV challenge all  
163 macaques were extensively monitored and sample collection was performed at various timepoints  
164 up to 90 days post infection (dpi) for serum and PBMCs isolation.

165 The clinical status was monitored to determine if the presence of ZIKV immunity affected  
166 the clinical outcome of DENV infection. Vital signs such as weight (kg), and temperature (°C) were  
167 monitored. Also, complete blood cell counts (CBC), and comprehensive metabolic panel (CMP)  
168 were performed before (baseline: day 0) and after DENV infection at multiple timepoints (CBC: 0,  
169 7, 15 dpi; CMP: 0, 7, 15, 30 dpi). Neither symptomatic manifestations nor significant differences  
170 in weight or temperature were observed in any of the animals after DENV infection up to 90 dpi  
171 (Supplementary Fig. 1a-b). Likewise, no significant differences between groups were detected in  
172 CBC parameters: white blood cells (WBC), lymphocytes (LYM), neutrophils (NEU), monocytes  
173 (MON), and platelets (PLT) after DENV infection compared to basal levels of each group  
174 (Supplementary Fig. 1c-g). CMP levels showed no differences in alkaline phosphatase and  
175 aspartate transaminase (AST) (Supplementary Fig. 1h-i). Although within the normal range, levels  
176 of alanine transaminase (ALT) were significantly higher in the ZIKVPR-2mo group compared to  
177 its baseline at 7 dpi ( $p=0.0379$ , Two-way Anova Dunnett test), but at 15 and 30 dpi values returned  
178 to baseline levels (Supplementary Fig. 1j). Overall, except for the isolated increase of ALT at 7  
179 dpi in ZIKVPR-2mo, the clinical profile suggests that the presence of ZIKV-immunity did not  
180 significantly influence the clinical outcome of DENV infection.

181  
182 **DENV RNAemia is not enhanced by previous ZIKV immunity.** RNAemia levels in NHPs serum  
183 were quantified by qRT-PCR at baseline, 1 to 10, and 15 dpi to determine if the presence of early-  
184 (ZIKVPR-2mo) or mid-convalescence (ZIKVVF-10mo) to ZIKV alters DENV RNAemia kinetics.  
185 No significant differences between groups were observed in detected levels of DENV genome  
186 copies per ml of serum overtime (Fig. 2a). We noted that in the ZIKVVF-10mo group 3 out of 4  
187 animals were able to keep the RNAemia level below  $10^3$  genome copies the next day after DENV  
188 infection. This group started an early clearance of the RNAemia at 7 dpi, with only 1 out of 4  
189 animals having detectable levels by days 8 and 9 pi. For ZIKVPR-2mo and naïve animals, the  
190 clearance of detectable RNAemia started at 8 dpi, in 4 out of 6 and 1 out of 4 of the animals,  
191 respectively. Naïve animals had the most delayed clearance of RNAemia with at least half of the  
192 animals with detectable levels of viral RNA until day 9 pi. RNAemia was completely resolved in  
193 all animals by 10 dpi. In summary, ZIKVVF-10mo had 7.25, ZIKVPR-2mo 7.5, and naïve animals  
194 8 mean days of detectable RNAemia after DENV infection (Fig. 2b). In addition, the area under  
195 the curve (AUC) was calculated but no statistically significance differences were observed in the  
196 RNAemia peak among groups (Supplementary Fig. 2). However, the AUC trend to be lower in  
197 both ZIKV-immune groups. In terms of the kinetics, a delay in the peak RNAemia set point was  
198 observed in both ZIKV-immune groups (switch from day 2 to days 5 and 6) followed by higher,

199 but non-significant, levels compared to the naïve group, and a subsequent early RNAemia  
200 clearance in both ZIKV-immune groups. Together these results show that, although no statistically  
201 significant differences among groups were observed, previous immunity to ZIKV is not associated  
202 with an increase in DENV RNAemia; even more, a mid-convalescence to ZIKV tended to develop  
203 a shorter viremic period.

204 **Pro-inflammatory cytokines are not exacerbated by the presence of ZIKV immunity.** To  
205 determine if the characterized cytokine profile of an acute DENV infection was modulated by ZIKV  
206 immunity we assessed the serum concentration (pg/ml) of 8 cytokines/chemokines by Luminex  
207 multiplex at baseline, 1, 2, 3, 5, 10, 15 and 30 dpi. The naïve group showed significant higher  
208 levels of Type I interferon alpha (IFN- $\alpha$ ) and pro-inflammatory cytokines such as Interleukin-6 (IL-  
209 6), and monokine induced by IFN-gamma (MIG/CXCL9) (Fig. 3a-c). IFN- $\alpha$  was highest at 5 dpi  
210 (Fig. 3a:  $p < 0.0001$  vs ZIKVPR-10mo and  $p = 0.0003$  vs ZIKVPR-2mo, Two-way Anova Tukey test).  
211 IFN- $\alpha$  has been demonstrated to be involved in the innate anti-viral immunity and elevated levels  
212 are associated with higher viral load and antigen availability. IL-6, a multifunctional cytokine  
213 involved in immune response regulation and many inflammatory reactions showed the highest  
214 levels at 1 dpi in naïve animals (Fig. 3b:  $p = 0.0115$  vs ZIKVPR-10mo and  $p = 0.0185$  vs ZIKVPR-  
215 2mo, Two-way ANOVA Tukey test). Finally, MIG/CXCL9, which is a potent chemoattractant  
216 involved in leucocyte trafficking demonstrated the highest levels at 10 dpi in naïve animals (Fig.  
217 3c:  $p = 0.0004$  vs ZIKVPR-2mo, Two-way Anova Tukey test). On the other hand, the mid-  
218 convalescent ZIKVPR-10mo group showed higher levels of CXCL10 (IP-10) (Fig. 3g) at day 1  
219 ( $p = 0.0198$  vs ZIKVPR-2mo, Two-way Anova Tukey test), 5 ( $p = 0.0487$  vs Naïve, Two-way Anova  
220 Tukey test) and 10 pi ( $p = 0.0009$  vs ZIKVPR-2mo, Two-way Anova Tukey test). CXCL10 is a T  
221 cell-activating chemokine and chemoattractant for many other immune cells. Also, this group  
222 showed higher levels of perforin (Fig. 3h) at day 10 ( $p = 0.0024$  vs Naïve and  $p = 0.0190$  vs ZIKVPR-  
223 2mo, Two-way Anova Tukey test) and 15 pi ( $p = 0.0178$  vs Naïve, Two-way Anova Tukey test).  
224 Perforin is an effector cytolytic protein released by activated cytotoxic CD8+ T cells and natural  
225 killer (NK) cells. No significant differences between groups were observed for other pro-  
226 inflammatory cytokines such as monocyte chemoattractant protein 1 (MCP-1), macrophage  
227 inflammatory protein 1-beta (MIP-1 $\beta$ ) and IL-1 receptor antagonist (IL-1RA) (Fig. 3d-f).  
228 Collectively, these results demonstrate that the presence of ZIKV immunity does not exacerbate  
229 pro-inflammatory status after DENV infection while mid-convalescence immunity to ZIKV  
230 stimulated levels of mediators mainly involved in the activation of cell-mediated immune response.

231

232 **DENV and ZIKV cross-reactive antibody response is boosted by ZIKV immunity and is**  
233 **influenced by the time span of the previous ZIKV infection.** An ELISA-based serological  
234 profile was performed to determine the contribution of ZIKV immunity in the cross-reactive Ab  
235 response before and after DENV infection. We assessed the levels of DENV IgM and IgG, and  
236 cross-reactivity with ZIKV (IgM, IgG, NS1-IgG and EDIII-IgG) at multiple timepoints  
237 (Supplementary Fig. 3). Naïve cohort showed a significant higher peak of IgM (Supplementary  
238 Fig. 3a) characteristic of a primary DENV infection at 15 and 30 dpi ( $p < 0.0001$  vs ZIKVPR-10mo  
239 and  $p = 0.0004$  vs ZIKVPR-2mo,  $p = 0.0044$  vs ZIKVPR-10mo and  $p = 0.0179$  vs ZIKVPR-2mo,  
240 respectively, Two-way Anova Tukey test). This indicates the productive and acute DENV  
241 infection, while ZIKV immune groups showed lower levels of IgM resembling a heterotypic  
242 secondary infection. Total DENV IgG levels (Supplementary Fig. 3b) of both ZIKV-immune groups  
243 were significantly higher compared to naïve since baseline (cross-reactive ZIKV-IgG Abs) and 7,  
244 15, 30, 60 and 90 (the latter for ZIKVPR-10mo only) (ZIKVPR-10mo vs Naïve:  $p = 0.0010$ ,  
245  $p < 0.0001$ ,  $p < 0.0001$ ,  $p < 0.0001$ ,  $p < 0.0001$ ,  $p = 0.0016$ ; ZIKVPR-2mo vs Naïve:  $p = 0.0029$ ,  
246  $p = 0.0002$ ,  $p < 0.0001$ ,  $p < 0.0001$ ,  $p = 0.0006$ ; Two-way Anova Tukey test). The ZIKVPR-10mo group  
247 showed significant higher levels than ZIKVPR-2mo group at 30 and 90 dpi ( $p = 0.0242$  and  
248  $p = 0.0348$ , Two-way Anova Tukey test). Overall, ZIKVPR-10mo developed higher and long-lasting  
249 levels of DENV IgG.

250 In contrast, ZIKV IgM levels were under or near the limit of detection in all groups over  
251 time after DENV infection despite several significant differences between groups (Supplementary  
252 Fig. 3c). ZIKV IgG levels (Supplementary Fig. 3d) were high in both ZIKV-immune groups at  
253 baseline and 7 dpi compared to naïve ( $p < 0.0001$  vs naïve, Two-way Anova Tukey test),  
254 suggesting that although different pre-infecting ZIKV strains, the previous elicited IgG response  
255 against both ZIKV strains is comparable. After DENV infection, an increase of ZIKV IgG was  
256 shown and remain constantly high at 15, 30, 60 and 90 dpi in both ZIKV-immune groups  
257 ( $p < 0.0001$  vs naïve for all timepoints, Two-way Anova Tukey test), suggesting that DENV has the  
258 potential to stimulate ZIKV-binding Ab-producing plasmablasts. In addition, to elucidate the  
259 composition of similar ZIKV IgG levels in ZIKV-immune groups, we measured ZIKV-specific NS1  
260 IgG (Supplementary Fig. 3e) and ZIKV-specific EDIII IgG (Supplementary Fig. 3f) levels. Although  
261 ZIKVPR-2mo showed significant differences compared to naïve at 30, 60 and 90 dpi ( $p < 0.0001$ ,  
262  $p = 0.0001$ ,  $p = 0.0159$ ; Two-way Anova Tukey test), we observed a significantly higher expansion  
263 and long-lasting response of ZIKV NS1-specific Abs in the ZIKVPR-10mo group compared to the  
264 ZIKVPR-2mo group at baseline, 60 and 90 dpi ( $p = 0.0036$ ,  $p = 0.0071$ ,  $p = 0.0294$ ; Two-way Anova  
265 Tukey test) and also compared to naïve animals at all timepoints ( $p < 0.0001$ , Two-way Anova



266 Tukey test). Moreover, higher magnitude of ZIKV-specific EDIII-IgG levels in the ZIKVVPF-10mo  
267 group than in the ZIKVPR-2mo group was observed compared to naïve at baseline (ZIKVVPF-  
268 10mo only), 15, 30 and 60 (ZIKVVPF-10mo vs Naïve:  $p=0.0092$ ,  $p<0.0001$ ,  $p<0.0001$ ,  $p=0.0034$ ;  
269 ZIKVPR-2mo vs Naïve:  $p=0.0003$ ,  $p=0.0014$ ,  $p=0.0055$ ; Two-way Anova Tukey test), suggesting  
270 that a ZIKV mid-convalescence promotes an expansion of higher magnitude of ZIKV EDIII-IgG  
271 Abs from ZIKV memory B cells (MBC). However, those higher cross-reacting levels decrease  
272 overtime as expected. In summary, a boost of DENV and ZIKV Abs is triggered by the presence  
273 of ZIKV immunity and the expansion of specific- and cross-reactive Abs is higher on magnitude  
274 and durability when a mid-convalescence immunity to ZIKV is present.

275

276 **Neutralizing antibody response against DENV-2 and heterologous serotypes is higher in**  
277 **magnitude and durability in presence of mid-convalescence to ZIKV.** Neutralizing antibodies  
278 (NAbs) are essential to combat DENV and ZIKV infection. The maturation and potency of this  
279 response is known to define to a great extent the infection outcome<sup>12,48</sup>. Accordingly, we tested  
280 the neutralization capacity of NAbs in serum from ZIKV-immune and naïve animals before and  
281 after DENV infection, to determine whether an early- or mid-convalescence to ZIKV affected the  
282 NAb response. Plaque Reduction Neutralization Test (PRNT) was performed to elucidate the NAb  
283 titers of all groups against all DENV serotypes and both ZIKV pre-infecting strains. Before  
284 infection with DENV the naïve groups had no detectable NAb levels (<1:20 PRNT60 titers) against  
285 all DENV serotypes, while ZIKV-immune groups showed low cross-NAb titers against DENV-2  
286 and DENV-4 (Fig. 4a). These cross-reactive levels were higher in the ZIKVVPF-10mo group than  
287 in the ZIKVPR-2mo group for both viruses. The peak of high NAb titers occurred at 30 days after  
288 DENV infection for all groups (ZIKVVPF-10mo>ZIKVPR-2mo>Naïve) against all DENV serotypes  
289 (DENV-2>DENV-4>DENV-3>DENV-1) (Fig. 4b). The ZIKVVPF-10mo group neutralized all DENV  
290 serotypes with significant higher potency than naïve animals ( $p<0.0001$ ,  $p=0.0337$ ,  $p<0.0001$ ,  
291  $p<0.0001$  for DENV1-4; Two-way Anova Tukey test) and the ZIKVPR-2mo group, except for  
292 DENV-2, that both ZIKV-immune groups have comparable neutralization magnitude at 30 dpi  
293 ( $p=0.0002$ ,  $p=0.7636$ ,  $p=0.0016$ ,  $p=0.0004$  for DENV1-4; Two-way Anova Tukey test). However,  
294 the neutralization kinetics by sigmoidal response curves suggest higher percent of neutralization  
295 against DENV-2 overtime in the group with mid-convalescence to ZIKV (Supplementary Fig. 4).  
296 On the other hand, the ZIKVPR-2mo group showed significantly higher potency of the NAb  
297 response only against DENV-1 compared to naïve animals ( $p=0.0146$ ; Two-way Anova Tukey  
298 test) (Fig. 4b).

299 In addition, we tested whether the NAb titers that peak at 30 dpi for all groups remain  
300 constant over time (up to 90 dpi) against all DENV serotypes (Fig. 4c-f). In general, the  
301 neutralizing response of the ZIKVPF-10mo maintained higher NAb titers up to 90 dpi compared  
302 to ZIKVPR-2mo and naïve groups. Significant differences between ZIKVPF-10mo and ZIKVPR-  
303 2mo groups were observed against DENV-1,-3 and -4 at day 30 pi ( $p=0.0002$ ,  $p=0.0016$ ,  
304  $p=0.0004$ ; Two-way Anova Tukey test) and at day 60 pi against DENV-2 and DENV-3 ( $p=0.0179$ ,  
305  $p=0.0047$ ; Two-way Anova Tukey test). The neutralizing Ab response of the ZIKVPF-10mo group  
306 was even more significantly higher compared to the naïve group at day 15 (only performed for  
307 the infecting serotype to monitor early neutralizing activity), day 30, 60 and 90 pi against DENV-  
308 2 ( $p=0.0022$ ,  $p=0.0337$ ,  $p=0.0146$ ,  $p=0.0337$ ; Two-way Anova Tukey test); at day 30 pi against  
309 DENV-1 ( $p<0.0001$ , Two-way Anova Tukey test); at day 30 and 60 pi against DENV-3 ( $p<0.0001$ ,  
310 Two-way Anova Tukey test); and at day 30 pi against DENV-4 ( $p<0.0001$ , Two-way Anova Tukey  
311 test). In contrast, the ZIKVPR-2mo group showed a neutralizing Ab response with a magnitude  
312 and long-lasting levels comparable to the naïve group, except at day 15 and 30 pi against DENV-  
313 2 and DENV-1, respectively ( $p=0.0067$ ,  $p=0.0146$ ; Two-way Anova Tukey test). The neutralizing  
314 response was long-lasting in the ZIKVPF-10mo group compared to other groups as supported by  
315 the data from days 30 and 60 p.i. At day 90 pi, although no significant differences were observed  
316 between all groups, the ZIKVPF-10mo group showed a consistent trend to maintain higher NAb  
317 titers against all DENV serotypes indicating a higher and long-lasting breadth of cross-  
318 neutralization within DENV serocomplex.

319 Collectively, these results demonstrate that a mid-convalescence to ZIKV provokes a  
320 boost of the magnitude and durability of the neutralizing response against all DENV serotypes  
321 more effectively than in animals with an early-convalescence to ZIKV, but also higher compared  
322 to a *de novo* DENV-specific NAb response of the naïve animals.

323

324 **ZIKV cross-neutralizing antibody response is strain-independent and higher in magnitude**  
325 **and durability in the presence of mid-convalescence to ZIKV.** Previous exposure to ZIKV  
326 strains in ZIKV-immune groups developed high levels of cross-reactive, non-neutralizing, and  
327 neutralizing Abs before DENV infection (baseline). To determine if this memory Ab response is  
328 strain-specific and if the difference in convalescence period to ZIKV alters the efficacy and  
329 modulation after DENV infection, we assessed the NAb levels in ZIKV-immune (ZIKVPF-10mo  
330 and ZIKVPR-2mo) and ZIKV-naïve serum with both pre-infecting contemporary Asian-lineage  
331 H/PF/2013 and PRVABC59 ZIKV strains at multiple timepoints after DENV infection. At baseline,  
332 both ZIKV-immune groups showed high NAb titers against H/PF/2013 strain, which suggest that

333 irrespective of pre-exposure to different ZIKV strains and different convalescent periods the Ab  
334 response remains similarly effective (Fig. 5a). As early as day 15 after DENV infection, a potent  
335 boost of NAb titers in both ZIKV-immune groups was developed. However, elevated NAb titers  
336 were significantly higher in the ZIKVPR-10mo group compared to the ZIKVPR-2mo and naïve  
337 groups at day 15 pi ( $p=0.0005$ ,  $p<0.0001$ ; Two-way Anova Tukey test) and day 30 pi ( $p=0.0067$ ,  
338  $p=0.0012$ ; Two-way Anova Tukey test). As expected, this elevated ZIKV cross-reactive NAb  
339 levels decreased gradually overtime after 15 dpi in both ZIKV-immune groups. Nevertheless, the  
340 ZIKVPR-10mo group retained higher NAb titers until 90 dpi while the titers of the ZIKVPR-2mo  
341 group returned to baseline levels. Of note, the NAb titers of the naïve group were considered as  
342 negative in all timepoints and failed to neutralize ZIKV throughout DENV infection even at  
343 concentrated levels of the antibodies (Fig. 5a). These results are confirmed by the behavior of  
344 neutralization kinetics by sigmoidal response curves where the ZIKVPR-10mo group retained  
345 elevated magnitude of ZIKV neutralization overtime (Supplementary Fig. 5).

346 To determine if the immune memory induced by different ZIKV strains play a role in the  
347 modulation of the cross-NAb response triggered by a subsequent DENV infection, NAb titers were  
348 measured against both ZIKV strains before and 30 days after DENV infection. The ZIKVPR-10mo  
349 group showed significant higher NAb titers against both ZIKV strains compared to the ZIKVPR-  
350 2mo group before DENV infection ( $p=0.0093$ ,  $p=0.0141$ ; Two-way Anova Tukey test) (Fig. 5b).  
351 Subsequently, DENV infection promote an equally 8-fold increase of NAb titers against both  
352 strains in the ZIKVPR-10mo group, significantly higher than the 4-fold increase in the ZIKVPR-  
353 2mo group ( $p=0.0025$ ,  $p=0.0011$ ; Two-way Anova Tukey test) (Fig. 5c). To rule out that difference  
354 in fitness between both ZIKV strains would bias the magnitude of the NAb after DENV infection  
355 we compared in parallel the NAb titers at 30 and 60 days after ZIKV infection (day 60 correspond  
356 to the baseline of the ZIKVPR-2mo group). No significant differences were observed between  
357 ZIKV-immune groups in the NAb titers induced by both strains at the same timepoints after ZIKV  
358 infection (Supplementary Fig. 6). Altogether, these results demonstrate that DENV infection  
359 results in a significant increase in the magnitude and durability of the cross-neutralizing Ab  
360 response against ZIKV in animals with a mid-convalescent period from ZIKV infection. The elicited  
361 changes in neutralization capacity were likely driven more by the longevity of the immune memory  
362 maturation and the associated memory recall of the ZIKV immunity than by a strict dependency  
363 of the specific pre-exposed ZIKV strain.

364

365 **Frequency, early activation and proliferation of immune cell subsets are modulated by**  
366 **ZIKV immunity.** We performed immunophenotyping by flow cytometry to assess the frequency,

367 early activation and proliferation of multiple immune cell subsets and how these parameters are  
368 affected by the presence of pre-existing immunity to ZIKV on a subsequent DENV infection  
369 (Supplementary Fig. 7, 8, and 9 for gating strategy; Supplementary Table 2 for Ab panel). As part  
370 of the innate immune response, the frequency of dendritic cells (DCs) and natural killer (NK) cells  
371 subpopulations were measured. Plasmacytoid DCs (pDCs: Lin<sup>-</sup>HLA-DR<sup>+</sup>CD123<sup>+</sup>) are known to  
372 respond to viral infection by production of IFN- $\alpha$ , while myeloid DCs (mDCs: Lin<sup>-</sup>HLA-DR<sup>+</sup>CD11c<sup>+</sup>)  
373 interacts with T cells. The frequency of pDCs was not significantly altered by DENV infection in  
374 any group compared to baseline levels (Supplementary Fig. 10a). At day 2 pi we detected a  
375 significant increase of mDCs in the ZIKVPF-10mo group ( $p=0.0082$ ; Two-way Anova Dunnett test)  
376 (Supplementary Fig. 10b). Furthermore, we determined the frequency of NK subpopulations  
377 including: NKCD8, NKCD56, NKp30 and NKp46 (Supplementary Fig. 11). In general, no  
378 differences were detected between baseline and after DENV infection in all groups for all NK  
379 subpopulations and receptor expression with the exception of the ZIKVPR-2mo group that  
380 showed a significant increases in the following subpopulations: NKG2A<sup>+</sup>NKp30 and  
381 NKp30<sup>+</sup>NKp46<sup>+</sup> at 7 dpi ( $p=0.0495$ ,  $p=0.0006$ ; Two-way Anova Dunnett test) and NKp46<sup>+</sup>NKp30<sup>+</sup>  
382 at 7 and 10 dpi ( $p=0.0005$ ,  $p=0.0001$ ; Two-way Anova Dunnett test) (Supplementary Fig. 11j, o,  
383 s).

384 We next investigated cell subsets that are part of the bi-phasic (humoral/cellular) adaptive  
385 immune response such as B (CD20<sup>+</sup>CD3<sup>-</sup>) and T (CD3<sup>+</sup>CD20<sup>-</sup>) cells. No differences were detected  
386 in total B cells between groups following DENV infection compared to baseline levels (Supplementary  
387 Fig. 12a), but ZIKV-immune groups had elevated levels of activated B cells (CD20<sup>+</sup>CD3<sup>-</sup>CD69<sup>+</sup>)  
388 since baseline and a trend to increase these levels more than the naïve group overtime  
389 (Supplementary Fig. 12b). We detected a significant decrease of proliferating B cells (CD20<sup>+</sup>CD3<sup>-</sup>  
390 Ki67<sup>+</sup>) in naïve animals at 7 and 10 dpi ( $p=0.0031$ ,  $p=0.0345$ ; Two-way Anova Dunnett test), while  
391 ZIKV-immune groups retained their proliferating levels (Supplementary Fig. 12c). Interestingly, the  
392 ZIKVPF-10mo group showed a significant increase of B cells that were proliferating and activated  
393 simultaneously (CD20<sup>+</sup>CD3<sup>-</sup>CD69<sup>+</sup>Ki67<sup>+</sup>) as early as in day 1 pi ( $p=0.0240$ ; Two-way Anova Dunnett  
394 test) and maintained higher levels up to 10 dpi (Supplementary Fig. 12d). Together, these  
395 phenotyping results of B cells are consistent with the early and boosted production of binding and  
396 neutralizing Abs in the ZIKVPF-10mo group compared to naïve animals. The frequency of total T cells  
397 (CD3<sup>+</sup>CD20<sup>-</sup>) and CD4<sup>+</sup>/CD8<sup>+</sup> T cells subsets, was comparable at all timepoints before and after  
398 DENV infection in all groups of animals (Supplementary Fig. 13a-c).

399 Previous studies have demonstrated that DENV and ZIKV specific CD4<sup>+</sup> and CD8<sup>+</sup> T cells  
400 are enriched in certain memory subsets<sup>24,49</sup>. Thus, we measured whether the early activation of

401 T cell subpopulations, such as effector memory ( $CD3^+CD4^+CD28^-CD95^+$ ) and central memory  
402 ( $CD3^+CD4^+CD28^+CD95^+$ ) T cells (T-EM and T-CM), within each T cell compartment was  
403 modulated following DENV infection in presence or absence of convalescence to ZIKV (Fig. 6,  
404 and Supplementary Fig. 7 for gating strategy). The ZIKVPR-10mo group showed significant higher  
405 frequency of activated  $CD4^+$  and  $CD8^+$  T-EM ( $CD3^+CD4^+CD28^-CD95^+CD69^+$  and  
406  $CD3^+CD8^+CD28^-CD95^+CD69^+$ ) following DENV infection compared to basal levels ( $CD4^+$  T-EM  
407 at 7 and 10 dpi:  $p=0.0001$ ,  $p=0.0072$ ;  $CD8^+$  T-EM at 2 and 7 dpi:  $p=0.0291$ ,  $p=0.0001$ ; Two-way  
408 Anova Dunnett test) (Fig. 6a, d). Interestingly, the ZIKVPR-2mo group showed a very limited  
409 frequency and activation of the  $CD4^+$  and  $CD8^+$  T-EM compared to the ZIKVPR-10mo and naïve  
410 groups. However, this group with an early convalescent period to ZIKV, contrary to the other two  
411 groups, showed a very limited but significant activation of  $CD8^+$  T-CM  
412 ( $CD3^+CD8^+CD28^+CD95^+CD69^+$ ) at day 7 and 10 pi ( $p=0.0007$ ,  $p=0.0147$ ; Two-way Anova  
413 Dunnett test) (Fig. 6e). In contrast, naïve animals did not show any significant activation of these  
414 memory cell subsets after DENV infection. Collectively, these results suggest that following DENV  
415 infection: (i) animals with a mid-convalescence ZIKV immunity have a more dynamic B cell  
416 response and are able to rapidly produce more activated effector memory T cells from both T cell  
417 compartments; (ii) animals with an early-convalescence to ZIKV induced activation of central  
418 memory T cells in the  $CD8^+$  compartment with a very limited T-EM frequency and activation profile  
419 compatible with a contraction phase of the T cells compartments; (iii) and animals without  
420 previous exposure to ZIKV exhibited a limited B cell response and minimal modulation of memory  
421 T cell subpopulations at early timepoints as the ZIKV-immune groups.

422

423 **T cell functional effector response against DENV and ZIKV is shaped by the longevity of**  
424 **ZIKV-immunity.** To further characterize the cross-reactive T cell response, we investigated if  
425 different convalescent periods of ZIKV immunity impacted the outcome of the effector role of  $CD4^+$   
426 and  $CD8^+$  T cells following DENV infection. PBMCs were isolated and stimulated with peptide  
427 pools from DENV and ZIKV envelope (E) proteins and from ZIKV non-structural proteins (ZIKV-  
428 NS) (Supplementary Table 4 for peptide sequences). Then, intracellular cytokine staining using  
429 flow cytometry analysis (Supplementary Fig. 14 for gating strategy; Supplementary Table 3 for  
430 Ab panel) was performed to quantify the production of effector immune markers such as the  
431 cytotoxic marker CD107a, IFN- $\gamma$ , and TNF- $\alpha$  by  $CD4^+$  and  $CD8^+$  T cells at baseline, 30, 60, and  
432 90 days after DENV infection (Fig. 7).

433 To assess the ZIKV-primed specific- or cross-reactive effector T cell response we studied  
434 the response against ZIKV or DENV stimuli before DENV infection. In general, before DENV

435 infection, we found that the ZIKV-primed effector T cell response was higher in CD8<sup>+</sup> (Fig. 7m, q,  
436 u) than in CD4<sup>+</sup> (Fig 7a, e, i) T cells. Of note, significant higher levels of CD107a, INF- $\gamma$  and TNF- $\alpha$   
437  $\alpha$  producing CD8<sup>+</sup> T cells were found only in the ZIKVPR-10mo group before DENV infection  
438 (ZIKVPR-10mo vs ZIKVPR-2mo for CD107a:  $p=0.0002$ ; ZIKVPR-10mo vs Naïve for CD107a:  
439  $p=0.0401$ ; ZIKVPR-10mo vs ZIKVPR-2mo for INF- $\gamma$ :  $p=0.0020$ ; ZIKVPR-10mo vs ZIKVPR-2mo  
440 for TNF- $\alpha$ :  $p=0.0033$ ; ZIKVPR-10mo vs Naïve for TNF- $\alpha$ :  $p=0.0354$ ; Two-way Anova Tukey test)  
441 (Fig. 7m, q, u). This basal effector response of CD8<sup>+</sup> T cells in the ZIKVPR-10mo group is  
442 predominated by cross-reactive CD8<sup>+</sup> T cells against DENV E protein. Very low effector T cell  
443 response against ZIKV NS proteins was detected for all groups (ZIKVPR-10mo>ZIKVPR-  
444 2mo>Naïve). In summary, results of T cell functional response before DENV infection suggest  
445 that a mid-convalescence to ZIKV provoke a higher CD8<sup>+</sup> T cell effector response capable to  
446 cross-react efficiently with DENV E protein.

447 After DENV infection, we were able to determine the modulation of the ZIKV-primed  
448 effector CD4<sup>+</sup> and CD8<sup>+</sup> T cell responses of ZIKV-immune groups and the *de novo* response of  
449 ZIKV-naïve animals. The ZIKVPR-10mo and naïve groups significantly boosted their CD107a  
450 expression in both T cell compartments stimulated mainly by DENV E protein at 30 and up to 90  
451 days after DENV infection (CD4<sup>+</sup> T cells: ZIKVPR-10mo vs ZIKVPR-2mo:  $p<0.0001$  at 30 dpi,  
452  $p<0.0001$  at 60 dpi; Naïve vs ZIKVPR-2mo:  $p<0.0001$  at 30 dpi,  $p=0.0018$  at 60 dpi; ZIKVPR-  
453 10mo vs Naïve:  $p=0.0204$  at 30 dpi. CD8<sup>+</sup> T cells: ZIKVPR-10mo vs ZIKVPR-2mo:  $p<0.0001$  at  
454 30 dpi,  $p<0.0001$  at 60 dpi,  $p=0.0008$  at 90 dpi; Naïve vs ZIKVPR-2mo:  $p=0.0039$  at 30 dpi,  
455  $p<0.0001$  at 60 dpi;  $p=0.0081$  at 90 dpi; ZIKVPR-10mo vs Naïve:  $p=0.0194$  at 30 dpi; Two-way  
456 Anova Tukey test) (Fig. 7b, c, n, o, p). Also, these groups boosted the CD107a cytotoxic signature  
457 reacting against ZIKV E and NS proteins by cross-reactive CD4<sup>+</sup> T cells 30 days after DENV  
458 infection (ZIKVPR-10mo vs ZIKVPR-2mo:  $p=0.0025$  for ZIKV E,  $p<0.0001$  for ZIKV NS; Naïve vs  
459 ZIKVPR-2mo:  $p=0.0025$  for ZIKV E,  $p=0.0002$  for ZIKV NS; Two-way Anova Tukey test) (Fig. 7b).

460 The ZIKVPR-10mo group showed a remarkable significant increase of the IFN- $\gamma$ -  
461 producing CD4<sup>+</sup> T cells against DENV E protein since 60 dpi and is maintained up to 90 dpi  
462 compared to other groups (ZIKVPR-10mo vs ZIKVPR-2mo at 60 and 90 dpi:  $p<0.0001$ ,  $p=0.0024$ ;  
463 ZIKVPR-10mo vs Naïve at 60 and 90 dpi:  $p<0.0001$ ,  $p=0.0037$ ; Two-way Anova Tukey test) (Fig.  
464 7g, h), and was the only group with significant increase in the IFN- $\gamma$  producing CD8<sup>+</sup> T cell  
465 compartment at 60 dpi (ZIKVPR-10mo vs ZIKVPR-2mo:  $p=0.0253$ ; Two-way Anova Tukey test)  
466 (Fig. 7s). On the other hand, the ZIKVPR-2mo group exhibited a significant increase of IFN- $\gamma$   
467 producing CD4<sup>+</sup> T cells earlier than other groups at 30 dpi (ZIKVPR-2mo vs ZIKVPR-10mo:  
468  $p<0.0001$ ; ZIKVPR-2mo vs Naïve: Two-way Anova Tukey test) (Fig. 7f). Interestingly, the naïve

469 group showed an increase of cross-reactive TNF- $\alpha$  producing CD4<sup>+</sup> T cells against ZIKV NS  
470 proteins 30 days after DENV infection (Naïve vs ZIKVPR-2mo:  $p=0.0359$ ; Two-way Anova Tukey  
471 test) (Fig. 7j). The ZIKVPR-10mo group developed a significant effector T cell response by TNF-  
472  $\alpha$  producing CD4<sup>+</sup> T cells against DENV and ZIKV E proteins at 60 days after DENV infection  
473 (ZIKVPR-10mo vs ZIKVPR-2mo against DENV/ZIKV E protein:  $p=0.0163$ ,  $p=0.0172$ ; Two-way  
474 Anova Tukey test) (Fig. 7k). Although all groups showed a boosted TNF- $\alpha$  effector response in  
475 the CD8<sup>+</sup> T cell compartment up to 90 days after DENV infection, no significant differences  
476 between groups were observed.

477 Collectively, these results after DENV infection suggest that a mid-convalescence to ZIKV  
478 translate in a more complete functional T cell response characterized by: (i) a cytotoxic CD107a<sup>+</sup>  
479 phenotype directed to DENV E protein for both T cell compartments comparable to the DENV-  
480 specific *de novo* response of the naïve group, (ii) developed CD107a, IFN- $\gamma$  and TNF- $\alpha$  producing  
481 CD8<sup>+</sup> T cell effector response that cross-react efficiently with DENV E protein since baseline and  
482 is boosted after DENV infection, (iii) and promoted the higher T cell effector response against  
483 ZIKV NS proteins. An early-convalescence to ZIKV results in (iv) a very limited cytotoxic activity  
484 (limited expression of CD107a marker) which is in line with a very limited activation of the T-EM,  
485 and with failed capability to react efficiently against E or NS proteins. The ZIKV-naïve group  
486 response was characterized by: (v) production of a DENV-specific *de novo* functional T cell  
487 response with similar magnitude between both T cell compartments, (vi) capable to cross-react  
488 against ZIKV E and NS proteins, (vii) and able to mount a DENV-specific cytotoxic CD107a<sup>+</sup>  
489 phenotype.

490

## 491 Discussion

492 We found that previous infection to ZIKV modulates the immune response against  
493 subsequent DENV infection without an enhancement of DENV viremia nor pro-inflammatory  
494 status, and that this modulation is influenced by the longevity of ZIKV convalescence—more after  
495 longer ZIKV pre-exposure. The aftermath of the recent ZIKV epidemic has been related to a  
496 remarkable decrease in DENV cases in Brazil<sup>28</sup>, and also in most of Latin American and  
497 Caribbean countries ([http://www.paho.org/data/index.php/es/temas/indicadores-  
498 dengue/dengue-nacional/9-dengue-pais-ano.html?start=2](http://www.paho.org/data/index.php/es/temas/indicadores-dengue/dengue-nacional/9-dengue-pais-ano.html?start=2))<sup>25</sup>. Yet, little is known about the role of  
499 previous ZIKV immunity in the outcome of a subsequent DENV infection in human populations,  
500 and if ZIKV immunity is supporting this epidemiological phenomenon observed post-ZIKV  
501 epidemic<sup>28</sup>. To evaluate the hypothesis of a potential ZIKV-DENV cross-protection in humans  
502 characterizing the immunological history of prospective cohorts<sup>47</sup> will be necessary, but human

503 samples for this purpose are scarce yet. Because of this, NHPs are key to provide knowledge  
504 and anticipate different immunological scenarios when DENV epidemics re-emerge in human  
505 populations with previous immunity to ZIKV.

506 Animals with pre-existing ZIKV immunity do not show an enhancement of DENV-induced  
507 RNAemia, regardless of the period of convalescence from previous ZIKV infection (10 or 2  
508 months) and different pre-infecting ZIKV strains. Previous ZIKV immunity is associated with a  
509 trend of less RNAemia days during subsequent DENV infection. This effect is more evident in  
510 animals with a ZIKV convalescence period of 10 months. Previous work reported that a period of  
511 early-convalescence (56 days) to ZIKV (PRVABC59 strain) in rhesus macaques was associated  
512 with a significant increase of DENV-2 RNAemia at day 5 after DENV infection and a pro-  
513 inflammatory cytokine profile. However, very similar to our results, it was noteworthy a delay at  
514 early timepoints and an early clearance in late timepoints of the DENV-2 RNAemia in ZIKV-  
515 immune macaques in comparison to the naïve ones<sup>38</sup>. The lack of significant DENV RNAemia  
516 enhancement found in the group with the early-convalescence period in our work, compared to  
517 previous results<sup>38</sup>, may be attributable to the different sample types collected (plasma vs serum),  
518 or different DENV-2 strains used for the challenge [New Guinea/1944 strain vs  
519 Thailand/16681/1964 strain, from Asian II and Asian I Genotype, respectively]. This fact is of  
520 relevance because it suggests that the effect of previous ZIKV immunity on a subsequent DENV  
521 infection may differ between DENV serotypes or even within genotypes. Another possible  
522 explanation is the genetic heterogeneity of rhesus macaques used in these two studies as they  
523 are derived from different breeders. The importance of selecting genetic well-characterized  
524 macaques have been discussed previously<sup>50</sup>.

525 Due to limited availability of ZIKV-immune cohorts we used animals infected with two  
526 different ZIKV strains for our subsequent challenge with DENV-2. However, extensive revision of  
527 the literature up to date reveals a broad consensus that these two contemporary ZIKV strains  
528 behave very similar from an antigenic point of view<sup>12,51-53</sup>. Our results are confirmatory of those  
529 results showing that both ZIKV strains were neutralized with same efficacy by serum within each  
530 ZIKV-convalescent group, explained by the broadly neutralization activity against multiple ZIKV  
531 strains irrespective of the infecting strain<sup>52</sup>. However, the magnitude of the neutralization of both  
532 strains was statistically higher in animals exposed to DENV 10 months (mid-convalescence) after  
533 ZIKV infection compared to the animals with a shorter ZIKV convalescence (2 months). These  
534 results suggest that the differences in the neutralization profile between the two ZIKV-immune  
535 groups are associated to the longevity of ZIKV convalescence which may be attributable to the  
536 maturation of the cross-reactive immune memory elicited by the heterologous DENV infection and



537 no to the antigenic differences or the different replication capabilities in rhesus macaques of those  
538 two pre-infecting ZIKV strains<sup>17,54</sup>.

539 The period of convalescence further had an impact in the maintenance of the  
540 neutralization magnitude against ZIKV and DENV overtime. We observed a higher activation of  
541 the memory immune response characterized by transiently higher peak levels of serum NAb  
542 against DENVs and ZIKV in ZIKVPR-10mo immune animals compared to ZIKVPR-2mo immune  
543 animals challenged with DENV-2. However, unlike heterologous infections with different DENV  
544 serotypes, by 90 days after DENV-2 infection, the naïve and ZIKV-immune animals had similar  
545 levels of DENV-2 NAb. Moreover, in the ZIKV-immune animals, the ZIKV NAb returned to  
546 steady-state levels similarly observed before DENV-2 challenge. Overall, these results  
547 demonstrate that pre-existing ZIKV immunity leads to a transient increase in neutralizing Ab  
548 responses in animals challenged with DENV-2 compared to naïve animals. This is in contrast with  
549 previous findings where ZIKV-convalescent macaques show a lack of an early and delayed  
550 anamnestic response overtime with limited induction of DENV NAb compared to ZIKV-naïve  
551 animals after DENV infection<sup>39</sup>. However, our results show the ability of DENV-2 to activate MBCs  
552 stimulated by the previous ZIKV infection, but this activation is modest and short-lived compared  
553 to the robust and sustained activation of MBCs on secondary DENV infections<sup>11,31,55,56</sup>. It is still  
554 uncertain why the ZIKVPR-10mo animals have a slightly higher peak of Ab response compared  
555 to the ZIKVPR-2mo animals. We speculate this may be caused by modification of MBCs overtime,  
556 so that by 10 months the cells are able to better respond to antigen compared to cells at two  
557 months. After ZIKV infection in human DENV-naïve subjects, the ZIKV/DENV cross-reactive MBC  
558 response increased in magnitude (39% of total MBC proportion) after longer periods of ZIKV  
559 convalescence (~8 months post-ZIKV infection)<sup>57</sup>, similar to the 10 months in the ZIKV mid-  
560 convalescent group that exhibited higher DENV cross-neutralization. Based upon studies of  
561 human monoclonal Abs, plasmablasts response during secondary DENV infection is mainly of  
562 MBC origin, resulting in a mature response characterized by cross-neutralizing Abs *in vitro*<sup>58</sup>.  
563 However, there are very limited studies on how the affinity maturation develops during the initial  
564 viral encounter and whether the affinity of MBCs is modified during a secondary heterologous  
565 infection or as in this work, during a secondary DENV infection following a primary ZIKV infection.  
566 These are seminal contributions to forecast and understand the cross-neutralization capacity of  
567 further heterologous DENV epidemics in the context of previous ZIKV-DENV immunity.  
568 Interestingly, ZIKV-convalescent animals showed some degree of cross-neutralization  
569 against DENV-2 and DENV-4 before DENV infection. This is consistent with our previous results  
570 showing that DENV-naïve ZIKV-infected animals also preferentially neutralized DENV-4 followed

571 by DENV-2 after ZIKV infection<sup>17</sup>. Longitudinal data of cross-neutralization of DENV serotypes in  
572 DENV-naïve ZIKV-infected human subjects showed low cross-neutralization against all DENV  
573 serotypes, but DENV-4 followed by DENV-2 were neutralized more efficiently up to 6 months after  
574 ZIKV infection with comparable basal titers reported here<sup>59</sup>. There is no data yet that delineates  
575 shared cross-neutralizing epitopes between ZIKV and DENV-2/-4, but it is known that DENV-4  
576 genotypic diversity impact the capacity of its neutralization<sup>60</sup>.

577 One factor that plays a critical role in the induction of enhancement and disease severity  
578 is the time elapsed between sequential heterologous DENV infections<sup>10</sup>. At this time, it is unknown  
579 whether this factor plays a role when DENV accounts for a secondary infection following ZIKV.  
580 Based on our previous works<sup>17,54</sup>, it is possible to argue that the sequence of DENV-ZIKV  
581 infections induce a different immunological response—in terms of the neutralization magnitude,  
582 cytokines profile and functionality of the cellular immune response—compared to the ZIKV-DENV  
583 scenario shown here. However, in both scenarios, the role of the time interval between infections  
584 seems to play a critical role in the quality and quantity of the immune response.

585 Early studies of T cells associate their contribution towards immunopathogenesis in DENV  
586 secondary infections explained by the original antigenic sin<sup>61</sup>, but increasing evidence suggest  
587 their protective role during primary and secondary DENV infections<sup>62</sup>. Recently, with the  
588 introduction of ZIKV into The Americas, T cells from DENV immunity are being implicated in  
589 mediating cross-protection against ZIKV<sup>22-24</sup>. We found that animals with a mid-convalescence to  
590 ZIKV developed an early activation of CD4<sup>+</sup> and CD8<sup>+</sup> effector memory T cells after DENV  
591 infection. This early activation has been observed for the opposite scenario in DENV-immune  
592 ZIKV-infected patients<sup>24</sup>. Interestingly, the ZIKV early-convalescent group displays a modest  
593 activation (T-CM>T-EM) early after DENV infection. Since this group was infected with ZIKV only  
594 two months before DENV it is possible that after viral clearance and development of ZIKV-specific  
595 T cell response, the T cell compartments were still under the contraction phase at the time of the  
596 DENV challenge. Yellow fever virus (YFV) and vaccinia virus vaccinations in humans demonstrate  
597 that T cell contraction start as early as approximately one-month post-vaccination and at least for  
598 almost three months is still ongoing<sup>63</sup>. Also, a study shows that re-stimulation using alphavirus  
599 replicons during T cell response contraction does not have significant impact modulating the pre-  
600 existing T cell response<sup>64</sup>.

601 The profile of ZIKV-specific CD8<sup>+</sup> T cells in humans with convalescence to ZIKV is  
602 characterized by the production of IFN- $\gamma$ , and expression of activation and cytotoxic markers<sup>65</sup>.  
603 Presence of sustained levels of IFN- $\gamma$  prior and early after DENV challenge in vaccinees has been  
604 associated with protection against viremia and/or severe disease<sup>66,67</sup>. We observed a similar

605 phenotype of the functional response of CD8<sup>+</sup> T cells prior DENV infection in animals with longer  
606 convalescence to ZIKV. Strikingly, this response recognizes more efficiently peptides from DENV  
607 E protein than from ZIKV E protein. However, ZIKV-specific CD8<sup>+</sup> T cells direct 57% of their  
608 response against structural proteins, which may suggest these cells can recognize conserved  
609 epitopes between ZIKV and DENV structural proteins. Cross-reactivity of T cells between  
610 heterologous flavivirus infections is explained by selective immune recall of memory T cells that  
611 recognize conserved epitopes between DENV and ZIKV<sup>24</sup>, which also has previously been  
612 demonstrated during secondary heterotypic DENV infections<sup>68,69</sup>. In addition, an increased  
613 cytotoxic profile as demonstrated by the higher frequency of CD107a-expressing CD4<sup>+</sup> and CD8<sup>+</sup>  
614 T cells in the ZIKV mid-convalescent group correlates with the synchronously early activation of  
615 CD4<sup>+</sup> and CD8<sup>+</sup> effector memory T cells and elevated levels of perforin release.

616 Higher proportion of IFN- $\gamma$  and TNF- $\alpha$  producing T cells before a secondary heterologous  
617 DENV infection has been associated to a subsequent subclinical outcome<sup>70</sup>. Herein, we observed  
618 that the ZIKV mid-convalescent group had elevated levels of IFN- $\gamma$  and TNF- $\alpha$  producing T cells  
619 since baseline. In this group, DENV infection stimulated a higher frequency of these cells, but  
620 remarkably, also increased highly cross-reactive IFN- $\gamma$ -producing CD4<sup>+</sup> T cells directed to DENV  
621 E, and ZIKV E/NS proteins. A study showed that cross-reactive ZIKV-primed CD4<sup>+</sup> T cells  
622 recognized conserved homologous sequences of other related flaviviruses such as West Nile  
623 virus (WNV), YFV, and of relevance for our study, cross-react with E protein epitopes of all DENV  
624 serotypes<sup>71</sup>. Moreover, IFN- $\gamma$ -producing CD4<sup>+</sup> T cells have a role in providing help to B cells in  
625 DENV antigens presentation to CD4<sup>+</sup> T cells. This interaction produce IFN- $\gamma$  and other immune  
626 mediators that induced B cell activation and subsequent efficient Ab production<sup>72</sup>. Memory CD4<sup>+</sup>  
627 T cells are also required to generate an effective humoral response against ZIKV<sup>73</sup>. Based on  
628 this, the higher proportion of DENV-E-reactive IFN- $\gamma$ -producing CD4<sup>+</sup> T cells may play a role in  
629 the induction of the robust Ab response in the ZIKV mid-convalescent group against ZIKV and all  
630 DENV serotypes. On the other hand, we showed that naïve animals with DENV *de novo* response  
631 did not cross-neutralized ZIKV at all, which state that although similar, antigenic differences are  
632 sufficient to mount predominantly type-specific rather than cross-reactive responses during a  
633 primary infection<sup>51,57</sup>.

634 A lack of ZIKV immunity promoted a more pro-inflammatory profile characterized by  
635 significant elevated levels of IL-6 and MIG/CXCL9. IL-6 has been detected in high levels during  
636 secondary DENV infections in children<sup>74</sup>, and the day patients suffer from shock (DSS)<sup>75</sup> or died  
637 from DHF<sup>76</sup>. MIG/CXCL9 is known to be a risk factor for DENV severity involved in vascular  
638 permeability<sup>77</sup>. Its detection varies between primary and secondary (higher levels) DENV

639 infections<sup>78</sup>, which may explain non-significant peaks within ZIKV-immune groups during a  
640 secondary DENV infection. Interestingly, higher levels of IFN- $\alpha$  were observed in the ZIKV-naïve  
641 animals. This antiviral cytokine is known to be actively produced during acute DENV infection *in*  
642 *vitro* and *in vivo*<sup>79</sup>. Elevated levels have been correlated with severity in DHF patients, and to act  
643 as a marker for elevated DENV replication<sup>80,81</sup>. On the other hand, the presence of a longer ZIKV  
644 convalescence is associated with increased levels of CXCL10 and perforin. CXCL10 is an  
645 immune mediator for T cells proliferation, recruitment of CD4<sup>+</sup> and CD8<sup>+</sup> activated T cells and IFN-  
646  $\gamma$ -producing CD8<sup>+</sup> T cells, required to control DENV infection *in vivo*<sup>82,83</sup>. This correlates with  
647 higher proportion and activation of both T cell compartments and subsequent functional T cell  
648 response against DENV-E-specific peptides in the group with longer convalescence to ZIKV.  
649 Perforin is involved in the cytotoxic degranulation process against virus-infected cells. In DENV  
650 infection, perforin is part of the anti-DENV cytotoxic phenotype of CD8<sup>+</sup> and CD4<sup>+</sup> T cells<sup>49,84</sup>.  
651 Perforin levels were significantly elevated only in the ZIKV mid-convalescent group after DENV  
652 infection. Accordingly, this coincides with a significant activation of CD8<sup>+</sup> and CD4<sup>+</sup> effector  
653 memory T cells, and degranulation functional response of both T cell compartments, suggesting  
654 an enhanced perforin-producing cytotoxic role of T cells in presence of longer convalescence to  
655 ZIKV. Contrary to our findings, a previously published work found that an approximately two  
656 month ZIKV immunity period resulted in an increase of pro-inflammatory cytokines<sup>38</sup>. However, a  
657 differential effect due to the use of different sample types (plasma vs serum) between both studies  
658 cannot be ruled out.

659 One limitation of our study is the utilization of low numbers of animals per group. Additional  
660 studies with a larger number of animals are warranted. However, fundamental and seminal  
661 contributions on ZIKV and ZIKV/DENV interactions have been obtained by using similar limited  
662 number of animals per group<sup>17,18,38,54,85-89</sup>. Another limitation is that our study monitored the  
663 immune response up to 90 days after DENV infection. Additional longitudinal studies are needed  
664 to test the immune response over longer periods of time including subsequent DENV heterotypic  
665 challenges to evaluate the efficacy of the memory recall in cross-protection between serotypes.  
666 Finally, we cannot comment about the likelihood to increase or decrease susceptibility to develop  
667 DHF/DSS in the context of ZIKV immunity since DENV clinical manifestations in NHP models are  
668 limited and are characterized to be subclinical infections<sup>29</sup>.

669 In summary, dissecting our main findings per previous ZIKV-immune status we found that  
670 a ZIKV middle-convalescence: (i) results in shorter DENV viremic period, (ii) lowest pro-  
671 inflammatory status with upregulation of cellular immune response mediators, (iii) robust  
672 neutralizing antibody response higher in magnitude and durability against ZIKV strains and DENV

673 serotypes, (iv) elevated activated and proliferating B cells, (v) early activation of cross-reactive  
674 CD4<sup>+</sup> and CD8<sup>+</sup> effector memory T cells, (v) and a major breadth of functional T cell response.  
675 For ZIKV early-convalescence we demonstrated: (i) average DENV viremic period and no  
676 exacerbation of pro-inflammatory status, (ii) neutralizing antibody response with high magnitude  
677 but less durability against ZIKV strains and DENV serotypes compared to the ZIKV middle-  
678 convalescent group, (iii) early activation of central memory CD8<sup>+</sup> T cells, (iv) and very limited  
679 activation of effector memory T cells. For the ZIKV-naïve group we demonstrated: (i) longer DENV  
680 viremic period and pro-inflammatory status, (ii) a more delayed *de novo* neutralizing antibody  
681 response against DENV serotypes and inability to neutralize ZIKV strains, (iii) a limited B cell  
682 response, (iv) and an overall *de novo* T cell response lower in magnitude and cross-reactivity  
683 compared to ZIKV-immune groups.

684 This study reinforces the usefulness of NHPs as a suitable model to characterize the  
685 immune response elicited by heterologous and consecutive flavivirus infections and to identify  
686 differential modulation of the immune response influenced by the time interval between infections.  
687 This proof-of-concept and other prospective studies of ZIKV/DENV pathogenesis and cross-  
688 immune relationships are urgently needed even as the peak of the ZIKV epidemic has passed as  
689 there is a high probability for ZIKV to establish a sylvatic transmission cycle using neotropical  
690 primates and mosquitoes in the Americas that will sustain ZIKV circulation and potential re-  
691 emergence<sup>90,91</sup>. Our findings of highly cross-reactive response against DENV in presence of  
692 previous ZIKV immunity with no exacerbation of DENV pathogenesis may contribute to explain  
693 the decrease of detected DENV cases after ZIKV epidemic in the Americas. This scenario has  
694 been suggested recently using a fewer number of animals<sup>40</sup>. Furthermore, our data show a  
695 positive scenario that supports the implementation of ZIKV vaccine programs, since it suggests  
696 that a vaccine-acquired ZIKV-immunity will not worsen DENV pathogenesis and may ameliorate  
697 immune response against a subsequent infection with DENV. Similarly, the implementation of  
698 DENV vaccines is also supported in the context of previous ZIKV immunity, since ZIKV  
699 convalescence may boost the vaccine-acquired anamnestic immune response to DENV without  
700 predisposing to an enhanced pathogenesis. However, the selection of the vaccine schedule may  
701 be critical to induce the optimal immune response when more than one doses are planned.

702

## 703 **Methods**

704

705 **Cell lines.** *Aedes albopictus* cells, clone C6/36 (ATCC CRL-1660), whole mosquito larva cells,  
706 were maintained in Dulbecco Minimum Essential Medium (DMEM) (GIBCO, Life Technologies)

707 supplemented with 10% fetal bovine serum (FBS) (Gibco) and 1% Penicillin/Streptomycin (P/S)  
708 (Gibco). C6/36 were used to produce previous ZIKV and DENV viral stocks with high titers in 150-  
709 175 cm<sup>2</sup> cell culture flasks (Eppendorf), and incubated at 33°C and 5% CO<sub>2</sub>. Vero cells, clone 81  
710 (ATCC CCL-81), African green monkey kidney epithelial cells, were maintained with DMEM  
711 supplemented with 10% FBS and 1% of P/S, HEPES, L-glutamine and non-essential amino acids  
712 (NEAA) in 75 cm<sup>2</sup> cell culture flasks, and incubated at 37°C and 5% CO<sub>2</sub>. Vero-81 cells were used  
713 for the cells monolayer in viral titrations by plaque assays and plaque reduction neutralization test  
714 (PRNT) in flat-bottom 24-well plates (Eppendorf).

715

716 **Viral stocks.** The DENV-2 New Guinea 44 (NGC) strain (kindly provided by Steve Whitehead,  
717 NIH/NIAID, Bethesda, Maryland, USA), known to replicate well in rhesus macaques, was used  
718 for the challenge in order to obtain comparative results with previous published studies from our  
719 group on DENV and ZIKV challenge studies<sup>17,34</sup>. We have standardized the assays to quantify  
720 this virus by Plaque assay, as described in our previous work<sup>17</sup>. The titer of DENV-2 for the  
721 challenge was 5x10<sup>7</sup> pfu/ml. In addition, ZIKV H/PF/2013 strain (kindly provided by CDC-Dengue  
722 Branch, San Juan, Puerto Rico), ZIKV PRVABC59 (ATCC VR-1843), DENV-1 Western Pacific  
723 74, DENV-3 Sleman 73, and DENV-4 Dominique strains (kindly provided by Steve Whitehead  
724 from NIH/NIAID, Bethesda, Maryland, USA) were propagated in C6/36 cells, titrated and used for  
725 Plaque Reduction Neutralization Test (PRNT) assays.

726

727 **Viral titration plaque assay.** DENV titrations by plaque assay were performed seeding Vero-81  
728 (~8.5x10<sup>4</sup> cells /well) in flat bottom 24-well cell culture well plates (Eppendorf) in supplemented  
729 DMEM the day before. Viral dilutions (10-fold) were made in diluent media [Opti-MEM (Invitrogen)  
730 with 2% FBS (Gibco) and 1% P/S (Gibco)]. Prior to inoculation, growth medium was removed and  
731 cells were inoculated with 100 ul/well of each dilution in triplicates. Plates were incubated for 1  
732 hr, 37°C, 5% CO<sub>2</sub> and rocking. After incubation, virus dilutions were overlaid with 1 ml of Opti-  
733 MEM [1% Carboxymethylcellulose (Sigma), 2% FBS, 1% of NEAA (Gibco) and P/S (Gibco)]. After  
734 3 to 5 days of incubation (days vary between DENV serotypes), overlay was removed and cells  
735 were washed twice with phosphate buffered saline (PBS), fixed in 80% methanol (Sigma) in PBS,  
736 and incubated at room temperature (RT) for 15 minutes. Plates were blocked with 5% Non-fat dry  
737 milk (Denia) in PBS for 10 minutes. Blocking buffer was discarded and 200 ul/well of primary  
738 antibodies mix [anti-E protein monoclonal antibody (mAb) 4G2 and anti-prM protein mAb 2H2  
739 (kindly provided by Aravinda de Silva and Ralph Baric, University of North Carolina Chapel Hill,  
740 North Carolina, USA), both diluted 1:250 in blocking buffer] were added and incubated for 1 hr,

741 37°C, 5% CO<sub>2</sub> and rocking. Plates were washed twice with PBS and incubated in same conditions  
742 with horseradish peroxidase (HRP)-conjugated goat anti-mouse secondary antibody (Sigma),  
743 diluted 1:1000 in blocking buffer. Plates were washed twice with PBS and 150 ul/well of TrueBlue  
744 HRP substrate (KPL) were added and plates were incubated from 1-10 minutes at RT until plaque-  
745 forming units (pfu) were produced and visible. Then 200 ul/well of distilled water were added to  
746 stop the substrate reaction, plates get dry and pfu were counted to calculate viral titers.

747

748 **Macaques and viral challenge.** From 2008 to 2015, the Caribbean Primate Research Center  
749 (CPRC) funded a large DENV research program. Multiple studies made available several cohorts  
750 of rhesus macaques (*Macaca mulatta*) infected with different DENV serotypes in distinct timelines  
751 and also naïve cohorts were available as well. After our laboratories prioritized ZIKV research  
752 since 2016, DENV pre-exposed and naïve cohorts were infected with ZIKV and pre-exposed  
753 animals became available for this study. All animals were housed within the Animal Resources  
754 Center facilities at the University of Puerto Rico-Medical Sciences Campus (UPR-MSC), San  
755 Juan, Puerto Rico. All the procedures were performed under the approval of the Institutional  
756 Animal Care and Use Committee (IACUC) of UPR-MSC and in a facility accredited by the  
757 Association for Assessment and Accreditation of Laboratory Animal Care (AAALAC file # 000593;  
758 Animal Welfare Assurance number A3421; protocol number, 7890116). Procedures involving  
759 animals were conducted in accordance with USDA Animal Welfare Regulations, *the Guide for the*  
760 *Care and use of Laboratory Animals* and institutional policies to ensure minimal suffering of  
761 animals during procedures. All invasive procedures were conducted using anesthesia by  
762 intramuscular injection of ketamine at 10-20 mg kg<sup>-1</sup> of body weight. Rhesus macaques from the  
763 CPRC are very well genetically characterized from a common stock introduced in 1938 at Cayo  
764 Santiago, an islet located in the southeast of Puerto Rico. These macaques with Indian genetic  
765 background are part of the purest colony used in the United States for comparative medicine and  
766 biomedical research<sup>50</sup>

767 The experimental design was based on 14 young adult male rhesus macaques divided in  
768 three cohorts. Cohort 1 (ZIKV<sub>PF</sub>-10mo): composed of four animals (5K6, CB52, 2K2, and 6N1)  
769 that were inoculated with 1x10<sup>6</sup> pfu/500 ul of the ZIKV H/PF/2013 strain subcutaneously<sup>17</sup> 10  
770 months before DENV-2 challenge. Cohort 2 (ZIKV<sub>PR</sub>-2mo): composed of 6 animals (MA067,  
771 MA068, BZ34, MA141, MA143, and MA085) that were inoculated with 1x10<sup>6</sup> pfu/500 ul of the  
772 ZIKV PRVABC59 strain two months before DENV-2 challenge. Both ZIKV strains used for  
773 previous exposure of these groups are >99.99% comparable in amino acid identity  
774 (Supplementary Table 1). Cohort 3 (Naïve): composed of four ZIKV/DENV naïve animals (MA123,

775 MA023, MA029, and MA062) as a control group. Cohort 1 and 3 were challenged on the same  
776 day while cohort 2 was challenged 3 months later with the same stock of DENV-2. However, all  
777 samples were frozen and analyzed together, except for the immunophenotyping analysis.

778 The ages of all animals are within the age range for young adults rhesus macaques  
779 <https://www.nc3rs.org.uk/macaques/macaques/life-history-and-diet/> (ZIKVPF-10mo: 6.8, 6.8,  
780 5.8, and 5.9; ZIKVPR-2mo: 6.4, 6.5, 5.2, 4.3, 5.6, and 5.5; Naïve: 4.8, 6.6, 6.8, and 5.7). Prior to  
781 DENV-2 challenge all animals were subjected to quarantine period. All cohorts were bled for  
782 baseline and challenged subcutaneously (deltoid area) with  $5 \times 10^5$  pfu/500 ul of DENV-2 New  
783 Guinea 44 strain. After DENV-2 challenge all animals were extensively monitored by trained and  
784 certified veterinary staff for evidence of disease and clinical status: external temperature ( $^{\circ}\text{C}$ ) with  
785 an infrared device (EXTECH Instruments, Waltham, MA), weight (Kg), CBC and CMP. All animals  
786 were bled once daily from day 1 to day 10 and after that on days 15, 30, 60 and 90 post-infection  
787 (dpi). In all timepoints the blood samples were used for serum separation (Baseline, 7, 30, 60, 90  
788 dpi only). PBMCs were collected at same time points using CPT tubes (BD-Biosciences, San  
789 Jose, CA) containing citrate. Additional heparin samples were obtained for immunophenotyping  
790 by flow cytometry using fresh whole blood. Fig. 1 shows the experimental design and samples  
791 collection timeline.

792

793 **DENV RNAemia.** DENV viral RNA extraction was performed from acute serum samples  
794 (Baseline, 1-10, and 15 dpi) using QIAamp Viral RNA mini kit (Qiagen Inc, Valencia, CA, USA)  
795 according to the manufacturer's instructions. RNAemia levels were measured by a One-Step  
796 qRT-PCR detection kit (Oasig, Primerdesign Ltd., UK) and using DENV RT primer/probe Mix kit  
797 (Genesig, Primerdesign Ltd., UK) according to the manufacturer's protocol. Assays were  
798 performed in an iCycler IQ5 Real-Time Detection System with Optical System Software version  
799 2.1 (Bio-Rad, Hercules, CA, USA). Limit of detection (LOD) was 20 copies per ml. Furthermore,  
800 in order to correlate RNAemia levels with DENV pathogenesis we monitored the clinical status for  
801 injury and/or clinical manifestations. Complete Blood Counts (CBC) were performed for all  
802 animals in several timepoints (Baseline, 7, and 15 dpi) to determine the absolute number ( $10^6$   
803 cells/ml) and percent (%) of lymphocytes (LYM), monocytes (MON), white blood cells (WBC),  
804 neutrophils (NEU) and platelets (PLT). Also, Comprehensive Metabolic Panel (CMP) were  
805 evaluated in several timepoints (Baseline, 7, 15 and 30 dpi) to measure concentration (U/L) of  
806 alkaline phosphatase and liver enzymes alanine aminotransferase (ALT) and aspartate  
807 aminotransferase (AST).

808



809 **ELISA.** Seroreactivity to DENV and cross-reactivity to ZIKV was measured at different timepoints  
810 before and after DENV-2 challenge. DENV-IgM (Focus Diagnostics, Cypress, CA, USA) was  
811 quantified at baseline, 5, 10, 15 and 30 dpi. DENV-IgG was quantified at baseline, 7, 15, 30, 60  
812 and 90 dpi (Focus Diagnostics, Cypress, CA, USA). To determine the modulation of serological  
813 profile against ZIKV we assessed: levels of anti-ZIKV IgM (InBios, Seattle, WA, USA) at baseline,  
814 5, 10, 15 and 30 dpi; anti-ZIKV IgG (XPressBio, Frederick, MD, USA) at baseline, 7, 15, 30, 60  
815 and 90 dpi; anti-ZIKV NS1-IgG (Alpha Diagnostics, San Antonio, TX, USA) at baseline, 30, 60  
816 and 90 dpi (including additional timepoints prior baseline for both ZIKV-immune groups); and anti-  
817 ZIKV EDIII-IgG (Alpha Diagnostics International, San Antonio, TX, USA). All ELISA-based assays  
818 were performed following the manufacturers' instructions. This serological characterization allows  
819 us to assess the dynamics of DENV and ZIKV cross-reactivity but without discerning between  
820 cross-reactive binding Abs and cross- or type-specific neutralizing Abs.

821  
822 **Plaque Reduction Neutralization Test (PRNT).** Selected serum samples (baseline, 30, 60 and  
823 90 dpi) were challenged to neutralized ZIKV (H/PF/2013, PRVABC59), DENV-1 Western Pacific  
824 74, DENV-2 NGC 44, DENV-3 Sleman 73, and DENV-4 Dominique strains. For the infecting  
825 serotype (DENV-2) and ZIKV the NAbs were measured in early timepoints as well (7 and 15 dpi).  
826 For the PRNT, serum samples were inactivated, diluted (2-fold), mixed with a constant inoculum  
827 of virus (volume necessary to produce ~35 pfu/well) and then incubated for 1 hr at 37°C and 5%  
828 CO<sub>2</sub>. After incubation, virus-serum mix dilutions were added to Vero-81 cells monolayer in flat  
829 bottom 24-well plates seeded the day before for 1 hr at 37°C and 5% CO<sub>2</sub>, finally overlay medium  
830 was added and incubated by several days (serotype dependent). Results were reported as  
831 PRNT60 titers, NAb titer capable of reduce 60% or more of DENV serotypes or ZIKV strains pfu  
832 compared with the mock (control of virus without serum). A PRNT60 1:20 titer was considered a  
833 positive Neut titer, and <1:20 as a negative Neut titer. Non-neutralizing titers (<1:20) were  
834 assigned with one-half of the limit of detection for graphs visualization.

835  
836 **Multiplex cytokine profile.** A total of 8 cytokines/chemokines were measured (pg /ml<sup>1</sup>) by  
837 Luminex at baseline, 1, 2, 3, 5, 10, 15 and 30 dpi, including: interferon alpha (IFN-α), interleukin-  
838 6 (IL-6), monokine induced by IFN-gamma (MIG/CXCL9), monocyte chemoattractant protein 1  
839 (MCP-1/CCL2), macrophage inflammatory protein 1-beta (MIP-1β/CCL4), IL-1 receptor  
840 antagonist (IL-1RA), C-X-C motif chemokine 10 (CXCL10/IP-10) and perforin. The multiplex  
841 assay was conducted as previously described<sup>17,92</sup>.

842

843 **Immunophenotyping.** Flow cytometry (MACSQuant Analyzer 10, Miltenyi Biotec) analysis was  
844 performed to determine the frequency, activation and proliferation of cell populations of the innate  
845 and adaptive immune response based on the phenotyping strategy of a previous study<sup>17</sup>  
846 (Supplementary Fig. 7, 8, and 9 for gating strategy; Supplementary Table 2 for Ab panel).  
847 Phenotypic characterization of macaque PBMCs from fresh whole blood samples was performed  
848 by 8-multicolor flow cytometry using fluorochrome conjugated Abs at several timepoints (Baseline,  
849 1, 2, 3, 7, 10 dpi; and 15 and 30 dpi for B/T cell panel only). Single cells (singlets) were selected  
850 by their FSC area (FSC-A) and height (FSC-H) patterns. Lymphocytes (LYM) were gated based  
851 on their characteristic forward and side scatter pattern (FSC, SSC). T cells were selected gating  
852 on the CD3<sup>+</sup> population. CD4<sup>+</sup> and CD8<sup>+</sup> T cells were defined as CD3<sup>+</sup>CD4<sup>+</sup> and CD3<sup>+</sup>CD8<sup>+</sup>,  
853 respectively. Naive (N; CD28<sup>+</sup>CD95<sup>-</sup>), effector memory (EM; CD28<sup>-</sup>CD95<sup>+</sup>) and central memory  
854 (CM; CD28<sup>+</sup>CD95<sup>+</sup>) T cell subpopulations were determined within CD4<sup>+</sup> and CD8<sup>+</sup> T cells. B cells  
855 were defined as CD20<sup>+</sup>CD3<sup>-</sup>. The activation of B and T cell memory subpopulations (EM and CM)  
856 was assessed by the presence of the early activation marker CD69. Proliferation of total and  
857 activated B cells was quantified by the expression of the intracellular marker Ki67. Natural killer  
858 (NK) cells were defined as CD3<sup>-</sup>CD20<sup>-</sup>CD14<sup>-</sup> and analyzed by the double positive expression of  
859 the following NK cell markers: CD8, CD56, NKG2A, NKp30, and NKp46 (Supplementary Fig. 9  
860 for gating strategy). Dendritic cells (DC) were separated in two populations within the Lineage-  
861 DR<sup>+</sup> (HLA-DR<sup>+</sup> CD3<sup>-</sup> CD14<sup>-</sup> CD16<sup>-</sup> CD20<sup>-</sup> CD8<sup>-</sup> NKG2A<sup>-</sup>) by the expression of CD123  
862 (plasmacytoid, pDC) or CD11c (myeloid, mDCs) (Supplementary Fig. 8 for gating strategy). Then,  
863 DC percentages were calculated from total PBMCs (total events of the DC subpopulation divided  
864 by total PBMCs and multiplied by 100). The phenotyping assays were optimized and performed  
865 as previously published<sup>17,34,93</sup>.

866  
867 **T cell functional response.** Intracellular cytokine staining of macaques PBMCs was performed  
868 by multicolor flow cytometry using methods previously described (Supplementary Fig. 14 for  
869 gating strategy; Supplementary Table 3 for Ab panel)<sup>17,93</sup>. Functional effector response of CD4<sup>+</sup>  
870 and CD8<sup>+</sup> T cells was measured before and after DENV infection. Antigen-specific CD4<sup>+</sup> and  
871 CD8<sup>+</sup> T cell effector responses were measured at baseline to determine basal levels in presence  
872 (ZIKVVPF-10mo, ZIKVPR-2mo) or absence (Naïve) of previous immunity to ZIKV. Also, 30, 60 and  
873 90 dpi were assessed to determine how this pre-existing functional response is modulated after  
874 DENV infection and if is maintained over time. For peptide pools stimulation, PBMCs were  
875 stimulated for 6 hr at 37°C and 5% CO<sub>2</sub>. The peptides used for DENV-E, ZIKV-E and ZIKV-NS  
876 were 15-mers overlapped by 10 amino acids at 1.25 ug/ml<sup>-1</sup>, 2.5 ug/ml<sup>-1</sup>, 475 ng/ml<sup>-1</sup> per peptide,

877 respectively (Supplementary Table 4 for peptide sequences). The stimulation with peptides was  
878 performed in presence of brefeldin A at  $10 \text{ ug/ml}^{-1}$ . After stimulation, the cells were stained for the  
879 following markers: CD3, CD4, CD8, CD20 (excluded), CD107a (functional cytotoxicity). Levels of  
880 IFN- $\gamma$  and TNF- $\alpha$  also were measured in gated lymphocytes cell populations. Samples were  
881 measured and data was collected on a LSRII (BD).

882

883 **Statistical analysis.** Statistical analyses were performed using GraphPad Prism 7.0 software  
884 (GraphPad Software, San Diego, CA, USA). The statistical significance between the means of all  
885 groups were determined using Two-way ANOVA Multiple Comparison Tukey Test, and to  
886 compare each mean against the baseline mean within same group Two-way ANOVA Multiple  
887 Comparison Dunnett Test was performed. Total number of families and comparisons per family  
888 used for adjustments are depicted in each figure legend. Significant multiplicity adjusted  $p$  values  
889 (\*  $<0.05$ , \*\*  $<0.01$ , \*\*\*  $<0.001$ , \*\*\*\*  $<0.0001$ ) show statistically significant difference between  
890 groups (Tukey Test) or timepoints within a group (Dunnett Test).

891

892 **Data availability.** All relevant data is in main figures and supplementary information, any  
893 additional details are available from authors upon request.

894

895 **Acknowledgments.** We thank all the staff of the Caribbean Primate Research Center and Animal  
896 Resources Center for their continuous support with the sample collection, schedule, and  
897 monitoring of the animals. Authors recognize the support provided by Dr. Elmer Rodriguez  
898 reviewing the statistics. This work was supported by the following grants: 2 P40 OD012217 and  
899 2U42OD021458-15 to C.A.S. and M.I.M., K22AI104794 to J.D.B., P51OD011133 (L.G.),  
900 HHSN272201400045C to D.W., and R25GM061838 to E.X.P.-G.

901

902 **Author contributions.** C.A.S. and E.X.P.-G. developed the experimental design. I.V.R.  
903 supervised and performed sample collection and animals monitoring. E.X.P.-G., P.P., C.S.-C.,  
904 M.A.H., A.O.-R., V.H., L.P., L.C., and T.A. performed the experiments. E.X.P.-G., C.A.S., V.H.,  
905 M.A.H., L.J.W., A.d.S., and D.W. analyzed the data. E.X.P.-G. and C.A.S. drafted the manuscript.  
906 C.A.S., E.X.P.-G., D.W., A.K.P., J.D.B., M.A.H., L.G., L.J.W., and A.d.S. revised the manuscript.

907

908 **Additional Information**

909

910 **Supplementary Information** available at:

911

912 **Competing interests:** The authors declare no competing financial interests.

913

## 914 **References**

915

916

- 917 1 Metsky, H. C. *et al.* Zika virus evolution and spread in the Americas. *Nature* **546**, 411-415,  
918 doi:10.1038/nature22402 (2017).
- 919 2 Garcez, P. P. *et al.* Zika virus impairs growth in human neurospheres and brain organoids.  
920 *Science (New York, N.Y.)* **352**, 816-818, doi:10.1126/science.aaf6116 (2016).
- 921 3 Li, C. *et al.* Zika Virus Disrupts Neural Progenitor Development and Leads to Microcephaly  
922 in Mice. *Cell stem cell* **19**, 672, doi:10.1016/j.stem.2016.10.017 (2016).
- 923 4 Mlakar, J. *et al.* Zika Virus Associated with Microcephaly. *The New England journal of*  
924 *medicine* **374**, 951-958, doi:10.1056/NEJMoa1600651 (2016).
- 925 5 de Oliveira, W. K. *et al.* Zika Virus Infection and Associated Neurologic Disorders in Brazil.  
926 *The New England journal of medicine* **376**, 1591-1593, doi:10.1056/NEJMc1608612  
927 (2017).
- 928 6 Guo, C. *et al.* Global Epidemiology of Dengue Outbreaks in 1990-2015: A Systematic  
929 Review and Meta-Analysis. *Frontiers in cellular and infection microbiology* **7**, 317,  
930 doi:10.3389/fcimb.2017.00317 (2017).
- 931 7 Bhatt, S. *et al.* The global distribution and burden of dengue. *Nature* **496**, 504-507,  
932 doi:10.1038/nature12060 (2013).
- 933 8 Katzelnick, L. C. *et al.* Dengue viruses cluster antigenically but not as discrete serotypes.  
934 *Science (New York, N.Y.)* **349**, 1338-1343, doi:10.1126/science.aac5017 (2015).
- 935 9 Khurram, M. *et al.* Dengue hemorrhagic fever: comparison of patients with primary and  
936 secondary infections. *Journal of infection and public health* **7**, 489-495,  
937 doi:10.1016/j.jiph.2014.05.005 (2014).
- 938 10 Guzman, M. G. *et al.* Enhanced severity of secondary dengue-2 infections: death rates in  
939 1981 and 1997 Cuban outbreaks. *Rev Panam Salud Publica* **11**, 223-227, doi:S1020-  
940 49892002000400003 [pii] (2002).
- 941 11 Guzman, M. G., Alvarez, M. & Halstead, S. B. Secondary infection as a risk factor for  
942 dengue hemorrhagic fever/dengue shock syndrome: an historical perspective and role of  
943 antibody-dependent enhancement of infection. *Archives of virology* **158**, 1445-1459,  
944 doi:10.1007/s00705-013-1645-3 (2013).
- 945 12 Barba-Spaeth, G. *et al.* Structural basis of potent Zika-dengue virus antibody cross-  
946 neutralization. *Nature* **536**, 48-53, doi:10.1038/nature18938 (2016).
- 947 13 Butler, D. Brazil asks whether Zika acts alone to cause birth defects. *Nature* **535**, 475-476,  
948 doi:10.1038/nature.2016.20309 (2016).
- 949 14 Dejnirattisai, W. *et al.* Dengue virus sero-cross-reactivity drives antibody-dependent  
950 enhancement of infection with zika virus. *Nature immunology*, doi:10.1038/ni.3515 (2016).
- 951 15 Priyamvada, L. *et al.* Human antibody responses after dengue virus infection are highly  
952 cross-reactive to Zika virus. *Proceedings of the National Academy of Sciences of the*  
953 *United States of America* **113**, 7852-7857, doi:10.1073/pnas.1607931113 (2016).
- 954 16 Bardina, S. V. *et al.* Enhancement of Zika virus pathogenesis by preexisting ant flavivirus  
955 immunity. *Science (New York, N.Y.)* **DOI 10.1126/science.aal4365**,  
956 doi:10.1126/science.aal4365 (2017).
- 957 17 Pantoja, P. *et al.* Zika virus pathogenesis in rhesus macaques is unaffected by pre-existing  
958 immunity to dengue virus. *Nature communications* **8**, 15674, doi:10.1038/ncomms15674  
959 (2017).

- 960 18 McCracken, M. K. *et al.* Impact of prior flavivirus immunity on Zika virus infection in rhesus  
961 macaques. *PLoS pathogens* **13**, e1006487, doi:10.1371/journal.ppat.1006487 (2017).
- 962 19 Terzian, A. C. B. *et al.* Viral Load and Cytokine Response Profile Does Not Support  
963 Antibody-Dependent Enhancement in Dengue-Primed Zika Virus-Infected Patients.  
964 *Clinical infectious diseases : an official publication of the Infectious Diseases Society of*  
965 *America* **65**, 1260-1265, doi:10.1093/cid/cix558 (2017).
- 966 20 Gordon, A. *et al.* Prior dengue virus infection and risk of Zika: A pediatric cohort in  
967 Nicaragua. *PLoS medicine* **16**, e1002726, doi:10.1371/journal.pmed.1002726 (2019).
- 968 21 Kam, Y. W. *et al.* Cross-reactive dengue human monoclonal antibody prevents severe  
969 pathologies and death from Zika virus infections. *JCI insight* **2**,  
970 doi:10.1172/jci.insight.92428 (2017).
- 971 22 Wen, J. *et al.* Dengue virus-reactive CD8(+) T cells mediate cross-protection against  
972 subsequent Zika virus challenge. *Nature communications* **8**, 1459, doi:10.1038/s41467-  
973 017-01669-z (2017).
- 974 23 Wen, J. *et al.* Identification of Zika virus epitopes reveals immunodominant and protective  
975 roles for dengue virus cross-reactive CD8(+) T cells. *Nature microbiology* **2**, 17036,  
976 doi:10.1038/nmicrobiol.2017.36 (2017).
- 977 24 Grifoni, A. *et al.* Prior Dengue virus exposure shapes T cell immunity to Zika virus in  
978 humans. *Journal of virology* DOI **10.1128/jvi.01469-17**, doi:10.1128/jvi.01469-17 (2017).
- 979 25 Perez, F. *et al.* The decline of dengue in the Americas in 2017: discussion of multiple  
980 hypotheses. *Tropical medicine & international health : TM & IH*, doi:10.1111/tmi.13200  
981 (2019).
- 982 26 Solimini, A. G., Manica, M., Rosa, R., Della Torre, A. & Caputo, B. Estimating the risk of  
983 Dengue, Chikungunya and Zika outbreaks in a large European city. *Scientific reports* **8**,  
984 16435, doi:10.1038/s41598-018-34664-5 (2018).
- 985 27 Gutierrez-Lopez, R. *et al.* Vector Competence of *Aedes caspius* and *Ae. albopictus*  
986 Mosquitoes for Zika Virus, Spain. *Emerging infectious diseases* **25**, 346-348,  
987 doi:10.3201/eid2502.171123 (2019).
- 988 28 Ribeiro, G. S. *et al.* Does immunity after Zika virus infection cross-protect against dengue?  
989 *The Lancet. Global health* **6**, e140-e141, doi:10.1016/s2214-109x(17)30496-5 (2018).
- 990 29 Sariol, C. A. & White, L. J. Utility, limitations, and future of non-human primates for dengue  
991 research and vaccine development. *Frontiers in immunology* **5**, 452,  
992 doi:10.3389/fimmu.2014.00452 (2014).
- 993 30 Clark, K. B., Onlamoon, N., Hsiao, H. M., Perng, G. C. & Villinger, F. Can non-human  
994 primates serve as models for investigating dengue disease pathogenesis? *Frontiers in*  
995 *microbiology* **4**, 305, doi:10.3389/fmicb.2013.00305 (2013).
- 996 31 Koraka, P., Benton, S., van Amerongen, G., Stittelaar, K. J. & Osterhaus, A. D.  
997 Characterization of humoral and cellular immune responses in cynomolgus macaques  
998 upon primary and subsequent heterologous infections with dengue viruses. *Microbes and*  
999 *infection* **9**, 940-946, doi:10.1016/j.micinf.2007.03.012 (2007).
- 1000 32 Borges, M. B. *et al.* Characterization of recent and minimally passaged Brazilian dengue  
1001 viruses inducing robust infection in rhesus macaques. *PloS one* **13**, e0196311,  
1002 doi:10.1371/journal.pone.0196311 (2018).
- 1003 33 White, L. J. *et al.* An alphavirus vector-based tetravalent dengue vaccine induces a rapid  
1004 and protective immune response in macaques that differs qualitatively from immunity  
1005 induced by live virus infection. *Journal of virology* **87**, 3409-3424, doi:10.1128/JVI.02298-  
1006 12 (2013).
- 1007 34 Sariol, C. A. *et al.* Decreased Dengue Replication and an Increased Anti-viral Humoral  
1008 Response with the use of Combined Toll-Like Receptor 3 and 7/8 Agonists in Macaques.  
1009 *PloS one* **6**, 9 (2011).

- 1010 35 Kawiecki, A. B. & Christofferson, R. C. Zika Virus-Induced Antibody Response Enhances  
1011 Dengue Virus Serotype 2 Replication In Vitro. *The Journal of infectious diseases* **214**,  
1012 1357-1360, doi:10.1093/infdis/jiw377 (2016).
- 1013 36 Stettler, K. *et al.* Specificity, cross-reactivity, and function of antibodies elicited by Zika  
1014 virus infection. *Science (New York, N.Y.)* **353**, 823-826, doi:10.1126/science.aaf8505  
1015 (2016).
- 1016 37 Fowler, A. M. *et al.* Maternally Acquired Zika Antibodies Enhance Dengue Disease  
1017 Severity in Mice. *Cell host & microbe* **24**, 743-750.e745, doi:10.1016/j.chom.2018.09.015  
1018 (2018).
- 1019 38 George, J. *et al.* Prior Exposure to Zika Virus Significantly Enhances Peak Dengue-2  
1020 Viremia in Rhesus Macaques. *Scientific reports* **7**, 10498, doi:10.1038/s41598-017-  
1021 10901-1 (2017).
- 1022 39 Valiant, W. G. *et al.* Zika convalescent macaques display delayed induction of anamnestic  
1023 cross-neutralizing antibody responses after dengue infection. *Emerging microbes &*  
1024 *infections* **7**, 130, doi:10.1038/s41426-018-0132-z (2018).
- 1025 40 Breitbach, M. E. *et al.* Primary infection with dengue or Zika virus does not affect the  
1026 severity of heterologous secondary infection in macaques. *PLoS pathogens* **15**,  
1027 e1007766, doi:10.1371/journal.ppat.1007766 (2019).
- 1028 41 Anderson, K. B. *et al.* A shorter time interval between first and second dengue infections  
1029 is associated with protection from clinical illness in a school-based cohort in Thailand. *The*  
1030 *Journal of infectious diseases* **209**, 360-368, doi:10.1093/infdis/jit436 (2014).
- 1031 42 Montoya, M. *et al.* Symptomatic versus inapparent outcome in repeat dengue virus  
1032 infections is influenced by the time interval between infections and study year. *PLoS*  
1033 *neglected tropical diseases* **7**, e2357, doi:10.1371/journal.pntd.0002357 (2013).
- 1034 43 Kliks, S. C., Nimmanitya, S., Nisalak, A. & Burke, D. S. Evidence that maternal dengue  
1035 antibodies are important in the development of dengue hemorrhagic fever in infants. *The*  
1036 *American journal of tropical medicine and hygiene* **38**, 411-419 (1988).
- 1037 44 Bhoomiboonchoo, P. *et al.* Sequential dengue virus infections detected in active and  
1038 passive surveillance programs in Thailand, 1994-2010. *BMC public health* **15**, 250,  
1039 doi:10.1186/s12889-015-1590-z (2015).
- 1040 45 Arien, K. K., Michiels, J., Foque, N., Heyndrickx, L. & Van Esbroeck, M. Can Zika virus  
1041 antibodies cross-protect against dengue virus? *The Lancet. Global health* **6**, e494,  
1042 doi:10.1016/s2214-109x(18)30122-0 (2018).
- 1043 46 Ribeiro, G. S. *et al.* Can Zika virus antibodies cross-protect against dengue virus? -  
1044 Authors' reply. *The Lancet. Global health* **6**, e495, doi:10.1016/s2214-109x(18)30123-2  
1045 (2018).
- 1046 47 Katzelnick, L. C. & Harris, E. The use of longitudinal cohorts for studies of dengue viral  
1047 pathogenesis and protection. *Current opinion in virology* **29**, 51-61,  
1048 doi:10.1016/j.coviro.2018.03.004 (2018).
- 1049 48 Katzelnick, L. C., Montoya, M., Gresh, L., Balmaseda, A. & Harris, E. Neutralizing antibody  
1050 titers against dengue virus correlate with protection from symptomatic infection in a  
1051 longitudinal cohort. *Proceedings of the National Academy of Sciences of the United States*  
1052 *of America* **113**, 728-733, doi:10.1073/pnas.1522136113 (2016).
- 1053 49 Weiskopf, D. *et al.* Dengue virus infection elicits highly polarized CX3CR1+ cytotoxic  
1054 CD4+ T cells associated with protective immunity. *Proceedings of the National Academy*  
1055 *of Sciences of the United States of America* **112**, E4256-4263,  
1056 doi:10.1073/pnas.1505956112 (2015).
- 1057 50 Kanthaswamy, S. *et al.* The Population Genetic Composition of Conventional and SPF  
1058 Colonies of Rhesus Macaques (*Macaca mulatta*) at the Caribbean Primate Research  
1059 Center. *Journal of the American Association for Laboratory Animal Science : JAALAS* **55**,  
1060 147-151 (2016).

- 1061 51 Collins, M. H. *et al.* Lack of Durable Cross-Neutralizing Antibodies Against Zika Virus from  
1062 Dengue Virus Infection. *Emerging infectious diseases* **23**, 773-781,  
1063 doi:10.3201/eid2305.161630 (2017).
- 1064 52 Dowd, K. A. *et al.* Broadly Neutralizing Activity of Zika Virus-Immune Sera Identifies a  
1065 Single Viral Serotype. *Cell reports* **16**, 1485-1491, doi:10.1016/j.celrep.2016.07.049  
1066 (2016).
- 1067 53 Swanstrom, J. A. *et al.* Dengue Virus Envelope Dimer Epitope Monoclonal Antibodies  
1068 Isolated from Dengue Patients Are Protective against Zika Virus. *mBio* **7**, DOI  
10.1128/mBio.01123-01116, doi:10.1128/mBio.01123-16 (2016).
- 1070 54 Serrano-Collazo, C. *et al.* Significant control of Zika infection in macaques depends on the  
1071 elapsing time after dengue exposure. *bioRxiv*, 625293, doi:10.1101/625293 (2019).
- 1072 55 de Alwis, R. *et al.* In-depth analysis of the antibody response of individuals exposed to  
1073 primary dengue virus infection. *PLoS Negl Trop Dis* **5**, e1188,  
1074 doi:10.1371/journal.pntd.0001188 (2011).
- 1075 56 Wahala, W. M. & Silva, A. M. The human antibody response to dengue virus infection.  
1076 *Viruses* **3**, 2374-2395, doi:10.3390/v3122374 (2011).
- 1077 57 Andrade, P. *et al.* Impact of pre-existing dengue immunity on human antibody and memory  
1078 B cell responses to Zika. *Nature communications* **10**, 938, doi:10.1038/s41467-019-  
1079 08845-3 (2019).
- 1080 58 Priyamvada, L. *et al.* B Cell Responses during Secondary Dengue Virus Infection Are  
1081 Dominated by Highly Cross-Reactive, Memory-Derived Plasmablasts. *Journal of virology*  
1082 **90**, 5574-5585, doi:10.1128/jvi.03203-15 (2016).
- 1083 59 Montoya, M. *et al.* Longitudinal Analysis of Antibody Cross-neutralization Following Zika  
1084 Virus and Dengue Virus Infection in Asia and the Americas. *The Journal of infectious*  
1085 *diseases* **218**, 536-545, doi:10.1093/infdis/jiy164 (2018).
- 1086 60 Gallichotte, E. N. *et al.* Genetic Variation between Dengue Virus Type 4 Strains Impacts  
1087 Human Antibody Binding and Neutralization. *Cell reports* **25**, 1214-1224,  
1088 doi:10.1016/j.celrep.2018.10.006 (2018).
- 1089 61 Mathew, A., Townsley, E. & Ennis, F. A. Elucidating the role of T cells in protection against  
1090 and pathogenesis of dengue virus infections. *Future microbiology* **9**, 411-425,  
1091 doi:10.2217/fmb.13.171 (2014).
- 1092 62 St John, A. L. & Rathore, A. P. S. Adaptive immune responses to primary and secondary  
1093 dengue virus infections. *Nature reviews. Immunology*, doi:10.1038/s41577-019-0123-x  
1094 (2019).
- 1095 63 Miller, J. D. *et al.* Human effector and memory CD8+ T cell responses to smallpox and  
1096 yellow fever vaccines. *Immunity* **28**, 710-722, doi:10.1016/j.immuni.2008.02.020 (2008).
- 1097 64 Knudsen, M. L. *et al.* Kinetic and phenotypic analysis of CD8+ T cell responses after  
1098 priming with alphavirus replicons and homologous or heterologous booster  
1099 immunizations. *Journal of virology* **88**, 12438-12451, doi:10.1128/jvi.02223-14 (2014).
- 1100 65 Grifoni, A. *et al.* Cutting Edge: Transcriptional Profiling Reveals Multifunctional and  
1101 Cytotoxic Antiviral Responses of Zika Virus-Specific CD8(+) T Cells. *Journal of*  
1102 *immunology (Baltimore, Md. : 1950)* **201**, 3487-3491, doi:10.4049/jimmunol.1801090  
1103 (2018).
- 1104 66 Gunther, V. J. *et al.* A human challenge model for dengue infection reveals a possible  
1105 protective role for sustained interferon gamma levels during the acute phase of illness.  
1106 *Vaccine* **29**, 3895-3904, doi:10.1016/j.vaccine.2011.03.038 (2011).
- 1107 67 Wijeratne, D. T. *et al.* Quantification of dengue virus specific T cell responses and  
1108 correlation with viral load and clinical disease severity in acute dengue infection. *PLoS*  
1109 *neglected tropical diseases* **12**, e0006540, doi:10.1371/journal.pntd.0006540 (2018).
- 1110 68 Weiskopf, D. *et al.* Comprehensive analysis of dengue virus-specific responses supports  
1111 an HLA-linked protective role for CD8+ T cells. *Proceedings of the National Academy of*

- 1112 *Sciences of the United States of America* **110**, E2046-2053,  
1113 doi:10.1073/pnas.1305227110 (2013).
- 1114 69 Mathew, A. *et al.* Predominance of HLA-restricted cytotoxic T-lymphocyte responses to  
1115 serotype-cross-reactive epitopes on nonstructural proteins following natural secondary  
1116 dengue virus infection. *Journal of virology* **72**, 3999-4004 (1998).
- 1117 70 Hatch, S. *et al.* Intracellular cytokine production by dengue virus-specific T cells correlates  
1118 with subclinical secondary infection. *The Journal of infectious diseases* **203**, 1282-1291,  
1119 doi:10.1093/infdis/jir012 (2011).
- 1120 71 Reynolds, C. J. *et al.* T cell immunity to Zika virus targets immunodominant epitopes that  
1121 show cross-reactivity with other Flaviviruses. *Scientific reports* **8**, 672,  
1122 doi:10.1038/s41598-017-18781-1 (2018).
- 1123 72 Rivino, L. *et al.* Differential targeting of viral components by CD4+ versus CD8+ T  
1124 lymphocytes in dengue virus infection. *Journal of virology* **87**, 2693-2706,  
1125 doi:10.1128/jvi.02675-12 (2013).
- 1126 73 Elong Ngonu, A. *et al.* CD4+ T cells promote humoral immunity and viral control during  
1127 Zika virus infection. *PLoS pathogens* **15**, e1007474, doi:10.1371/journal.ppat.1007474  
1128 (2019).
- 1129 74 Restrepo, B. N. *et al.* Serum levels of interleukin-6, tumor necrosis factor-alpha and  
1130 interferon-gamma in infants with and without dengue. *Revista da Sociedade Brasileira de  
1131 Medicina Tropical* **41**, 6-10 (2008).
- 1132 75 Hober, D. *et al.* Serum levels of tumor necrosis factor-alpha (TNF-alpha), interleukin-6 (IL-  
1133 6), and interleukin-1 beta (IL-1 beta) in dengue-infected patients. *The American journal of  
1134 tropical medicine and hygiene* **48**, 324-331 (1993).
- 1135 76 Chen, L. C. *et al.* Correlation of serum levels of macrophage migration inhibitory factor  
1136 with disease severity and clinical outcome in dengue patients. *The American journal of  
1137 tropical medicine and hygiene* **74**, 142-147 (2006).
- 1138 77 Dalrymple, N. A. & Mackow, E. R. Endothelial cells elicit immune-enhancing responses to  
1139 dengue virus infection. *Journal of virology* **86**, 6408-6415, doi:10.1128/jvi.00213-12  
1140 (2012).
- 1141 78 Huang, J. *et al.* Serum Cytokine Profiles in Patients with Dengue Fever at the Acute  
1142 Infection Phase. *Disease markers* **2018**, 8403937, doi:10.1155/2018/8403937 (2018).
- 1143 79 Gandini, M. *et al.* Dengue virus activates membrane TRAIL relocalization and IFN-alpha  
1144 production by human plasmacytoid dendritic cells in vitro and in vivo. *PLoS neglected  
1145 tropical diseases* **7**, e2257, doi:10.1371/journal.pntd.0002257 (2013).
- 1146 80 Kurane, I. *et al.* High levels of interferon alpha in the sera of children with dengue virus  
1147 infection. *The American journal of tropical medicine and hygiene* **48**, 222-229 (1993).
- 1148 81 Singla, M. *et al.* Immune Response to Dengue Virus Infection in Pediatric Patients in New  
1149 Delhi, India--Association of Viremia, Inflammatory Mediators and Monocytes with Disease  
1150 Severity. *PLoS neglected tropical diseases* **10**, e0004497,  
1151 doi:10.1371/journal.pntd.0004497 (2016).
- 1152 82 Dufour, J. H. *et al.* IFN-gamma-inducible protein 10 (IP-10; CXCL10)-deficient mice reveal  
1153 a role for IP-10 in effector T cell generation and trafficking. *Journal of immunology  
1154 (Baltimore, Md. : 1950)* **168**, 3195-3204 (2002).
- 1155 83 Hsieh, M. F. *et al.* Both CXCR3 and CXCL10/IFN-inducible protein 10 are required for  
1156 resistance to primary infection by dengue virus. *Journal of immunology (Baltimore, Md. :  
1157 1950)* **177**, 1855-1863 (2006).
- 1158 84 Gagnon, S. J., Ennis, F. A. & Rothman, A. L. Bystander target cell lysis and cytokine  
1159 production by dengue virus-specific human CD4(+) cytotoxic T-lymphocyte clones.  
1160 *Journal of virology* **73**, 3623-3629 (1999).



- 1161 85 Dudley, D. M. *et al.* Infection via mosquito bite alters Zika virus tissue tropism and  
1162 replication kinetics in rhesus macaques. *Nature communications* **8**, 2096,  
1163 doi:10.1038/s41467-017-02222-8 (2017).
- 1164 86 Magnani, D. M. *et al.* Neutralizing human monoclonal antibodies prevent Zika virus  
1165 infection in macaques. *Science translational medicine* **9**,  
1166 doi:10.1126/scitranslmed.aan8184 (2017).
- 1167 87 Masel, J. *et al.* Does prior dengue virus exposure worsen clinical outcomes of Zika virus  
1168 infection? A systematic review, pooled analysis and lessons learned. *PLoS neglected*  
1169 *tropical diseases* **13**, e0007060, doi:10.1371/journal.pntd.0007060 (2019).
- 1170 88 Osuna, C. E. *et al.* Zika viral dynamics and shedding in rhesus and cynomolgus  
1171 macaques. *Nature medicine* DOI **10.1038/nm.4206**, doi:10.1038/nm.4206 (2016).
- 1172 89 Silveira, E. L. V. *et al.* Immune Cell Dynamics in Rhesus Macaques Infected with a  
1173 Brazilian Strain of Zika Virus. *Journal of immunology (Baltimore, Md. : 1950)* **199**, 1003-  
1174 1011, doi:10.4049/jimmunol.1700256 (2017).
- 1175 90 Althouse, B. M. *et al.* Potential for Zika Virus to Establish a Sylvatic Transmission Cycle in  
1176 the Americas. *PLoS neglected tropical diseases* **10**, e0005055,  
1177 doi:10.1371/journal.pntd.0005055 (2016).
- 1178 91 Favoretto, S. R. *et al.* Zika Virus in Peridomestic Neotropical Primates, Northeast Brazil.  
1179 *EcoHealth*, doi:10.1007/s10393-019-01394-7 (2019).
- 1180 92 Giavedoni, L. D. Simultaneous detection of multiple cytokines and chemokines from  
1181 nonhuman primates using luminex technology. *Journal of immunological methods* **301**,  
1182 89-101, doi:10.1016/j.jim.2005.03.015 (2005).
- 1183 93 Meyer, C., Haberthur, K., Asquith, M. & Messaoudi, I. Flow Cytometry-Based Methods to  
1184 Characterize Immune Senescence in Nonhuman Primates. *Methods in molecular biology*  
1185 **1343**, 65-80, doi:10.1007/978-1-4939-2963-4\_6 (2015).
- 1186

# Main Figures

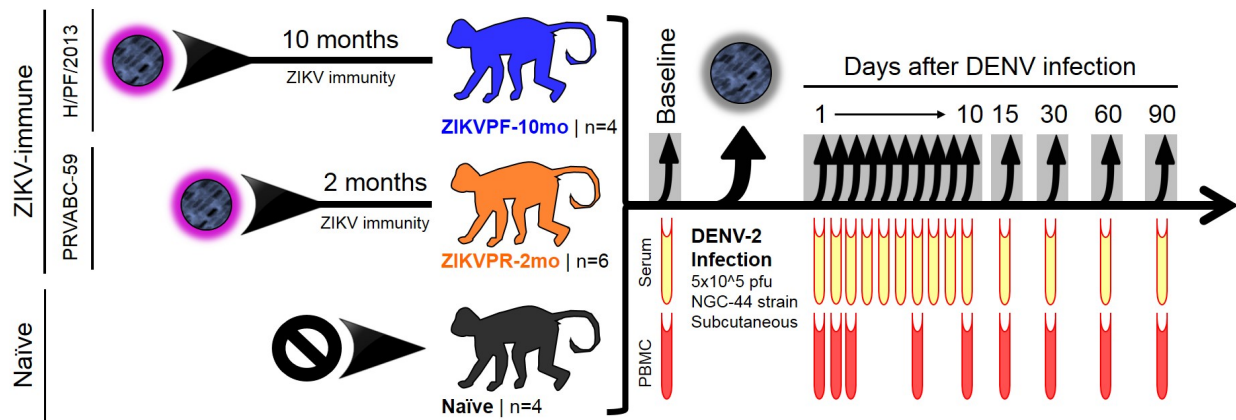

**Figure 1 | Experimental design for DENV-2 challenge of ZIKV-immune and naïve rhesus macaques.** 14 young adult male rhesus macaques (*Macaca mulatta*), matched in age and weight, were divided in three cohorts. ZIKVPF-10mo (n=4): composed of four animals (5K6, CB52, 2K2, and 6N1) that were inoculated with  $1 \times 10^6$  pfu/500 ul of the ZIKV H/PPF/2013 strain subcutaneously 10 months before (middle convalescence) DENV-2 challenge. ZIKVPR-2mo (n=6): composed of six animals (MA067, MA068, BZ34, MA141, MA143, and MA085) that were inoculated with  $1 \times 10^6$  pfu/500 ul of the contemporary ZIKV PRVABC59 strain two months before (early convalescence) DENV-2 challenge. Both ZIKV strains used for previous exposure of these groups are >99.99% comparable in amino acid identity (Supplementary Table 1). Naïve (n=4): composed of four ZIKV/DENV naïve animals (MA123, MA023, MA029, and MA062) as a control group. Prior to DENV-2 challenge all animals were subjected to quarantine period. All cohorts challenged subcutaneously (deltoid area) with  $5 \times 10^5$  pfu/500 ul of DENV-2 New Guinea 44 strain (NGC44). After DENV-2 challenge all animals were extensively monitored for evidence of disease and clinical status by vital signs such as external temperature ( $^{\circ}\text{C}$ ), weight (Kg), CBC and CMP panels at the Caribbean Primate Research Center (CPRC). Blood samples were collected at baseline, 1 to 10, 15, 30, 60 and 90 days after DENV infection. In all timepoints the blood samples were used for serum separation (yellow). PBMCs isolation (red) was performed in different tubes with citrate as anticoagulant at baseline, 1, 2, 3, 7, 10, 15, 30, 60, and 90 days after DENV infection.

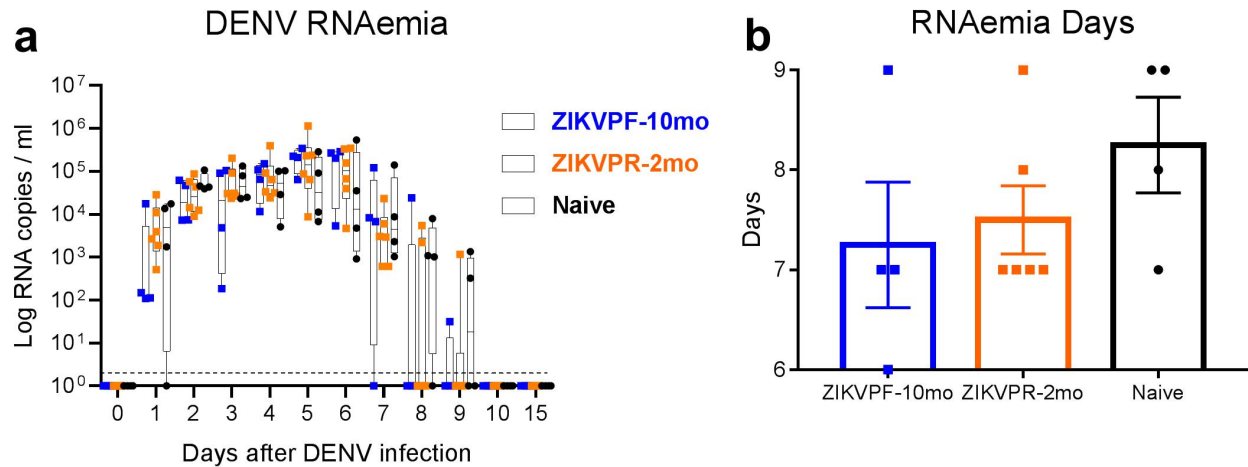

**Figure 2 | Previous ZIKV immunity does not contribute to an increase of DENV RNAemia.** (a) DENV-2 RNA kinetics in ZIKV-immune and naïve animals at baseline, day 1 to day 10, and day 15 after DENV infection. RNA genome copies (Log<sub>10</sub>) per ml of serum were measured by qRT-PCR. Symbols represent individual animals per cohort: blue squares (ZIKVVPF-10mo), orange squares (ZIKVPR-2mo) and black circles (Naïve). Box and whiskers show the distribution of log-transformed values per group per timepoint. Boxes include the mean value per group while whiskers depict the minimum and maximum values for each group. Cutted line mark the limit of detection (20 genomes copies). Statistically significant differences between groups were determined using Two-Way Anova adjusted for Tukey's multiple comparisons test including 12 families, and 3 comparisons per family. (b) Total days that DENV-2 RNAemia was detected for each animal within cohorts. Bars represent mean days per cohort.

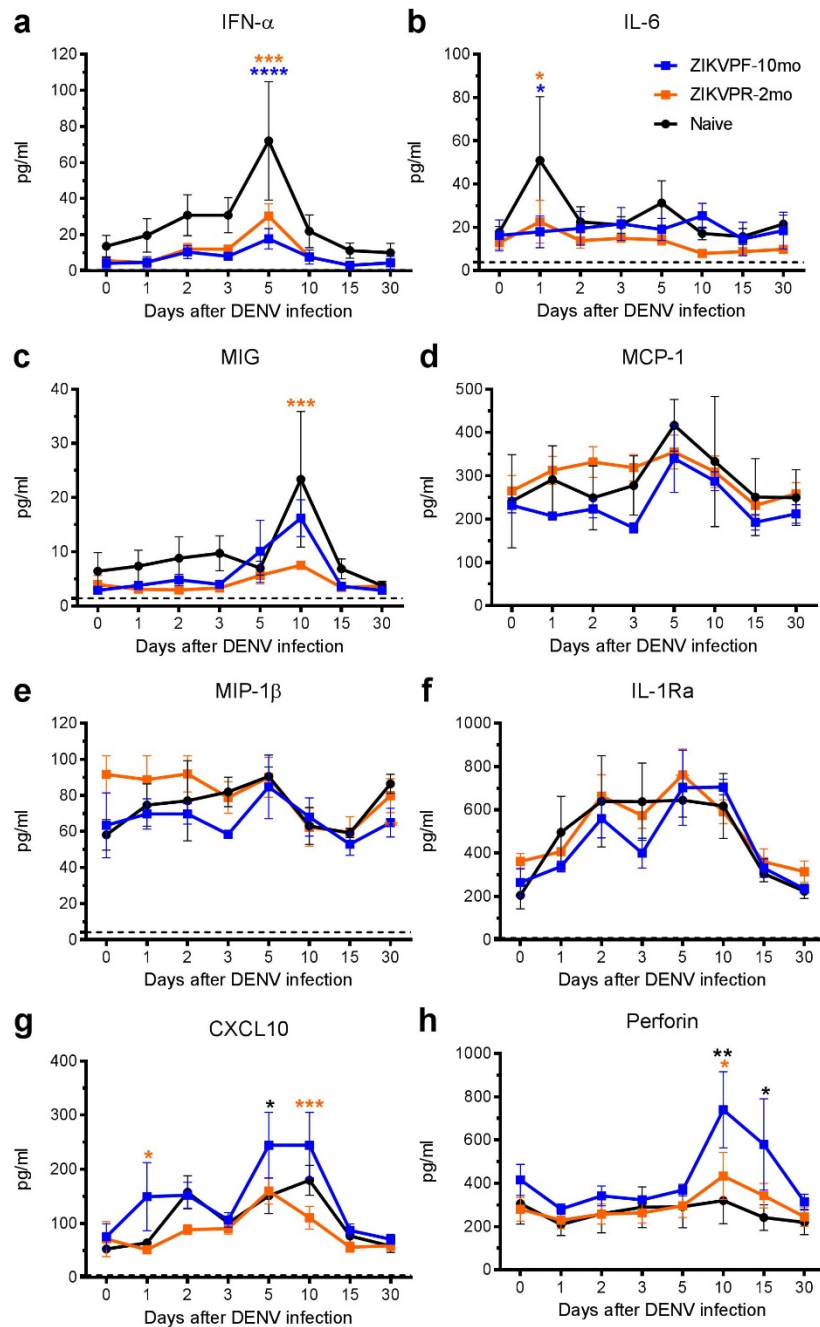

**Figure 3 | ZIKV immunity does not exacerbate levels of pro-inflammatory cytokines.**

Cytokines and chemokines expression levels were determined in serum (pg/ml) by multiplex bead assay (Luminex) at baseline, 1, 2, 3, 5, 10, 15 and 30 days after DENV infection. The panel includes: (a) interferon alpha (IFN- $\alpha$ ), (b) interleukin-6 (IL-6), (c) monokine induced by IFN-gamma (MIG/CXCL9), (d) monocyte chemoattractant protein 1 (MCP-1/CCL2), (e) macrophage inflammatory protein 1-beta (MIP-1 $\beta$ /CCL4), (f) IL-1 receptor antagonist (IL-1RA), (g) C-X-C motif chemokine 10 (CXCL10/IP-10) and (h) perforin. Symbols connected with lines represent mean expression levels detected of each cytokine/chemokine per cohort over time: blue squares (ZIKVPF-10mo), orange squares (ZIKVPR-2mo) and black circles (Naive). Error bars indicate the standard error of the mean (SEM) for each cohort per timepoint. Dashed line mark the limit of

detection for each individual cytokine/chemokine. Statistically significant differences between groups were calculated using Two-Way Anova adjusted for Tukey's multiple comparisons test including 8 families, and 3 comparisons per family. Significant multiplicity adjusted  $p$  values (\* <0.05, \*\* <0.01, \*\*\* <0.001, \*\*\*\* <0.0001) are shown colored representing the cohort against that particular point where is a statistically significant difference between groups.

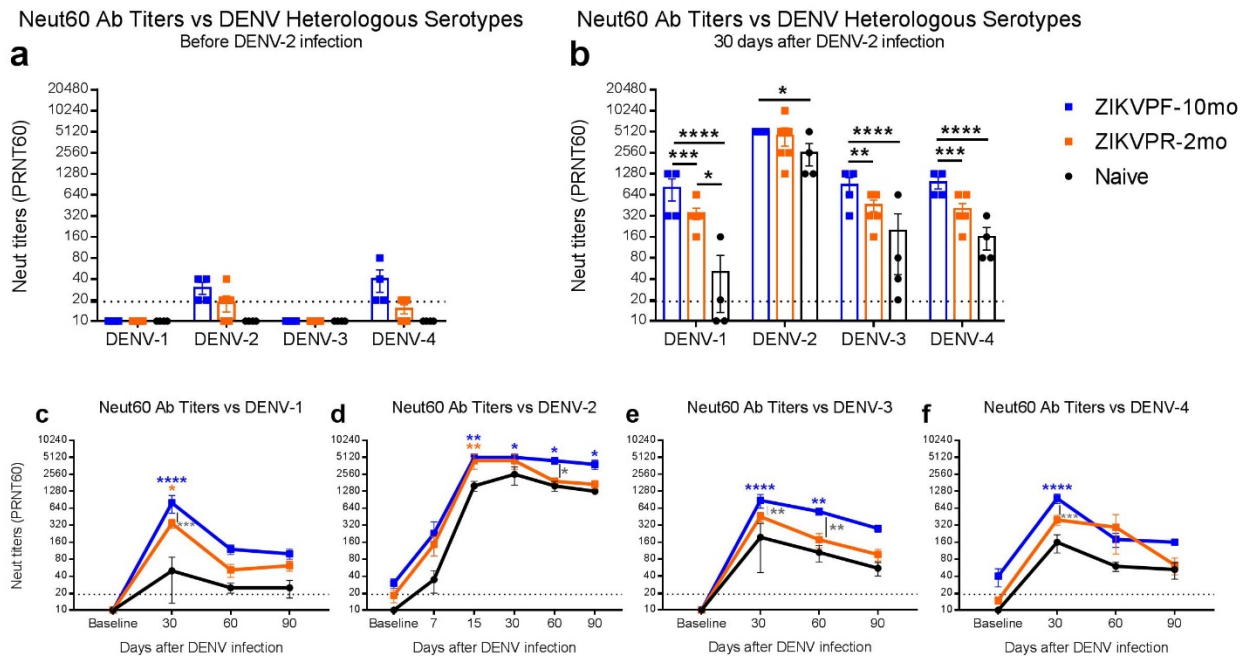

**Figure 4 | Neutralization of DENV-2 and heterologous serotypes is higher in magnitude and durability by animals with mid-convalescence to ZIKV.** The magnitude of the neutralizing antibody (NAb) response was determined (a) before and (b) 30 days after DENV infection by Plaque Reduction Neutralization Test (PRNT) against all DENV serotypes. (c-f) The durability of the neutralizing response was assessed measuring NAb titers up to 90 dpi against all DENV serotypes. Symbols connected with full lines indicate mean levels of NAb titers detected per cohort over time: blue squares (ZIKVVPF-10mo), orange squares (ZIKVPR-2mo) and black circles (Naïve). Error bars represent the standard error of the mean (SEM). PRNT60: NAb titer capable of reduce 60% or more of DENV serotypes plaque-forming units (pfu) compared with the mock (control of virus without serum). A PRNT60 1:20 titer was considered positive, and <1:20 as a negative Neut titer. Dotted line mark <1:20 for negative results. Non-neutralizing titers (<1:20) were assigned with one-half of the limit of detection for graphs visualization (1:10). Statistically significant differences between groups were calculated using Two-Way Anova adjusted for Tukey's multiple comparisons test including 4 and 6 families for heterologous serotypes and DENV-2, respectively, and 3 comparisons per family. Significant multiplicity adjusted *p* values (\* <0.05, \*\* <0.01, \*\*\* <0.001, \*\*\*\* <0.0001) are shown. Blue and orange asterisks represent significant difference between the corresponded ZIKV immune groups and naive group, and gray asterisks indicate a significant difference between ZIKV immune groups.

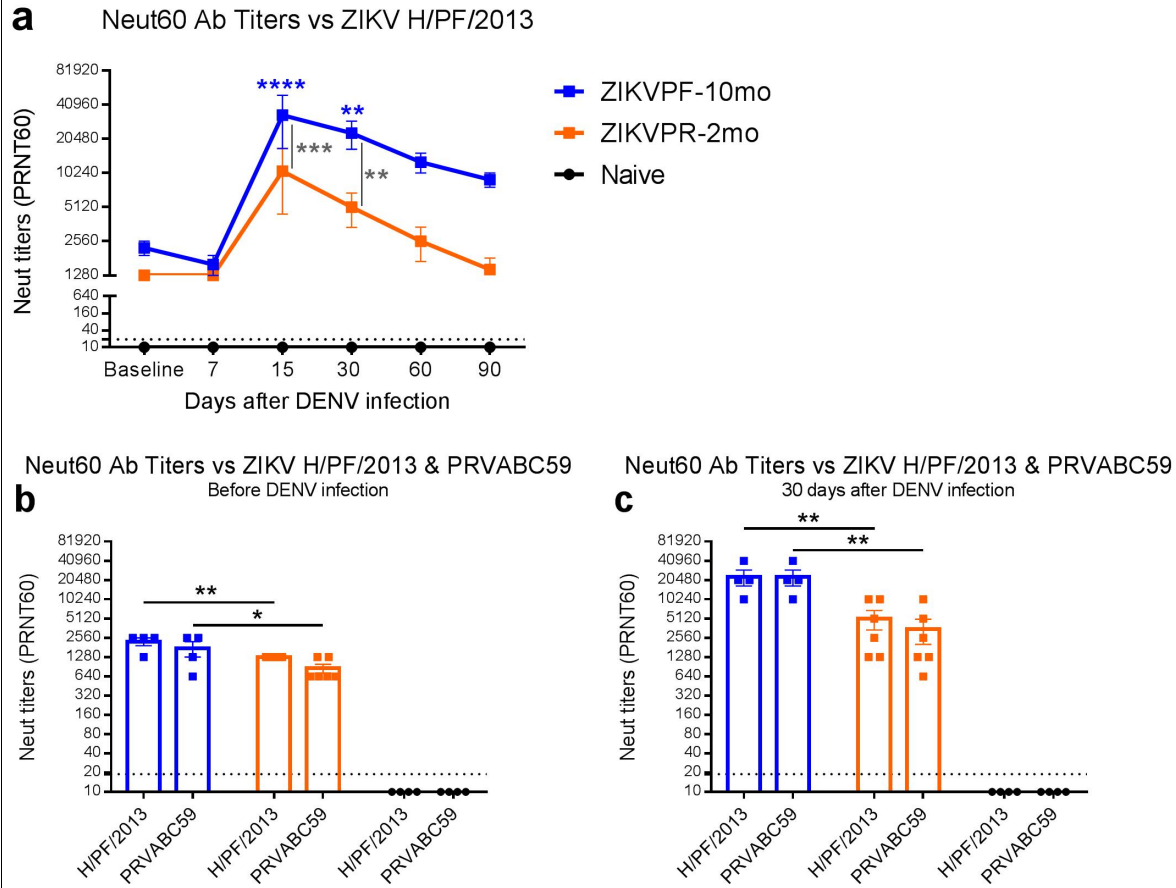

**Figure 5 | ZIKV neutralization is more potent and durable in animals with mid-convalescence to ZIKV and is independent of the pre-infecting ZIKV strain.** (a) NAb titers against ZIKV H/PF/2013 were determined by PRNT60 at baseline, 7, 15, 30, 60 and 90 days after DENV infection. Comparison of NAb titers between pre-infecting ZIKV strains was performed (b) before and (c) after DENV infection. Symbols connected with full lines indicate mean levels of NAb titers detected per cohort over time: blue squares (ZIKVVPF-10mo), orange squares (ZIKVPR-2mo) and black circles (Naïve). Error bars represent the standard error of the mean (SEM). PRNT60: NAb titer capable of reduce 60% or more of ZIKV strains plaque-forming units (pfu) compared with the mock (control of virus without serum). A PRNT60 1:20 titer was considered positive, and <1:20 as a negative Neut titer. Dotted line mark <1:20 for negative results. Non-neutralizing titers (<1:20) were assigned with one-half of the limit of detection for graphs visualization (1:10). Statistically significant differences between groups were calculated using Two-Way Anova adjusted for Tukey's multiple comparisons test including 6 and 2 families for panel a and b-c, respectively, and 3 comparisons per family. Significant multiplicity adjusted  $p$  values (\* <0.05, \*\* <0.01, \*\*\* <0.001, \*\*\*\* <0.0001) are shown. Blue and orange asterisks represent significant difference between the corresponded ZIKV-immune groups and naive group, and gray asterisks indicate a significant difference between ZIKV-immune groups.

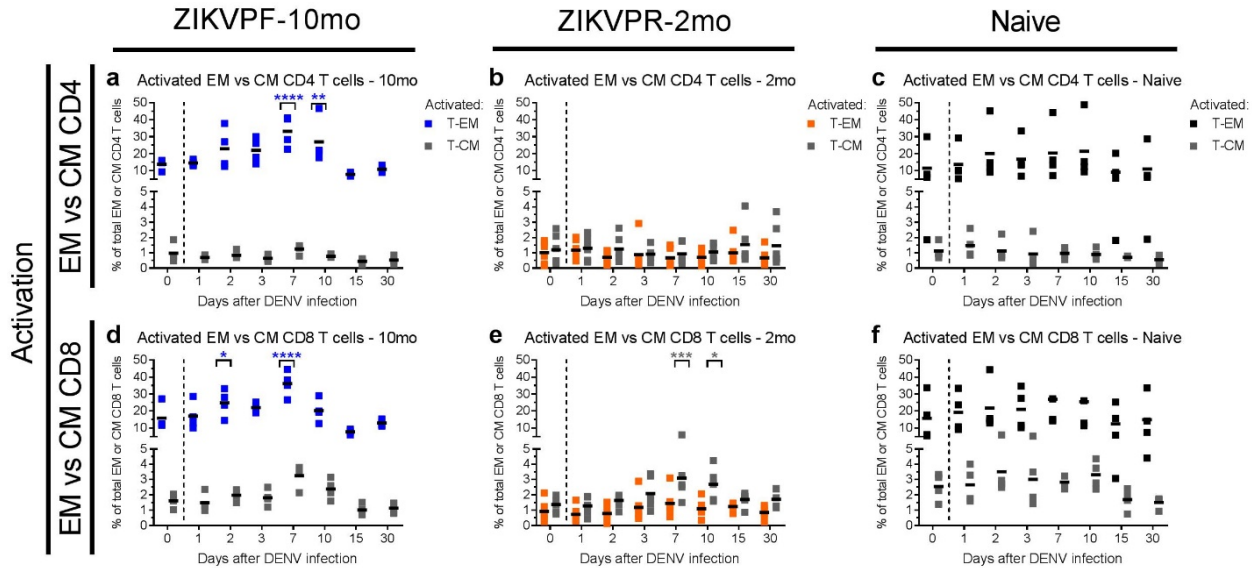

**Figure 6 | Effector and central memory T cells within CD4<sup>+</sup> and CD8<sup>+</sup> T cell compartments are activated after DENV infection.** Activation (CD69<sup>+</sup>) of effector memory (T-EM: CD3<sup>+</sup>CD4<sup>+</sup>CD28<sup>-</sup>CD95<sup>+</sup>) and central memory (T-CM: CD3<sup>+</sup>CD4<sup>+</sup>CD28<sup>+</sup>CD95<sup>+</sup>) T cells within (a-c) CD4<sup>+</sup> and (d-f) CD8<sup>+</sup> T cell compartments before and after DENV infection. Percent of cells were determined by immunophenotyping using flow cytometry (Supplementary Fig. 7 for gating strategy). Blue, orange and black squares represent T-EM for ZIKVPF-10mo, ZIKVPR-2mo and Naive, respectively. Gray squares represent T-CM for each group. Short black lines mark mean value for each group per timepoint. Cutted line divide % of T-EM and T-CM cells quantified before and after DENV infection. Statistically significant differences within groups were determined using Two-Way Anova adjusted for Dunnett's multiple comparisons test (comparison of each group response at each timepoint versus baseline of the same group) including 2 families, and 7 comparisons per family. Significant differences are reported as multiplicity adjusted *p* values (\* < 0.05, \*\* < 0.01, \*\*\* < 0.001, \*\*\*\* < 0.0001). Asterisks represent significant difference between the corresponded timepoint and baseline within the same group.



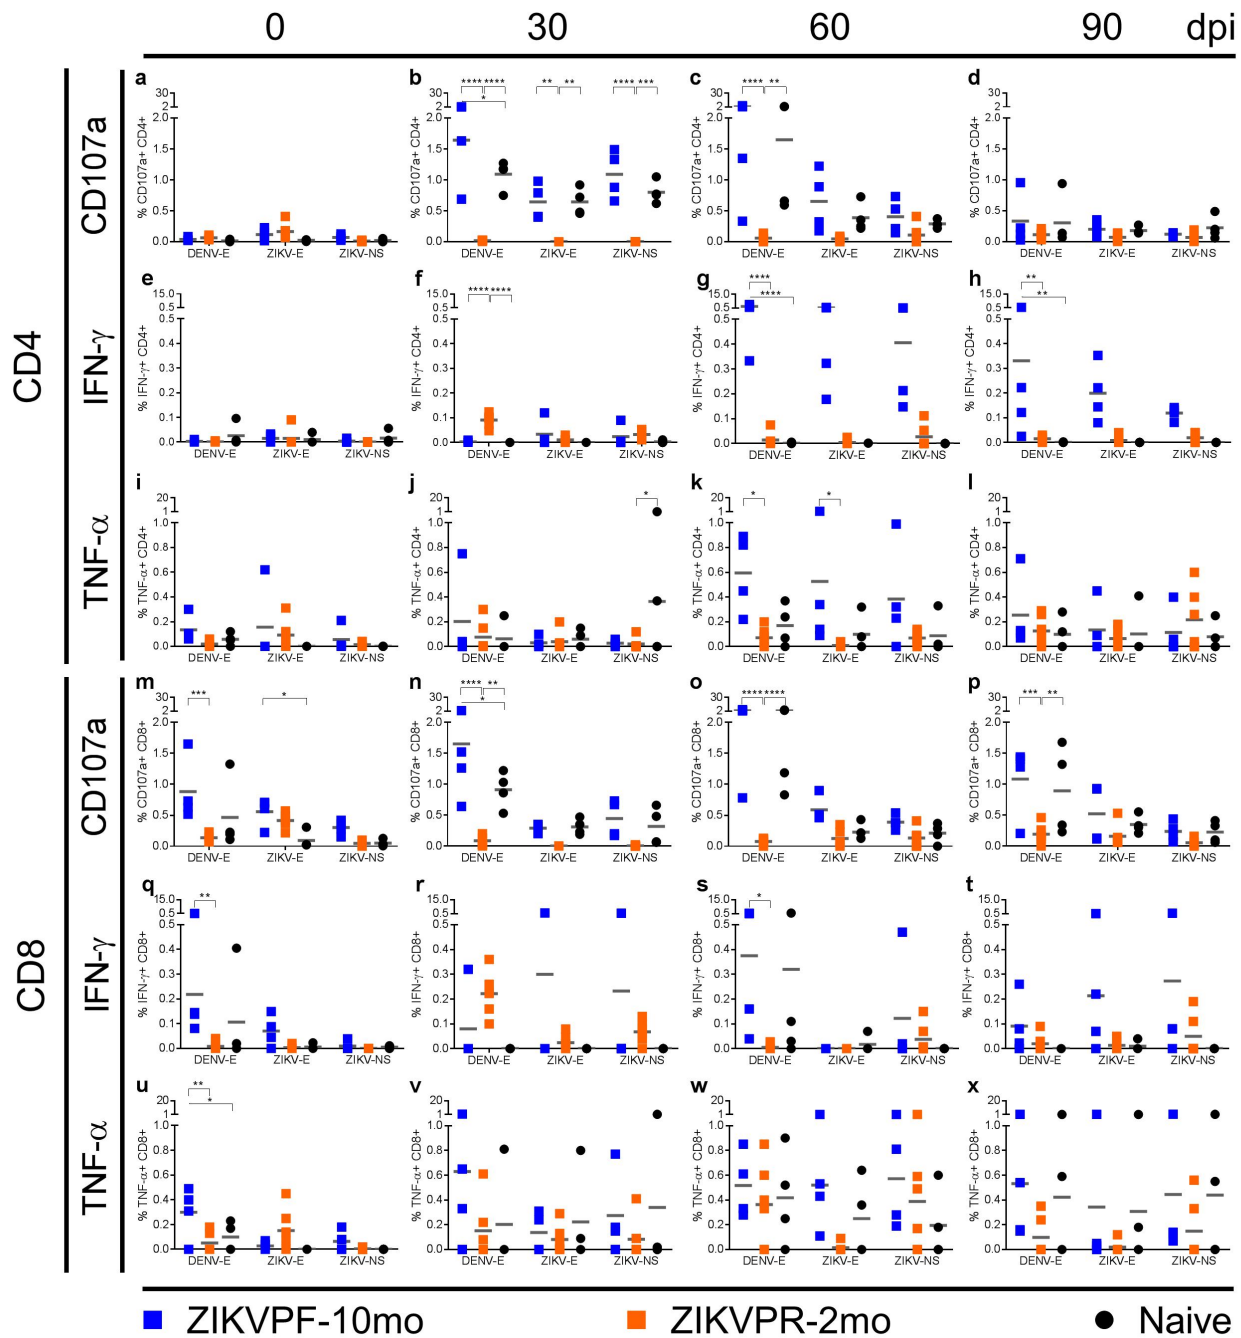

**Figure 7 | Longevity of ZIKV immunity shapes the functional response of CD4<sup>+</sup> and CD8<sup>+</sup> T cells.** T cell functional effector response was determined by the quantification (%) of (a-d; m-p) CD107a-expressing and (e-h; q-t) IFN- $\gamma$  or (i-l; u-x) TNF- $\alpha$  producing CD4<sup>+</sup> and CD8<sup>+</sup> T cells before (0) and 30, 60 and 90 days after DENV infection. Responses to several peptide pools that encode for DENV and ZIKV envelope (E) proteins or ZIKV non-structural (NS) protein were quantified. After antigenic stimulation intracellular cytokine staining was performed using flow cytometry analysis (Supplementary Fig. 14 for gating strategy). Individual symbols represent each animal per antigenic stimulation over time: blue squares (ZIKVPF-10mo), orange squares (ZIKVPR-2mo) and black circles (Naive). Short gray lines mark mean value for each group.

Statistically significant differences between groups were calculated using Two-Way Anova adjusted for Tukey's multiple comparisons test including 3 families, and 3 comparisons per family. Significant multiplicity adjusted  $p$  values (\* <0.05, \*\* <0.01, \*\*\* <0.001, \*\*\*\* <0.0001) are shown. Asterisks represent significant difference between indicated groups.

# Supplementary Information

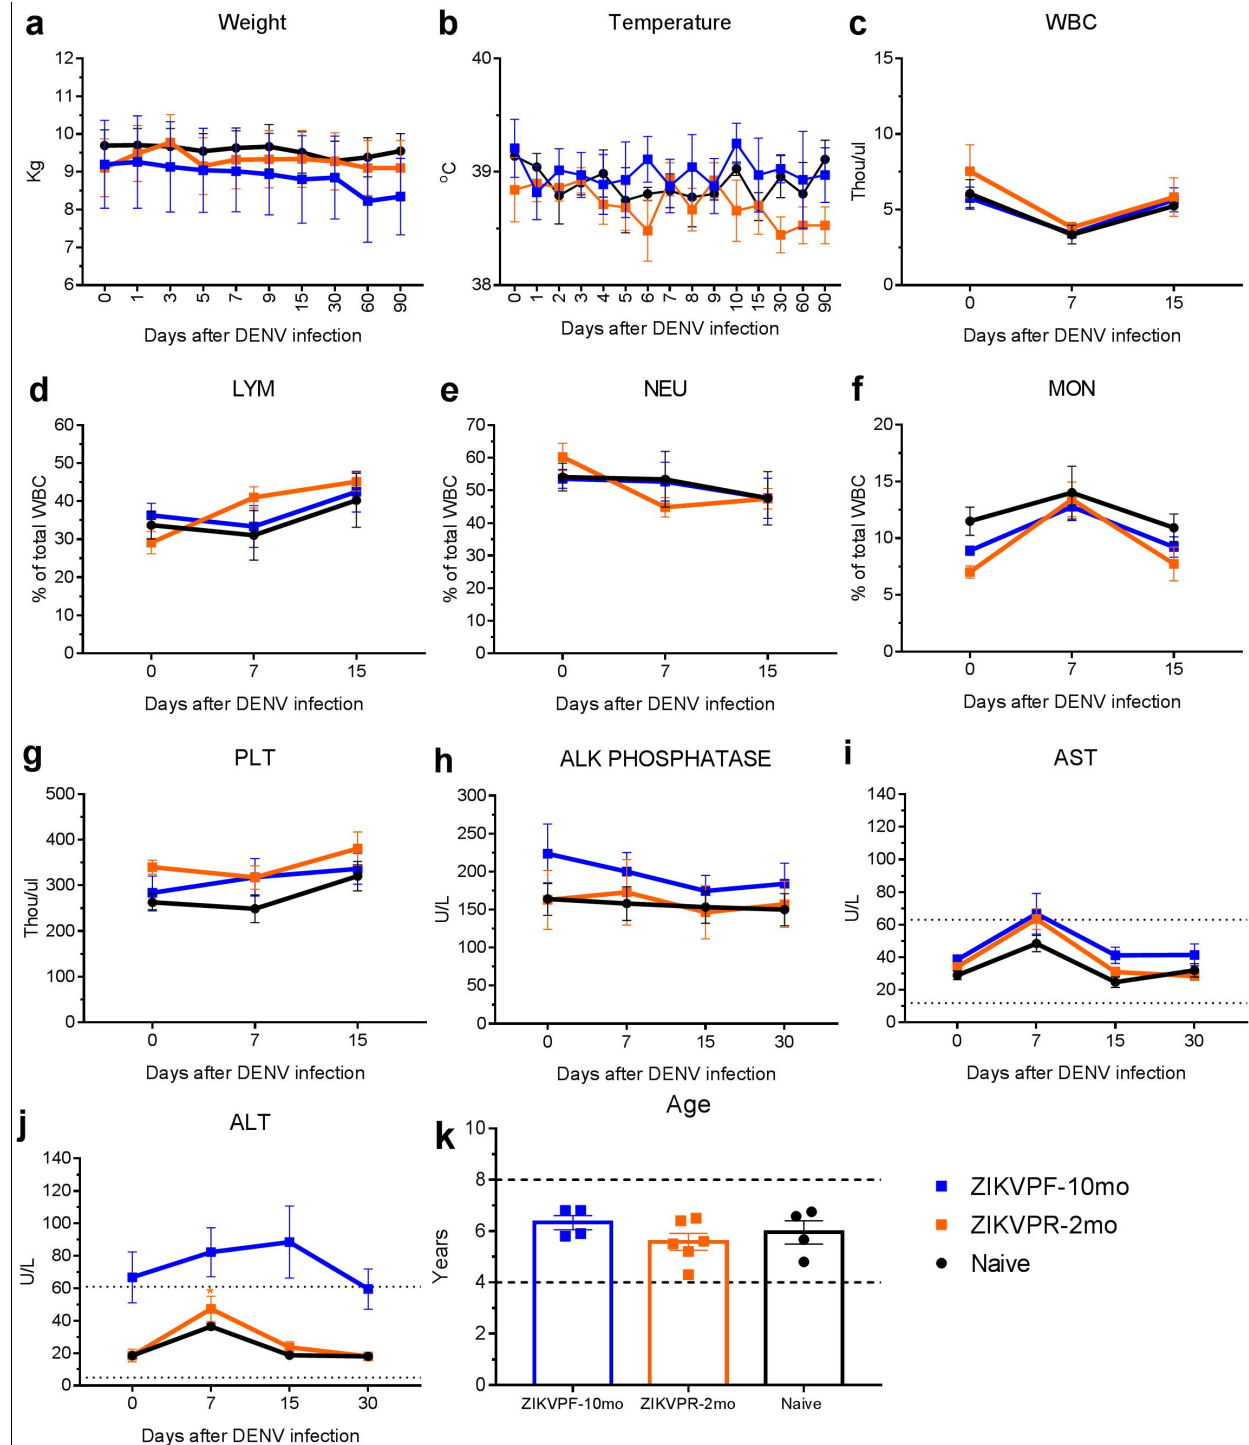

**Supplementary Figure 1 | Clinical status and vital signs kinetics in ZIKV-immune and naïve macaques. (a)** Weight (kg) was measured at baseline, 1, 3, 5, 7, 9, 15, 30, 60 and 90 dpi. **(b)**

Temperature (°C) was monitored with an infrared device at baseline, 1-10, 15, 30, 60 and 90 dpi. Complete blood cell counts (CBC) parameters (thou/ul and/or % of total WBC) such as (c) white blood cells (WBC), (d) lymphocytes (LYM), (e) neutrophils (NEU), (f) monocytes (MON), and (g) platelets (PLT) were screened at baseline, 7, and 15 dpi. Comprehensive metabolic panel (CMP) was performed to assess levels (U/L) of (h) alkaline phosphatase (ALK PHOSPHATASE) and liver enzymes (i) aspartate transaminase (AST), and (j) alanine transaminase (ALT) at baseline, 7, 15 and 30 dpi. Normal range of AST and ALT are depicted for reference. (k) Age of rhesus macaques are depicted including the range of young adults for reference. Symbols represent mean level detected for each parameter per cohort per timepoint: blue squares (ZIKVPPF-10mo), orange squares (ZIKVPR-2mo) and black circles (Naïve). Lines connect mean values detected over time. Error bars indicate the standard error of the mean (SEM) for each cohort per timepoint. Statistically significant differences between groups were determined using Two-Way Anova adjusted for Tukey's multiple comparisons test including 10, 15, 3, 4, and 3 families for panel a, b, c-g, h-j, and k, respectively, and 3 comparisons per family. For differences in ALT levels Two-Way Anova Dunnett's multiple comparisons test (comparison of each group response at each timepoint versus baseline of the same group) was performed including 3 families, and 3 comparisons per family due to divergence of non-specific levels between cohorts at baseline. Statistically differences are reported as multiplicity adjusted  $p$  values (\* <0.05).

## DENV-2 RNAemia - Area Under the Curve

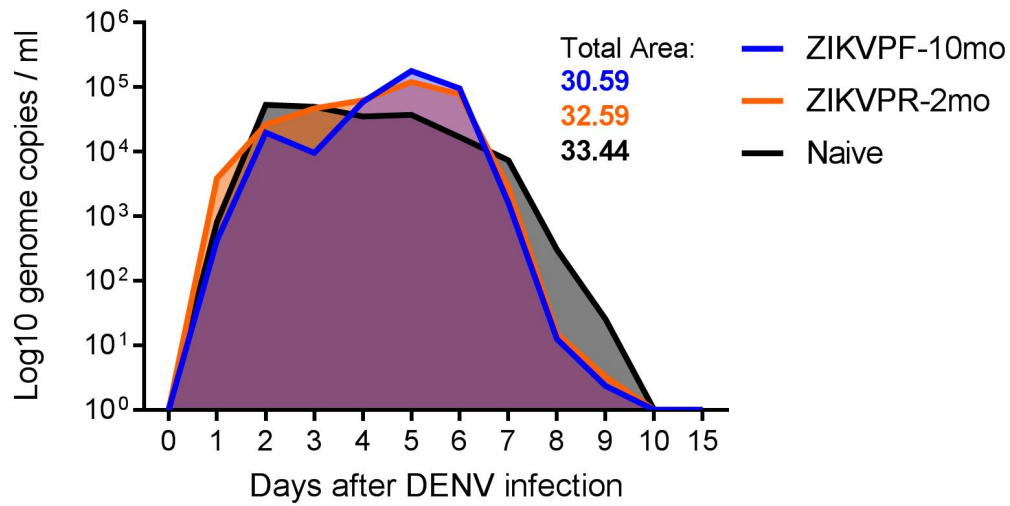

**Supplementary Figure 2 | Previous ZIKV immunity modulates DENV RNAemia kinetics and is associated with a lower area under the curve.** The area under the curve (AUC) was calculated using log-transformed values of DENV-2 RNAemia in ZIKV-immune and naïve animals. The total area by group is depicted on the graph as light blue, light orange and gray for ZIKVPF-10mo, ZIKVPR-2mo, and Naïve, respectively. Lines mark the mean value of genome copies per group per timepoint. A value of 1 was assigned to all samples below the LOD in order to calculate the means.

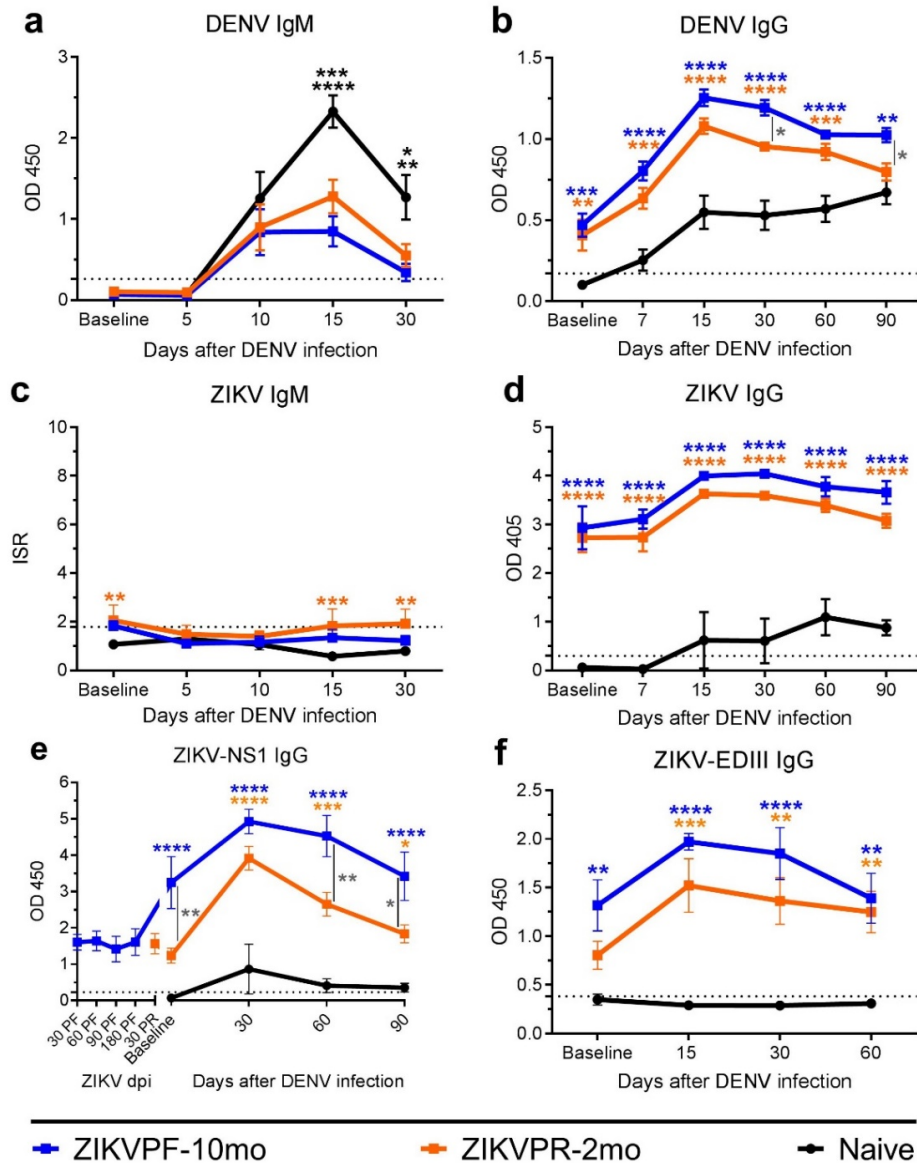

**Supplementary Figure 3 | Serological cross-reactivity is boosted by ZIKV immunity.** Levels of DENV (a) IgM and (b) IgG, and ZIKV (c) IgM, (d) IgG, (e) NS1-IgG and (f) EDIII-IgG were measured by ELISA at multiple timepoints before and after DENV infection. Symbols connected with full lines represent mean levels of Abs detected per cohort over time: blue squares (ZIKVPR-10mo), orange squares (ZIKVPR-2mo) and black circles (Naive). Panel e includes additional timepoints before DENV infection for ZIKV-immune groups: 30, 60, 90 and 180 days after ZIKV (H/PF/2013) infection for the ZIKVPR-10mo group, and 30 days after ZIKV (PRVABC59) infection for the ZIKVPR-2mo group. Error bars indicate the standard error of the mean (SEM) and dotted line mark the limit of detection for each individual ELISA. Results were read at OD 450, 405 or using ISR (Immune Status Ratio) following manufacturer's instructions. Statistically significant differences between groups were calculated using Two-Way Anova adjusted for Tukey's multiple comparisons test including 5, 6, 9, and 4 families, and 3 comparisons per family. Significant multiplicity adjusted  $p$  values (\* < 0.05, \*\* < 0.01, \*\*\* < 0.001, \*\*\*\* < 0.0001) are shown. Blue and orange asterisks represent significant difference between the corresponded ZIKV immune groups and naive group, and gray asterisks indicate a significant difference between ZIKV immune groups.

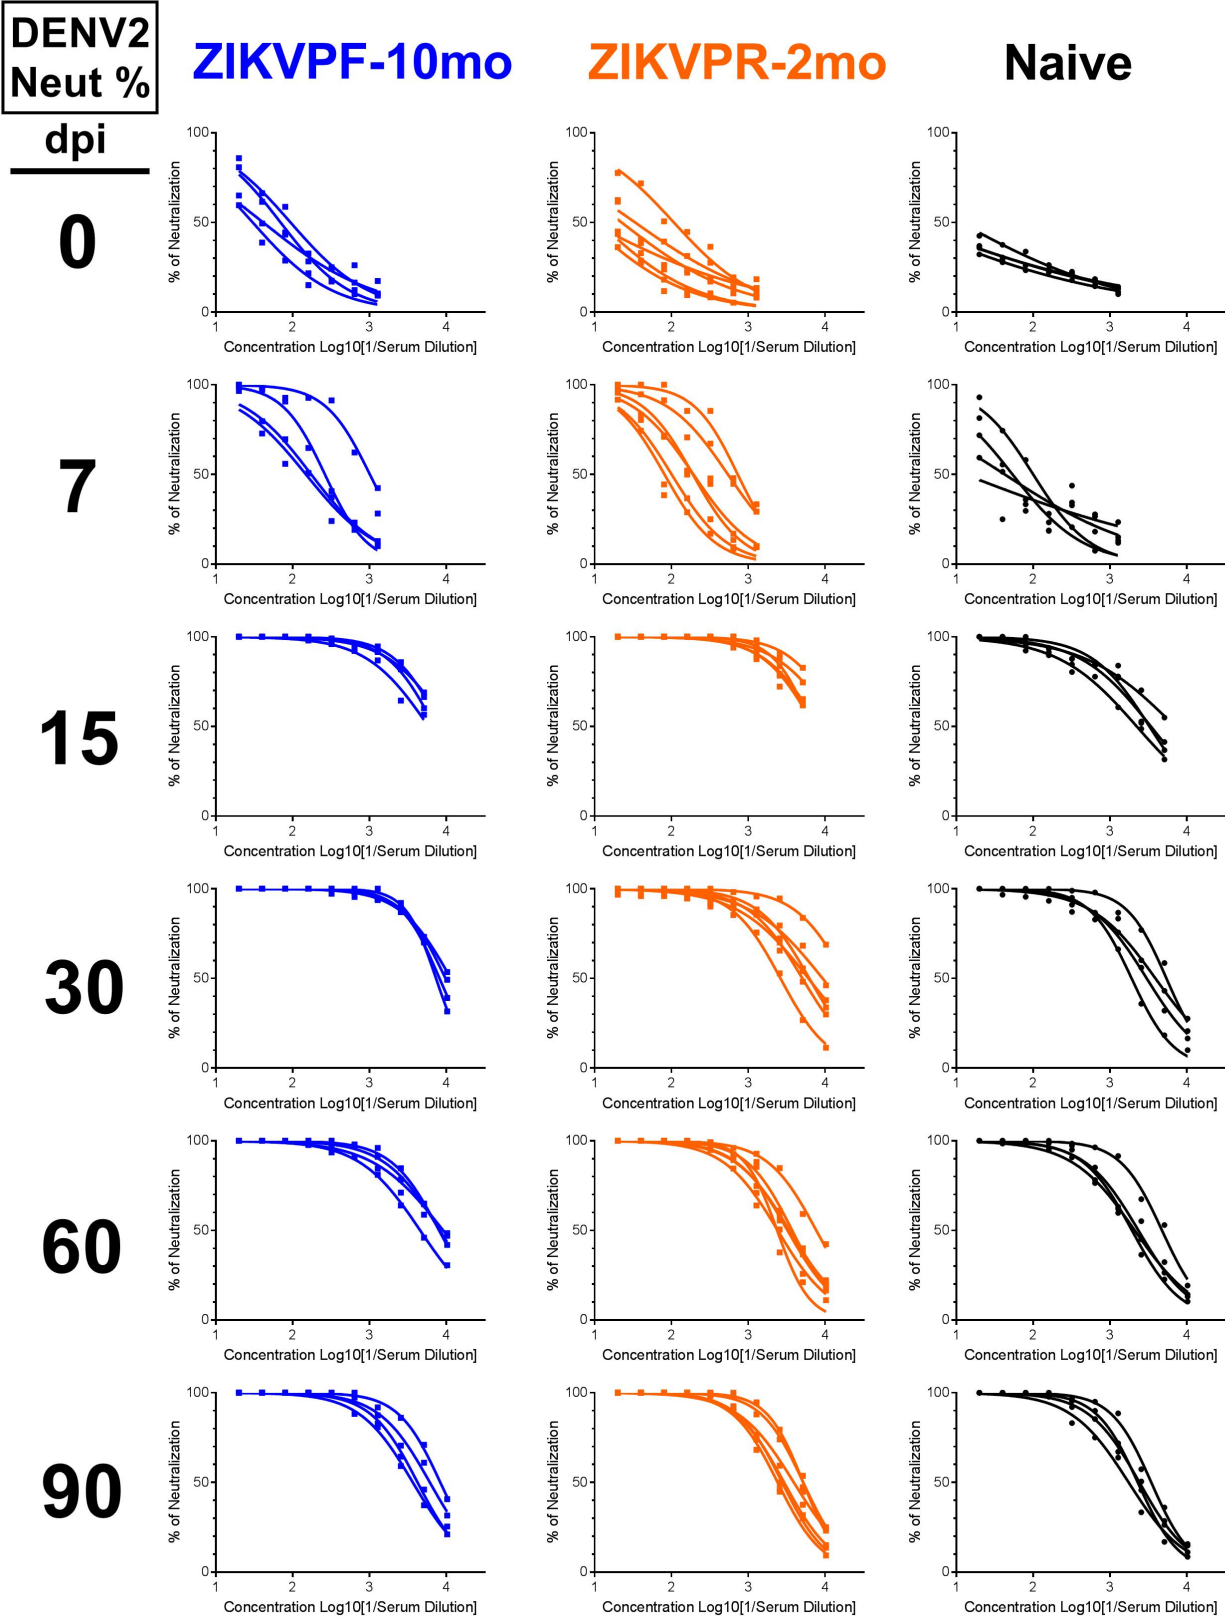

**Supplementary Figure 4 | Neutralization kinetics against DENV-2 of ZIKV middle- and early-convalescent, and naive animals. Percentage of DENV-2 neutralization of each animal per**

group calculated by the transformation of PRNT60 Neut 2-fold titers into Log<sub>10</sub> (1/serum dilution), and sigmoidal-dose response curves were generated. Each column of panels represent the % of DENV-2 neutralization for each group (ZIKVPF-10mo: blue squares/curves; ZIKVPR-2mo: orange squares/curves; Naïve: black circles/curves) and each row of panels represent a timepoint before and after DENV infection (baseline, 7, 15, 30, 60, 90 dpi).



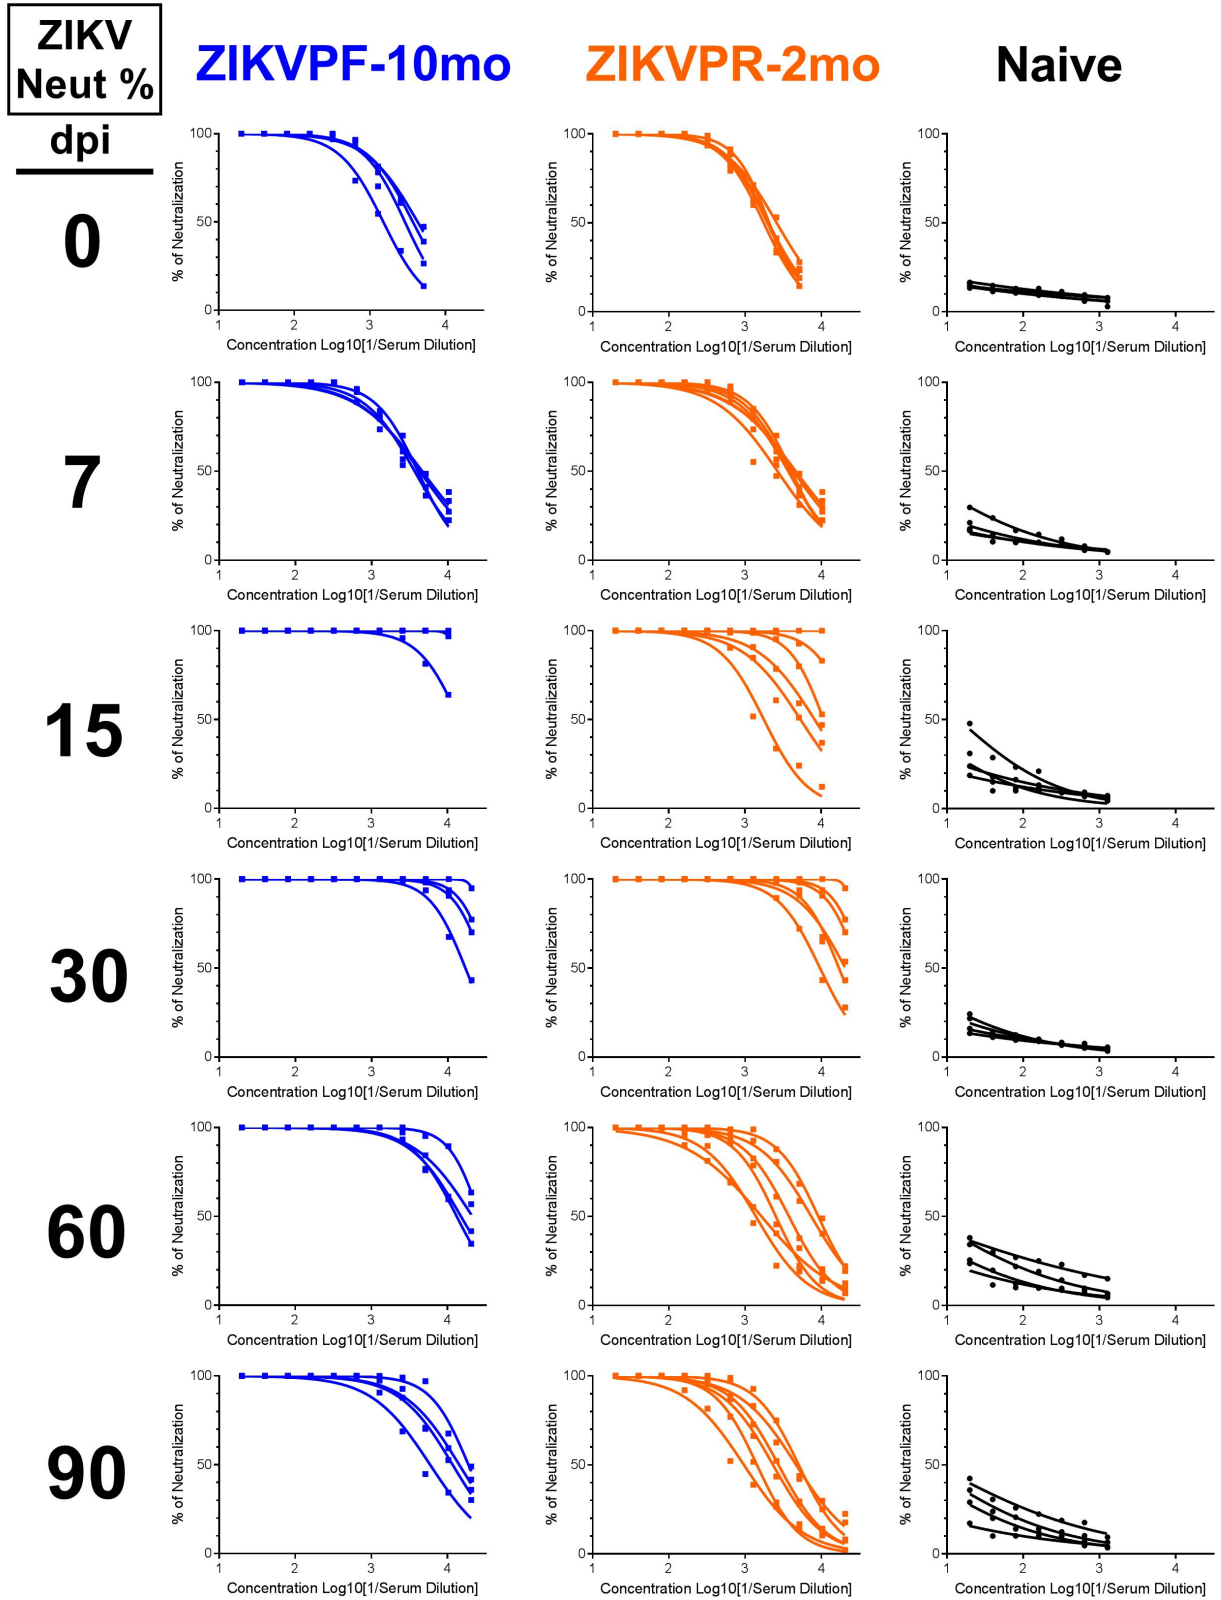

**Supplementary Figure 5 | Neutralization kinetics against ZIKV of ZIKV middle- and early-convalescent animals, and naïve animals. Percentage of ZIKV (H/PF/2013) neutralization of**

each animal per group calculated by the transformation of PRNT60 Neut 2-fold titers into Log<sub>10</sub> (1/serum dilution), and sigmoidal-dose response curves were generated. Each column of panels represent the % of ZIKV neutralization for each group (ZIKVVF-10mo: blue squares/curves; ZIKVPR-2mo: orange squares/curves; Naïve: black circles/curves) and each row of panels represent a timepoint before and after DENV infection (baseline, 7, 15, 30, 60, 90 dpi).

## Neut60 Ab Titers vs ZIKV H/PF/2013 & PRVABC59 After ZIKV infection

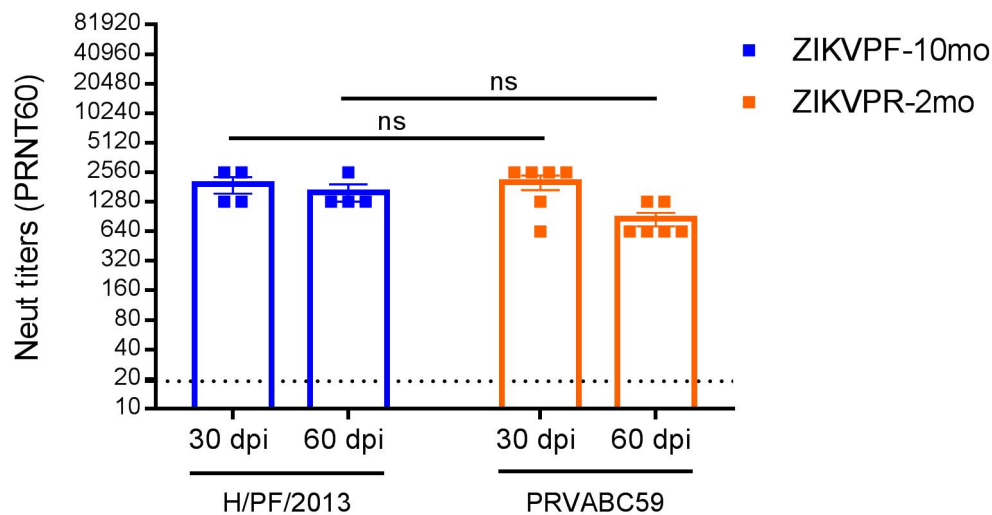

**Supplementary Figure 6 | Similar neutralizing titers induced by two different ZIKV strains in rhesus macaques.** NAb titers against H/PF/2013 and PRVABC59 ZIKV strains for ZIKVPR-10mo and ZIKVPR-2mo groups, respectively, were determined by PRNT60 at 30 and 60 after ZIKV infection. Symbols indicate levels of NAb titers detected per animal: blue squares (ZIKVPR-10mo), and orange squares (ZIKVPR-2mo). Error bars represent the standard error of the mean (SEM). PRNT60: NAb titer capable of reduce 60% or more of ZIKV strains plaque-forming units (pfu) compared with the mock (control of virus without serum). A PRNT60 1:20 titer was considered positive, and <1:20 as a negative Neut titer. Dotted line mark <1:20 for negative results. Statistically significant differences (ns: not significant) between two groups were calculated using Two-Way Anova corrected for Sidak's multiple comparisons test including 1 family, and 2 comparisons within the family.

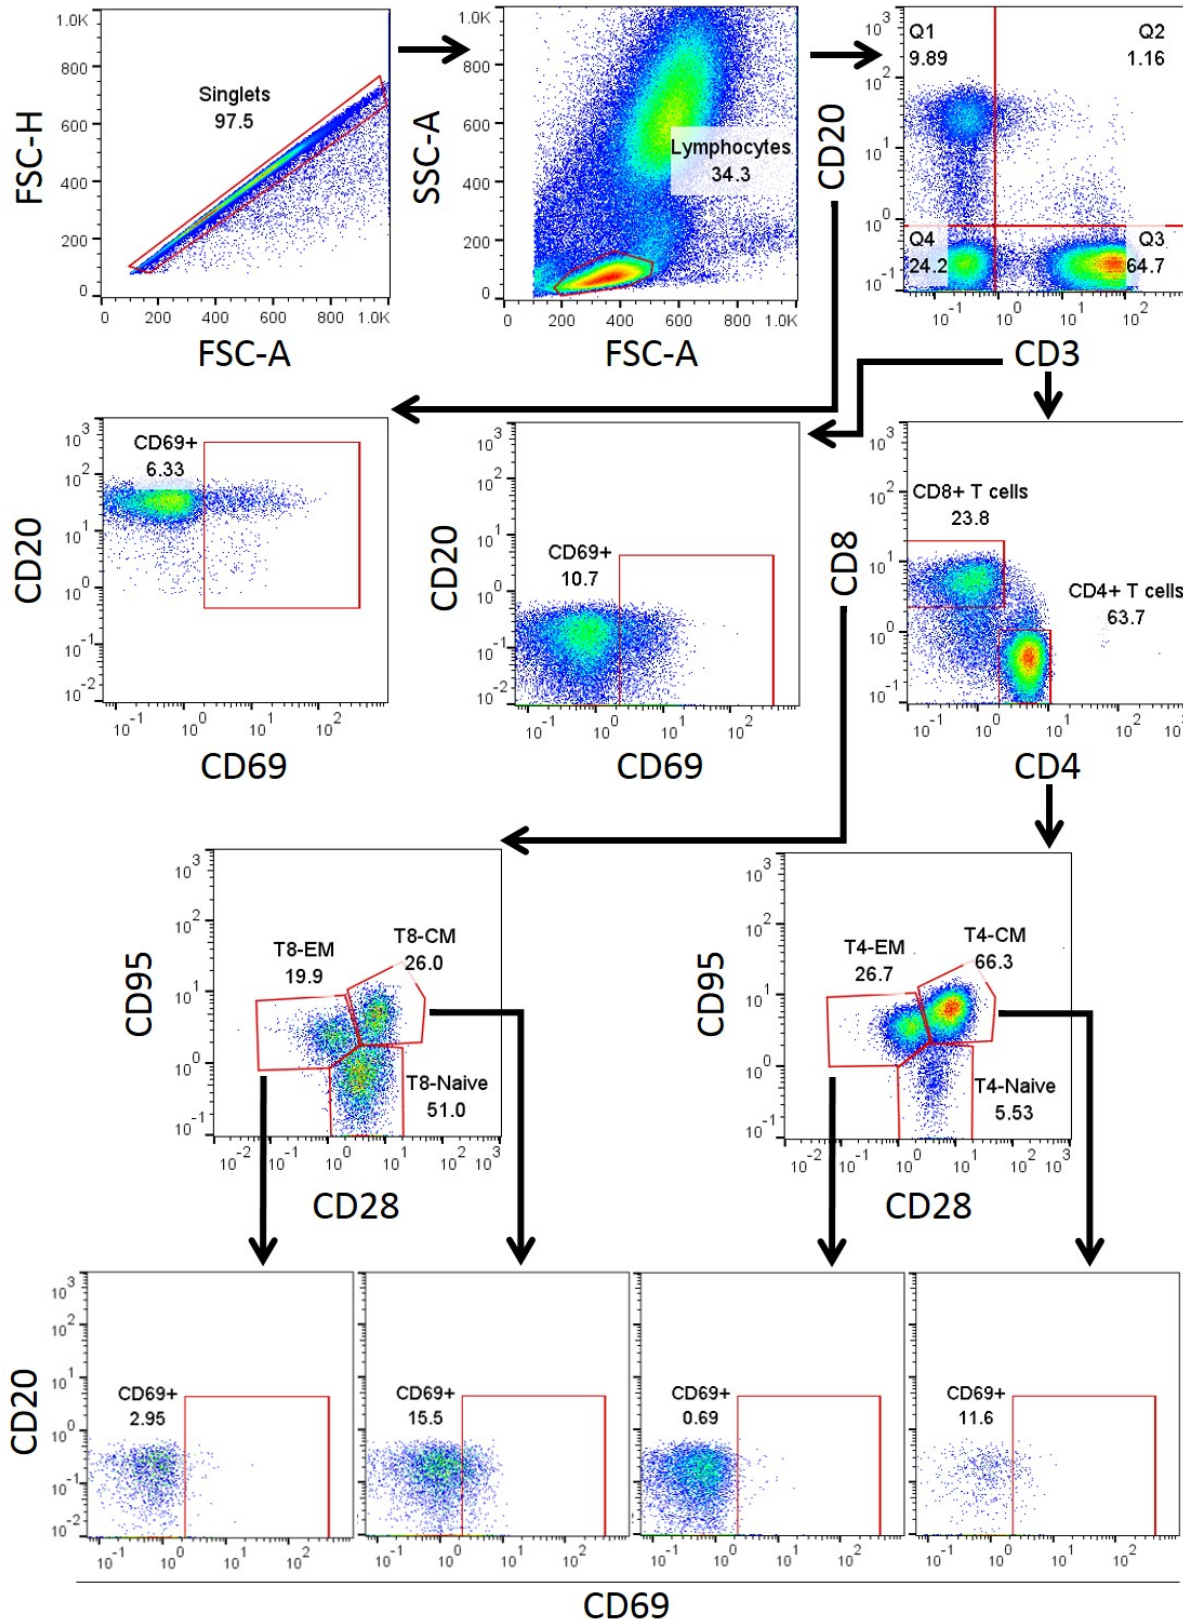

**Supplementary Figure 7 | Gating strategy for immunophenotyping and activation of B cells, and memory T cell subpopulations.**

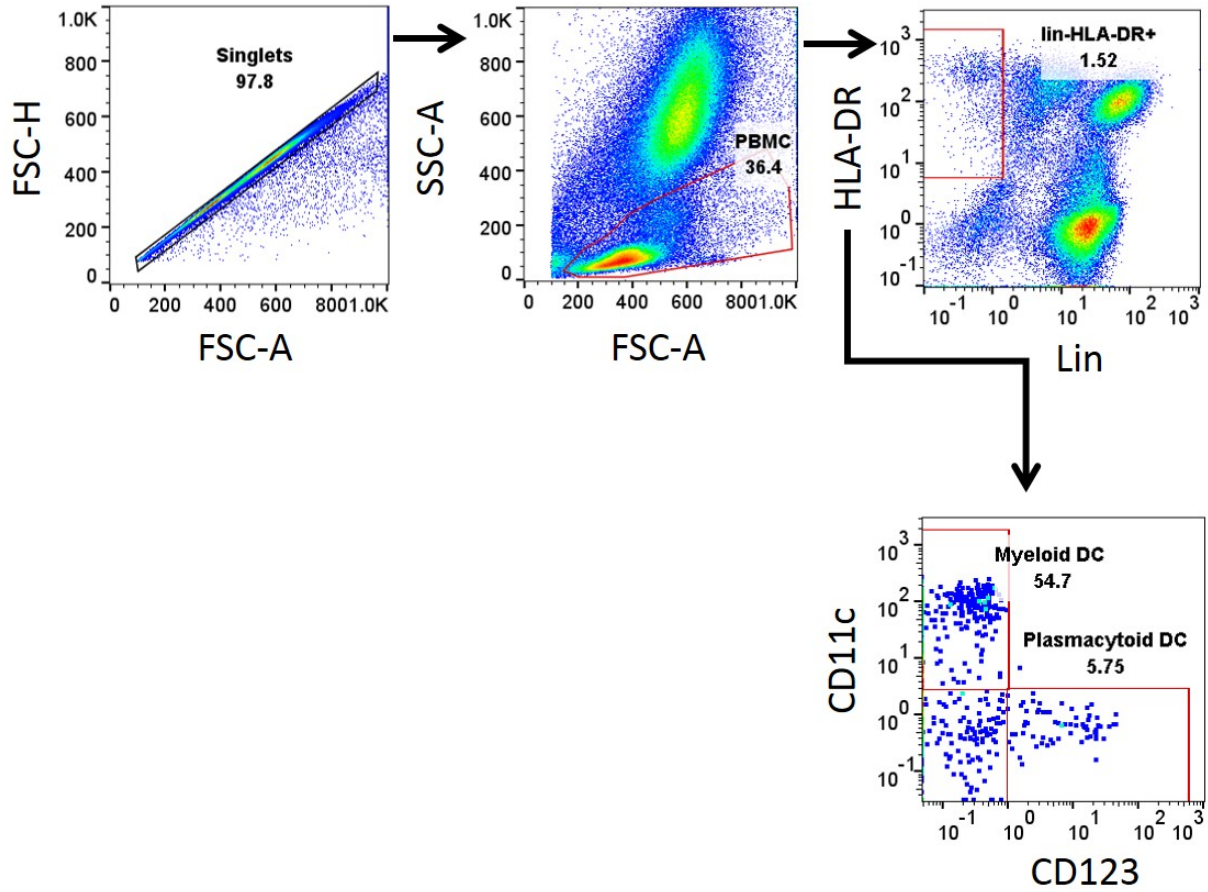

**Supplementary Figure 8 | Gating strategy for immunophenotyping of plasmacytoid and myeloid dendritic cells.**

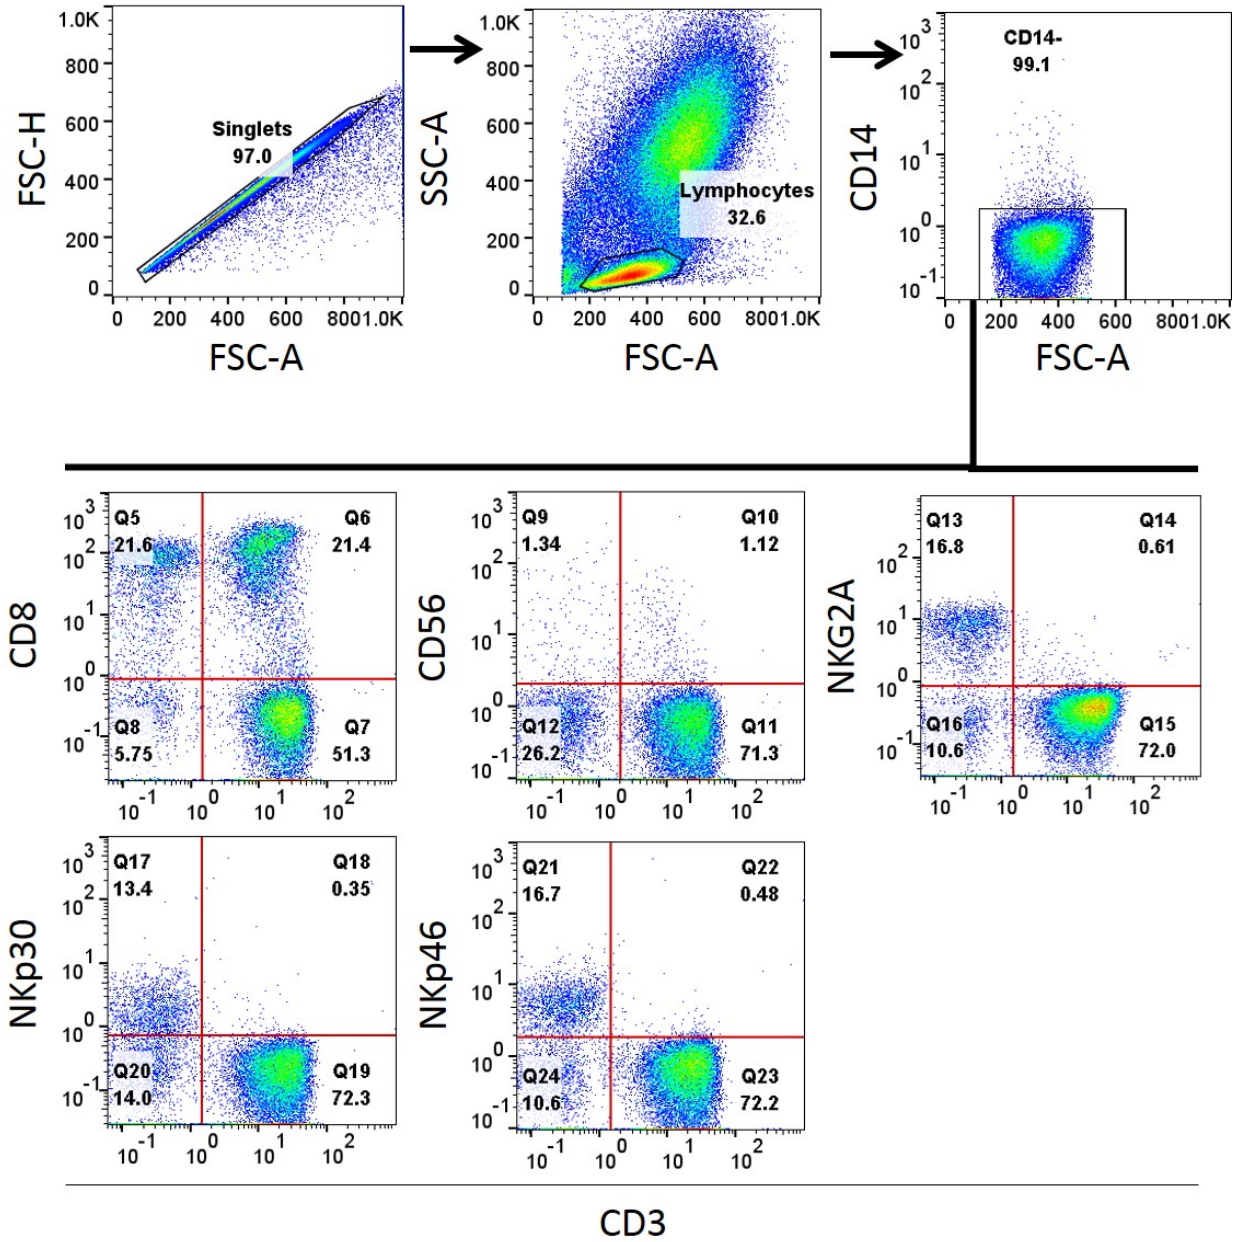

Supplementary Figure 9 | Gating strategy for Natural killer cell subpopulations.

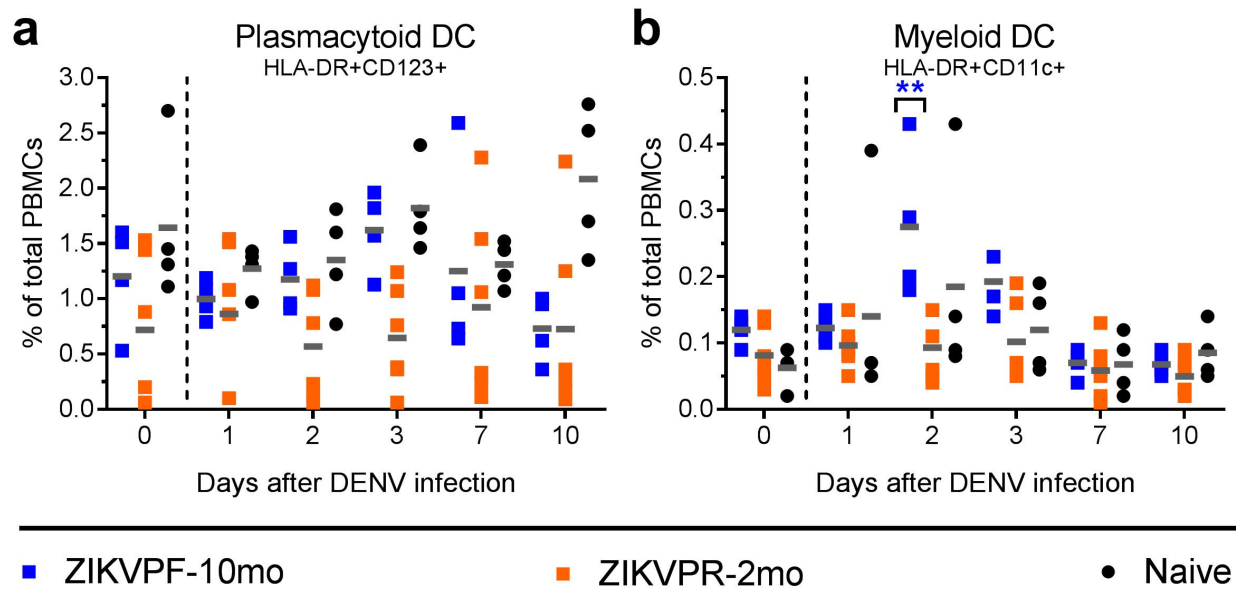

**Supplementary Figure 10 | Dendritic cells subsets modulation depends on the presence or absence of ZIKV immunity.** The frequency (% of total PBMCs) of dendritic cells (DCs) subsets including (a) plasmacytoid (pDCs: Lin-HLA-DR<sup>+</sup>CD123<sup>+</sup>) and (b) myeloid (mDCs: Lin-HLA-DR<sup>+</sup>CD11c<sup>+</sup>) was assessed before and up to 10 days after DENV infection by immunophenotyping using flow cytometry analysis. Symbols represent individual animals per group for each timepoint: blue squares (ZIKVVPF-10mo), orange squares (ZIKVPR-2mo) and black circles (Naive). Short gray lines depict mean value for each group detected overtime. Cutted line divide % of DCs quantified before and after DENV infection. Statistically significant differences within groups were determined using Two-Way Anova Dunnett's multiple comparisons test (comparison of each group response at each timepoint versus baseline of the same group) including 3 families, and 5 comparisons per family. Significant differences are reported as multiplicity adjusted *p* values (\* <0.05, \*\* <0.01, \*\*\* <0.001, \*\*\*\* <0.0001). Asterisks represent significant difference between the corresponded timepoint and baseline within the same group.

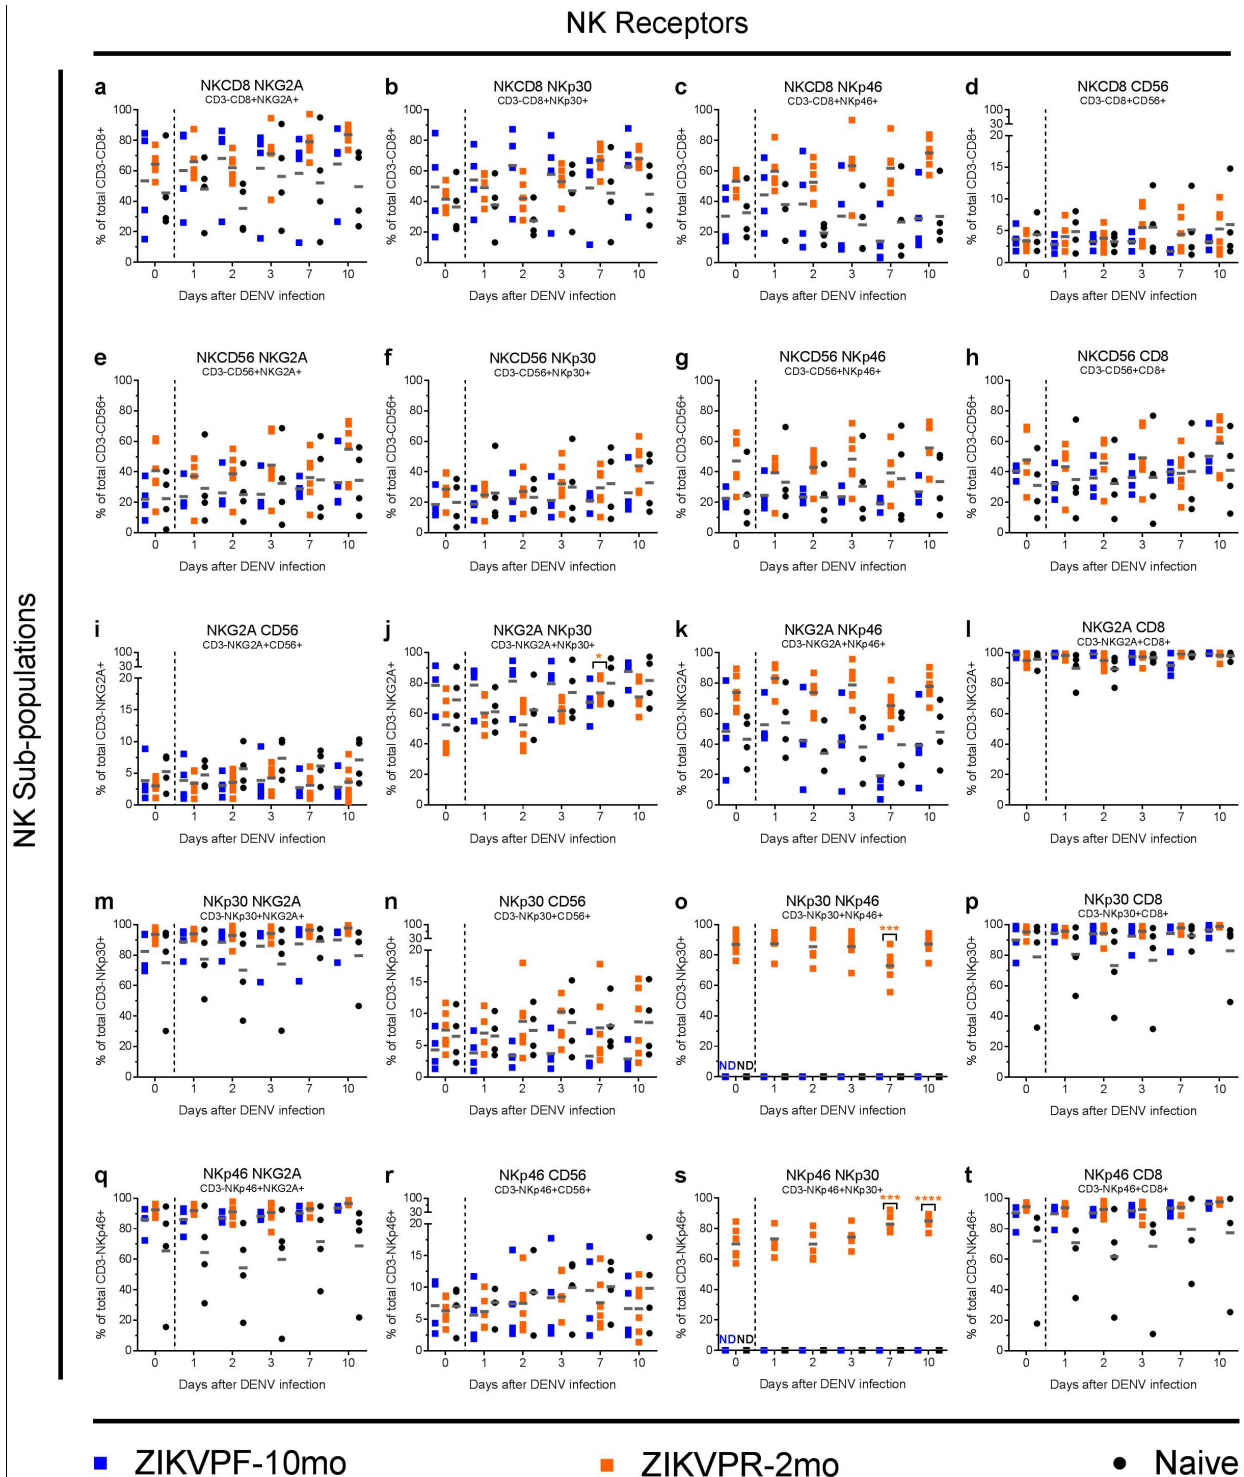

**Supplementary Figure 11 | Natural killer cell subpopulations and their differential receptors expression in presence or absence of ZIKV immunity.** Natural killer (NK) cell subpopulations and the relative expression of multiple NK receptors within each subpopulation: (a-d) NKCD8, (e-h) NKCD56, (i-l) NKG2A, (m-p) NKp30 and (q-t) NKp46 were quantified by immunophenotyping using flow cytometry analysis before and up to 10 days after DENV infection. Individual symbols represent each animal per group over time: blue squares (ZIKVPF-10mo), orange squares



(ZIKVPR-2mo) and black circles (Naïve). Short gray lines mark mean value for each group. Cutted line divide % of NK cells quantified before and after DENV infection. Statistically significant differences within groups were determined using Two-Way Anova Dunnett's multiple comparisons test (comparison of each group response at each timepoint versus baseline of the same group) including 3 families, and 5 comparisons per family. Significant differences are reported as multiplicity adjusted *p* values (\* <0.05, \*\* <0.01, \*\*\* <0.001, \*\*\*\* <0.0001). Asterisks represent significant difference between the corresponded timepoint and baseline within the same group. ND (Not Done) in panels 8o and 8s refers that for ZIKVPR-10mo and Naïve groups the NKp30<sup>+</sup>NKp46<sup>+</sup> and NKp46<sup>+</sup>NKp30<sup>+</sup> subpopulations were not measured.

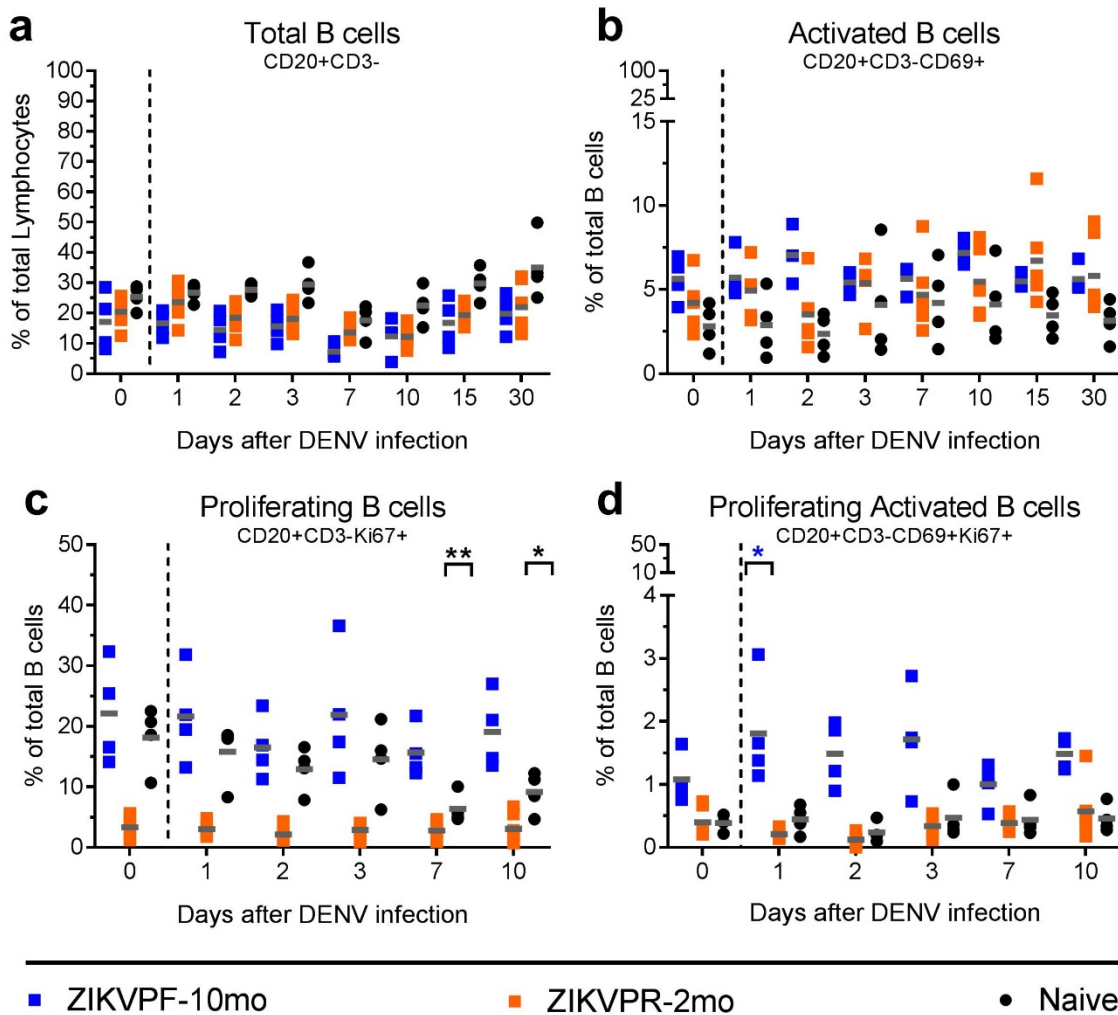

**Supplementary Figure 12 | B cells proliferation and activation levels are higher in ZIKV middle-convalescent macaques.** The (a) total (% of total Lymphocytes), (b) activated, (c) proliferating, and (d) proliferating/activated B cells (% of total B cells) were determined at baseline and following DENV infection by immunophenotyping using flow cytometry analysis. B cells proliferation and activation were monitored since baseline up to 10 and 30 dpi, respectively. Symbols represent individual animals per group for each timepoint: blue squares (ZIKVVPF-10mo), orange squares (ZIKVPR-2mo) and black circles (Naïve). Short gray lines depict mean value of B cells percent in each group of animals per timepoint. Cutted line divide % of B cells quantified before and after DENV infection. Statistically significant differences within groups were determined using Two-Way Anova Dunnett's multiple comparisons test (comparison of each group response at each timepoint versus baseline of the same group) including 3 families, and 7 and 5 comparisons per family in panels a-b and c-d, respectively. Significant differences are reported as multiplicity adjusted *p* values (\* <0.05, \*\* <0.01). Asterisks represent significant difference between the corresponded timepoint and baseline within the same group.

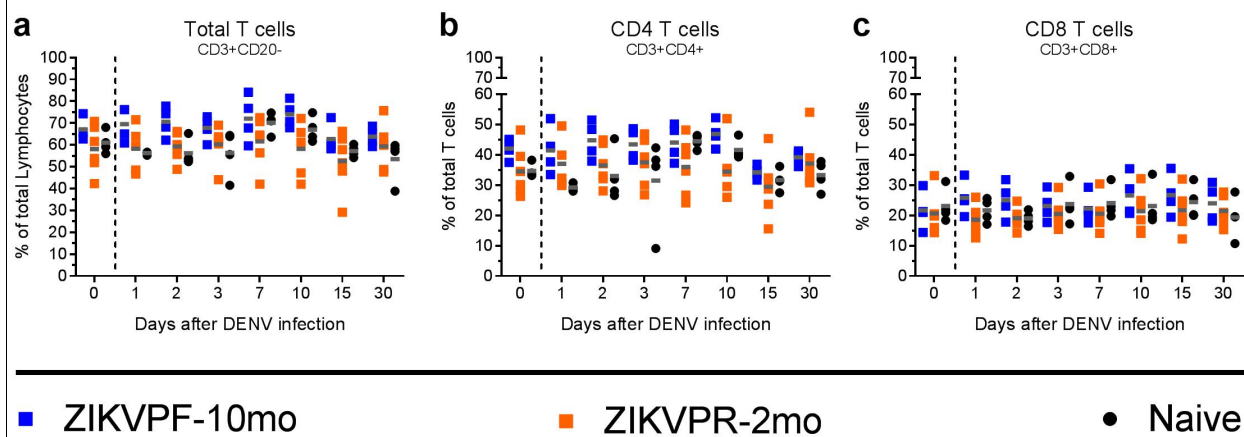

**Supplementary Figure 13 | T cells frequency before and after DENV infection.** The (a) total T cells (% of total Lymphocytes), (b) CD4<sup>+</sup> and (c) CD8<sup>+</sup> T cell compartments (% of total T cells) frequencies were quantified at baseline and following DENV infection up to 30 dpi by immunophenotyping using flow cytometry. Symbols represent individual animals per group for each timepoint: blue squares (ZIKVPF-10mo), orange squares (ZIKVPR-2mo) and black circles (Naïve). Short gray lines mark mean value of T cells percent in each cohort per timepoint. Cutted line divide % of T cells quantified before and after DENV infection. Statistically significant differences within groups were determined using Two-Way Anova Dunnett's multiple comparisons test (comparison of each group response at each timepoint versus baseline of the same group) including 3 families, and 7 comparisons per family.

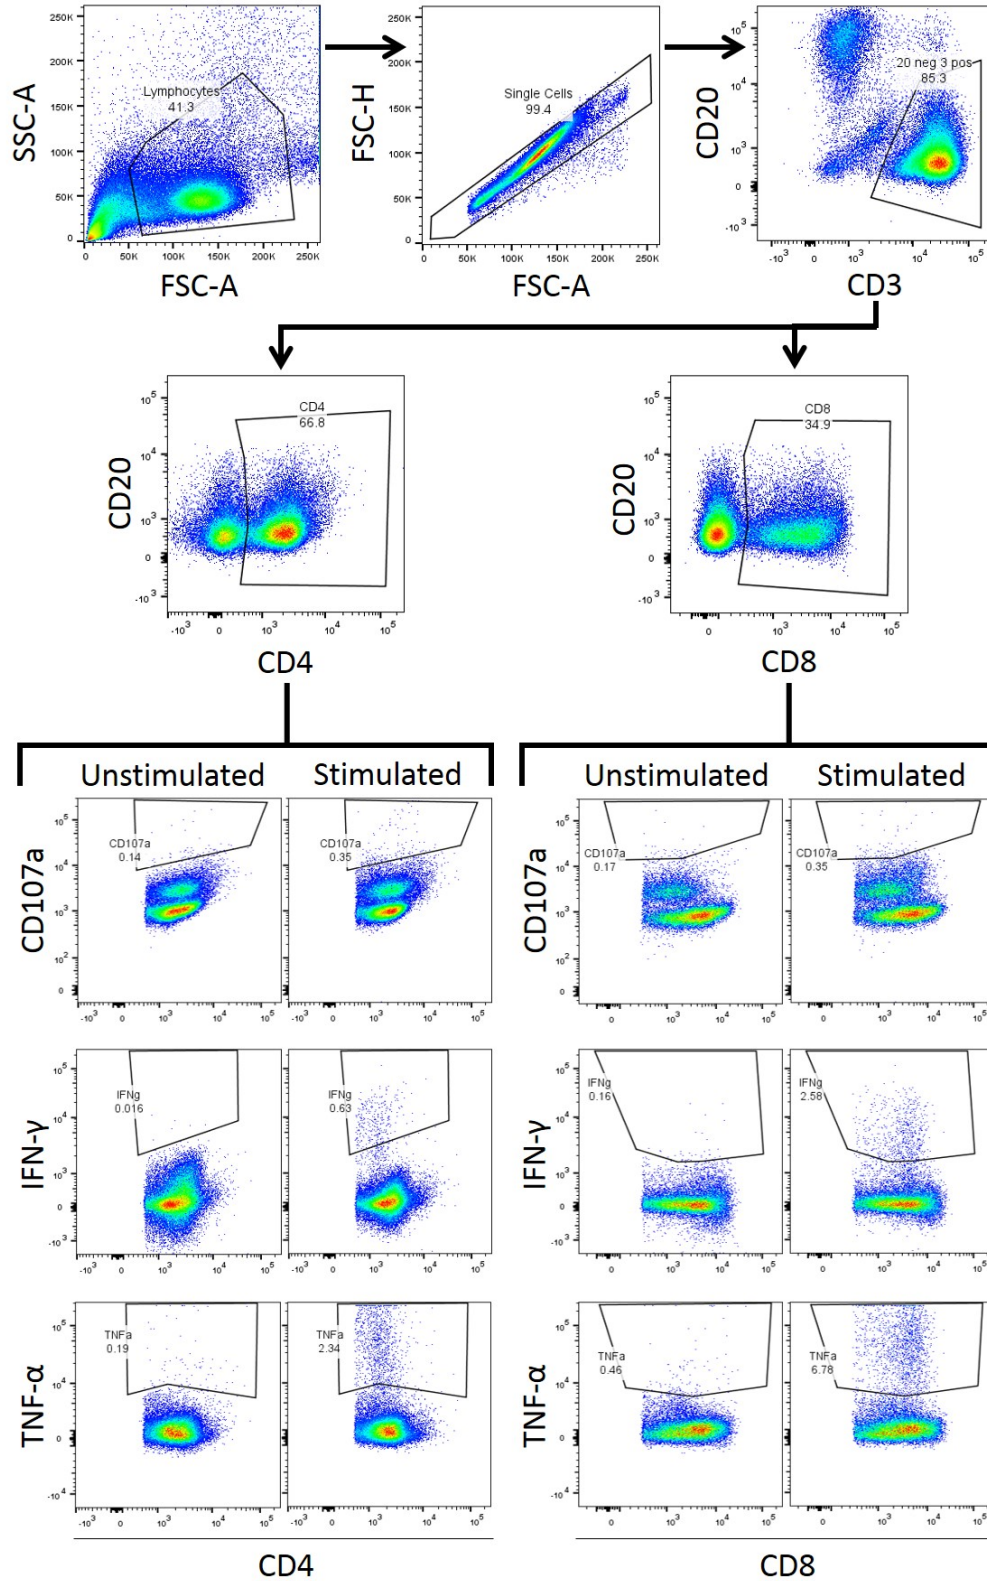

Supplementary Figure 14 | Gating strategy for CD4<sup>+</sup> and CD8<sup>+</sup> T cell functional response.

### Supplementary Table 1 | Sequence alignment and amino acid identity of ZIKV strains PRVABC59 and H/PF/2013.

|                                                                                                                                                                                |                                                                                                                                                                                                                                                                                                                                                                                                                                                                                                                                                                                                                                                                                                                                                                                                                                                                                                                                                                                                                                                                                                                                                                                                                                                                                                                                                                                                                                                                                                                                                                                                                                                                                                                   |
|--------------------------------------------------------------------------------------------------------------------------------------------------------------------------------|-------------------------------------------------------------------------------------------------------------------------------------------------------------------------------------------------------------------------------------------------------------------------------------------------------------------------------------------------------------------------------------------------------------------------------------------------------------------------------------------------------------------------------------------------------------------------------------------------------------------------------------------------------------------------------------------------------------------------------------------------------------------------------------------------------------------------------------------------------------------------------------------------------------------------------------------------------------------------------------------------------------------------------------------------------------------------------------------------------------------------------------------------------------------------------------------------------------------------------------------------------------------------------------------------------------------------------------------------------------------------------------------------------------------------------------------------------------------------------------------------------------------------------------------------------------------------------------------------------------------------------------------------------------------------------------------------------------------|
| <p>Pairwise alignment of both ZIKV strains sequences.<br/>(Sequences downloaded from ViPR database and global alignment was performed using Blosum62 in Genious Software).</p> | <p>&gt;99.99% amino acid identity</p>                                                                                                                                                                                                                                                                                                                                                                                                                                                                                                                                                                                                                                                                                                                                                                                                                                                                                                                                                                                                                                                                                                                                                                                                                                                                                                                                                                                                                                                                                                                                                                                                                                                                             |
| <p>Envelope (E) protein region of both ZIKV strains.</p>                                                                                                                       | <p>Identical</p>                                                                                                                                                                                                                                                                                                                                                                                                                                                                                                                                                                                                                                                                                                                                                                                                                                                                                                                                                                                                                                                                                                                                                                                                                                                                                                                                                                                                                                                                                                                                                                                                                                                                                                  |
| <p>Amino acids residues changes between both ZIKV strains. Marked in red within sequences.<br/><br/>From ZIKV-PR → ZIKV-PF</p>                                                 | <p>T<sub>80</sub> → I (Capsid)<br/>G<sub>892</sub> → W (NS1)<br/>V<sub>2611</sub> → A (NS5)<br/>V<sub>2634</sub> → M (NS5)</p>                                                                                                                                                                                                                                                                                                                                                                                                                                                                                                                                                                                                                                                                                                                                                                                                                                                                                                                                                                                                                                                                                                                                                                                                                                                                                                                                                                                                                                                                                                                                                                                    |
| <p>ZIKV-PRVABC59<br/><br/>Accession number:<br/>KX377337</p>                                                                                                                   | <p>MKNPKKKS GGFRI V NMLKRGVARVSPFGGLKRLPAGLLLGHGPIRMVLA I<br/>LAF LRF TAIKPSLGLINRWG SVGKKEAME I KKF KKD LAAMLRI INARKE<br/>KKRRGADTSVGI VGLLLTTAMAAEVTRRGSAYMYLDRNDAGEAISFP T T<br/>LGMNKCYIQIMDLGHMCDATMSYEC PMLDEGVEPDDVDCWCNTTSTWVVY<br/>GTCHHKKGEARRSRRAVTLPSHSTRKLQTRSQTWLESREYTKHLIRVENW<br/>IFRNPGFALAAAAIAWLLGSSTSQKVIYLVMI LLIAPAYSIRCIGVSNRD<br/>FVEGMSGGTWVDV VLEHGGCVTVMAQDKPTVDIELVTTTVSNMAEVRSYC<br/>YEASISDMASDSRCPTQGEAYLDKQSDTQYVCKRTLVDGRWGNGCGLFGK<br/>GSLVTCAKFACSKKMTGKSIQPENLEYRIMLSVHGSQHSGMIVNDTGHE T<br/>DENRAKVEITPNSPRAEATLGGFGSLGLDCEPRTGLDFSDLYLTMNNKH<br/>WLVHKEWFHDIPLPWAGADTGT PHWNNKEALVEFKDAHAKRQTVVVLGS<br/>QEGAVHTALAGALEAEMDGA KGR LSSGHLKCR LKMDKLR LKGVSYSLCTA<br/>AFTFTKI PAETLHGTVTVEVQYAGTDG PCKVPAQMAVDMQTLTPVGRLIT<br/>ANPVI TESTENSKMMLELDP PFGDSYIVI GVG EKKITHHWHRSGSTIGKA<br/>FEATVRGAKRMAVLGDTAWDFG SVGGALNSL GKG I HQIFGAAFKSLFGGM<br/>SWFSQILIGTLLMWLGLN TKNGSISLMCLALGGVLI FLSTAVSADVGC SV<br/>DFSKKETRCGTGVFVYNDVEAWRD RYKYHPDSPRRLAAA V KQAWEDGICG<br/>ISSVSRMENIMWRSVEGELNAI LEENG VQLTVVVG SVKNPM RGPQRLPV<br/>PVNELPHGWKAWGKSYFVRAAKT NNSFVVDGDTLKECPLKHRAWNSFLVE<br/>DHGFGVFHTSVWLKVRE DYSL ECDPAVIGTAVKGEAVHSDLYWIESEK<br/>NDTWRLKRAHLIEMKTCEWPKSHTLWTDGIEESDLIIPKSLAGPLSHHNT<br/>REGYRTQMKG PWHSEELEIRFE ECPGTKVHVEETCGTRGPSLRSTTASGR<br/>VIEEWCCRECTMPPLSFRAKDG CWY GMEIRPRKEPESNLVRSMTAGSTD<br/>HMDHFSLGVLVILLMVQEG LKKRMTTKI IISTSM AVL VAMI LGGFMSDL<br/>AKLAILMGATFAEMNTGGDVAHLALIAAFKVRPALLVSFIFRANWTPRES<br/>MLLALASCLLQTAISALEGDL MV LINGFALAWLAIRAMVVPRTDNITLAI<br/>LAALTPLARGTLLVAWRAGLATCGGFMLLSLKGKGSVKKNL PFMALGLT<br/>AVRLVDPINVVGLLLL TRSGKRSWPPSEVLTAVGLICALAGGFAKADIEM<br/>AGPMAAVGLLIVSYVVS GKSVD MYIERAGDITWEKDAEVTGNSPRLDVAL</p> |

|                                                              |                                                                                                                                                                                                                                                                                                                                                                                                                                                                                                                                                                                                                                                                                                                                                                                                                                                                                                                                                                                                                                                                                                                                                                                                                                                                                                                                                                                                                                                                                                                                                                                                                                                                                                                                                                                                                                                                                                                                                                                                                                                                                                                                                                                                                                                                                 |
|--------------------------------------------------------------|---------------------------------------------------------------------------------------------------------------------------------------------------------------------------------------------------------------------------------------------------------------------------------------------------------------------------------------------------------------------------------------------------------------------------------------------------------------------------------------------------------------------------------------------------------------------------------------------------------------------------------------------------------------------------------------------------------------------------------------------------------------------------------------------------------------------------------------------------------------------------------------------------------------------------------------------------------------------------------------------------------------------------------------------------------------------------------------------------------------------------------------------------------------------------------------------------------------------------------------------------------------------------------------------------------------------------------------------------------------------------------------------------------------------------------------------------------------------------------------------------------------------------------------------------------------------------------------------------------------------------------------------------------------------------------------------------------------------------------------------------------------------------------------------------------------------------------------------------------------------------------------------------------------------------------------------------------------------------------------------------------------------------------------------------------------------------------------------------------------------------------------------------------------------------------------------------------------------------------------------------------------------------------|
|                                                              | <p>DESGDFSLVEDDGPPMREIILKVVLMTICGMNPIAIPFAAGAWYVYVKTG<br/>KRS GALWDVPAPKEVKKGETTDGVYRVMTTRLLGSTQVGVGVMQEGVFHT<br/>MWHVTKGSALRSGEGRLLDPYWGDKQDLVSYCGPWKLDAAWDGHSEVQLL<br/>AVPPGERARNIQTLPGIFKTKDGDIGAVALDYAGTSGSPILLDKCGRVIG<br/>LYGNGVVIKNGSYVSAITQGRREEETPVCECFEPSMLKKKQLTVLDLHPGA<br/>GKTRRVLP EIVREAIKTRLRVTILAPTRVVAEMEEALRGLPVRMYMTTAV<br/>NVTHSGTEIVDLMCHATFTSRLLQPIRVPNYNLYIMDEAHFTDPSSIAAR<br/>GYISTRVEMGEAAAIFMTATPPGTRDAFPDSNSPIMDTEVEVPERAWSSG<br/>FDWVTDHSGKTWVFPVSVRNGNEIAACLTKAGKRVIQLSRKTFETEFQKT<br/>KHQEWDFVVTTDISEMGANFKADRVIDSRCLKPVILDGERVILAGPMPV<br/>THASAAQRRGRIGRNPKNPGDEYLYGGGCAETDEDHAHWLEARMLLDNIY<br/>LQDGLIASLYRPEADKVAIEGEFVKLRTEQRKTFVELMKRGDLVWMLAYQ<br/>VASAGITYTDRRWCFDGTNTNTIMEDSVPAEAVWRHGEKRVLPKRWMDAR<br/>VCSDHAALKSFKEFAAGKRGAAFGVMEALGTLPGHMTERFQEAIDNLAVL<br/>MRAETGSRPYKAAAAQLPETLETIMLLGLLGTVSLGIFVLMRNKGI GKM<br/>GFGMVTLGASAWLMWLSEIEPARIACVLI VVFLLLVLIPEPEKQ RSPQD<br/>NQMAIIMVAVGLLGLITANELGWLERTKSDLSHLMGRREEGATIGFSMD<br/>IDLRPASAWAIYAALTTFITPAVQHAVTTSYNNYSLMAMATQAGVLFMG<br/>KGMPPYAWDFGVPLLMIGCYSQLTPLTLIVAILLVVAHYMYLIPGLQAAA<br/>ARAAQKRTAAGIMKNPVVDGIVVTDIDTMTIDPQVEKKMGQVLLI AVAVS<br/>SAILSRTAWGWEAGALITAATSTLWEGSPNKYWNSSSTATSLCNI FRGSY<br/>LAGASLIYTVTRNAGLVKRRGGGTGETLGEKWKARLNQMSALEFY SYKKS<br/>GITTEVCREEARRALKDGVATGGHAVSRGSAKLRWLVERGYLQPYGKVIDL<br/>GCGRGGWSYYVATIRKVQEVKGYTKGGPGHEEPVVLVQSYGWNIVRLKSGV<br/>DVFHMAAEP CDTLLCDIGESSSSPEVEEARTLRVLSMVGDWLEKRP GAF C<br/>IKVLCPYTSTMMETLERLQRRYGGGLVRVPLSRNSTHEMYWVSGAKSNTI<br/>KSVSTTSQ LLLGRMDGPRRPVKYEEVDNLGSGTRAVVSCAEAPNMKIIGN<br/>RIERIRSEHAETWFFDENHPYRTWAYHGSYEAPTQGSASSLINGVVRLLS<br/>KPWDVVVTGVTGIAMTDTTPYGGQQRVFKEKVDTRVPDQEGTRQVMSMVSS<br/>WLWKELGKHKRPRVCTKEEFINKVRSNAALGAI FEEKEKWKTAVEAVNDP<br/>RFWALVDKEREHHLRGEQCQSCVYNMMGKREKKQGEFGKAKGSRAIWMWL<br/>GARFLEFEALGFLNEDHWMGRENSGGGVEGLGLQRLGYVLEEMSRIPGGR<br/>MYADDTAGWDTRI SRFDLENEALITNQMEKGHRALALAI IKYTYQNKVVK<br/>VLRPAEKGKTVMIDI SRQDQRGSGQVVTYALNTFTNLVVQLIRNMEAEV<br/>LEMQDLWLLRRSEKVTNWLQSNQWDR LKRMVSGDDCVVKPIDDRFAHAL<br/>RFLNDMGKVRKDTQEWK PSTGWDNWEV PFCSHHFNKLHLKDGRSIVVPC<br/>RHQDELIGRARVSPGAGWSIRETACLAKSYAQMWQLLYFHRRDLRLMANA<br/>ICSSVPVDWVPTGR TTWSIHGKGEWMTTEDMLVVWNRVWIEENDHMEDKT<br/>PVTKWTDIPYLGKREDLWCGSLIGHRPRTTWAENIKNTVNMVRRIGDEE<br/>KYMDYLS TQVRYLGEEGSTPGVL</p> |
| <p>ZIKV H/PF2013<br/><br/>Accession number:<br/>KJ776791</p> | <p>MKNPKKSGGFRI VNM LKRGVARVSPFGGLKRLPAGLLLGHPIRMVLA I<br/>LAF LRFTA IKPSLGLINRWG SVGKKEAMEIKKFKKDLAAMLRI INARKE<br/>KKRRGADTSVGI VGLLLTTAMAAEVTRRGSAYMYLDRNDAGEAISFPPT<br/>LGMNKC YIQIMDLGHMCDATMSYEC PMLDEGVEPDDVDCWCNTTSTWV VY<br/>GTCHHKKGEARRSRRAVTLPSHSTRKLQTRSQTWLESREYTKHLIRVENW<br/>IFRNPGFALAAAAIAWLLGSSTSQKVIYLVMI LLIAPAYSIRCIGVSNRD<br/>FVEGMSGGTWVDVVLEHGGCVTVMAQDKPTVDIELVTTTVSNMAEVRSYC<br/>YEASISDMASDSRCPTQGEAYLDKQSDTQYVCKRTLVD RGVNGCGLFGK<br/>GSLVTCAKFACSKKMTGKSIQPENLEYRIMLSVHSGHSQHSGMIVNDTGHE T<br/>DENRAKVEITPNSPRAEATLGGFGSLGLDCEPRTGLDFSDLYYLTMMNKH<br/>WL VHKEWFHDIPLPWHAGADTGT PHWNNKEALVEFKDAHAKRQTVVVLGS<br/>QEGAVHTALAGALEAEMDGAKGRLSSGHLKCR LKMDKLR LKGVSYSLCTA<br/>AFTFTKI PAETLHGTVTVEVQYAGTDG PCKVPAQMAVDMQTLTPVGR LIT<br/>ANPVITESTENSKMMLELDPPFGDSYIVIGVGEKKITHHWHRS GSTIGKA<br/>FEATVRGAKRMAVLGDTAWDFG SVGGALNSLGKGIHQIFGAAFKSLFGGM<br/>SWFSQILIGTLLMWLGLNTKNGSISLMCLALGGVLI FLSTAVSADVGC SV<br/>DFS KKETRCGTGVFVYNDVEAWRDRYKYHPDS PRRLAAAVKQAWEDGICG</p>                                                                                                                                                                                                                                                                                                                                                                                                                                                                                                                                                                                                                                                                                                                                                                                                                                                                                                                                                                                                                                                                                                                                                                                                                                                                               |

ISSVSRMENIMWRSVEGELNAILLEENGVQLTVVVGSVKNPMIRGPQRLPV  
PVNELPHGWKAWGKSYFVRAAKTNNFVVDGDTLKECPLKHRAWNSFLVE  
DHGFGVFHTSVWLKVREDSLECDPAVIGTAVKGEAVHSDLGWYIESEK  
NDTWRLKRAHLIEMKTCEWPKSHTLWTDGIEESDLIIPKSLAGPLSHHNT  
REGYRTQMKGFWHSEELERFEECPGTVKHVEETCGTRGPSLRSTTASGR  
VIEEWCCRECTMPPLSFRAKDGWCWYGMERPRKEPESNLVRSMTAGSTD  
HMDHFSLGLVILLMVQEGLLKRMFTTKIIISTSMAVLVAMILGGFMSDL  
AKLAILMGATFAEMNTGGDVAHLALIAAFKVRPALLVSFIFRANWTPRES  
MLLALASCLLQTAISALEGDLMLVINGFALAWLAIRAMVVPRTDNITLAI  
LAALTPLARGTLLVAVRAGLATCGGFMLLSLKGKGSVKNLFPVMAALGLT  
AVRLVDPINVVGLLLLTRSGKRSWPPSEVLTAVGLICALAGGFAKADIEM  
AGPMAAVGLLIVSYVVSJKSVDMYIERAGDITWEKDAEVTGANSPRLDVAL  
DESGDFSLVEDDGPMPREIILKVVLMITICGMNPIAIPFAAGAWYVYVKTG  
KRSGALWDVPAPEVKKGETTDGVYRVMTRRLLGSTQVGVGMQEGVFHT  
MWHVTKGSALRSSEGRDLDPYWGDKQDLVSYCGPWKLDAAWDGHSEVQLL  
AVPPGERARNIQTLPGIFKTKDGDIGAVALDYAGTSGSPIIDKCGRVIG  
LYGNGVVIKNGSYVSAITQGRREEETPVECFEFSMLKKKQLTVLDLHPGA  
GKTRRVLPDIVREAIKTRLRVILAPTRVVAEMEEALRGLPVRMYMTTAV  
NVTHSGTEIVDLMCHATFTSRLLQPIRVPNYNLYIMDEAHFTDPSSIAAR  
GYISTRVEMGEAAAIFMTATPPGTRDAFPDSNSPIMDTEVEVPERAWSSG  
FDWVTDHSGKTVWFVPSVRNGNEIAACLTKAGKRVIQLSRKTFFETEFQKT  
KHQEWDFVVTTDISEMGANFKADRVIDSRRLKPVILDGERVILAGPMPV  
THASAAQRRGRIGRNPKNKPGDEYLYGGCAETDEDHAHWLEARMLLDNIY  
LQDGLIASLYRPEADKVAIEGEFKLRTEQRKTFVELMKRGDLPVWLAYQ  
VASAGITYTDRRWCDFDGTNNNTIMEDSVPAEVWTRHGEKRVLKPWRMDAR  
VCSHAALKSFKEFAAGKRGAAFGVMEALGTLPGHMTERFQEAIDNLAVL  
MRAETGSRPYKAAAAQLPETLETIMLLGLLGTVSLGIFVLMRNKGIKGM  
GFGMVTLGASAWLMLWSEIEPARIACVLIVVFLLLVLIPEPEKQSRPQD  
NQMAIIMVAVGLLGLITANELGWLERTKSDLSHLMGRREEGATIGFSMD  
IDLRPASAWAIYAALTFITPAVQHAVTTSYNNYSLMAMYTQAGVLFMG  
KGMPPYAWDFGVPLLMGCYSQLTPLTLIVAILLVAHYMYLIPGLQAAA  
ARAAQKRTAAGIMKNPVVDGIVVTDIDTMTIDPQVEKKMGQVLLIYAVAVS  
SAILSRATAWGWGEAGALITAATSTLWEGSPNKYWNSSSTATSLCNIIFRGSY  
LAGASLIYTVTRNAGLVKRRGGGTGETLGEKWKARLNQMSALEFYSYKKS  
GITEVCREEARRALKDGVATGGHAVSRGSAKLRWLVERGYLQPYGKVIDL  
GCGRGGWSYRATIRKVQEVKGYTKGGPGHEEPMLVQSYGWNIVRLKSGV  
DVFHMAAEPDITLLCDIGESSSSPEVEEARTLRVLSMVGDWLEKRPAGFC  
IKVLCPYTSTMMETLERLQRRYGGGLVRVPLSRNSTHEMYWVSGAKSNTI  
KSVSTTSQLLLGRMDGPRRPVKYEEDVNLGSGTRAVVSCAEAPNMKIIGN  
RIERIRSEHAETWFFDENHPYRTWAYHGSYEAPTQGSASSLINGVVRLLS  
KPWDVVTGVTGIAMTDTTPYQQRVFKEKVDTRVPDQEGTRQVMSMVSS  
WLWKELGKHKRPRVCTKEEFINKVRSNAALGAIIEEEKEWKTAVEAVNDP  
RFWALVDKEREHHLRGECSQSCVYNNMKGREKKQGEFGKAKGSRAIYMWL  
GARFLEFEALGFLNEDHWMGRENSGGGVEGLGLQRLGYVLEEMSRIPGGR  
MYADDTAGWDTRISRFDLNEALITNQMEKGHRAALALAIKYTYQNKVVK  
VLRPAEKGKTVMIDIISRDQRGSGQVVTYALNTFTNLVVQLIRNMEAEV  
LEMQDLWLLRRSEKVTNWLQSNWDRLKRMVAVSGDDCVVKPIDDRFAHAL  
RFLNDMGKVRKDTQEWKPSGTGWDNWEVFPFCSHHFNKHLKLDGRSIVVPC  
RHQDELIGRARVSPGAGWSIRETACLAKSYAQMWQLLYFHRRDLRLMANA  
ICSSVPVDWVPTGRTTWSIHGKGEWMTTEDMLVVWNRVWIEENDHMDKT  
PVTKWTDIPYLGKREDLWCGSLIGHRPRTTWAENIKNTVMVRRIGDEE  
KYMDYLISTQVRYLGEESTPGVL

## Supplementary Table 2 | Antibody panel for Immunophenotyping.

| Cell Subset | Ab     | Clone     | Dye         | Company      | Cat. #      |
|-------------|--------|-----------|-------------|--------------|-------------|
| B / T cells | CD20   | 2H7       | PacificBlue | BioLegend    | 302328      |
|             | CD3    | 10D12     | PE-Vio770   | Miltenyi     | 130-104-202 |
|             | CD4    | M-T466    | PerCP       | Miltenyi     | 130-101-147 |
|             | CD8    | BW135/80  | VioGreen    | Miltenyi     | 130-096-902 |
|             | CD28   | 15E8      | APC-Vio770  | Miltenyi     | 130-104-278 |
|             | CD69   | FN50      | PE          | BD           | 557050      |
|             | CD95   | DX2       | APC         | Miltenyi     | 130-092-417 |
|             | Ki67   | B56       | Alexa 488   | BD           | 558616      |
| NK          | CD3    | 10D12     | APC         | Miltenyi     | 130-091-998 |
|             | CD16   | VEP13     | APC-Vio770  | Miltenyi     | 130-096-655 |
|             | CD56   | AF12-7H3  | PE          | Miltenyi     | 130-090-755 |
|             | CD14   | M5E2      | V500        | BD           | 561391      |
|             | CD8    | SK1       | BV421       | BioLegend    | 344748      |
|             | NKp30  | AF29-4D12 | PE-Vio770   | Miltenyi     | 130-104-116 |
|             | NKp46  | BAB281    | PC5         | Beck-Coulter | A66902      |
|             | NK2GA  | REA110    | FITC        | Miltenyi     | 130-098-818 |
| DC          | CD20   | 2H7       | FITC        | BD           | 555622      |
|             | CD3    | SP34      |             | BD           | 556611      |
|             | CD14   | M5E2      |             | BD           | 555397      |
|             | CD16   | 3G8       |             | BD           | 555406      |
|             | NKG2A  | REA110    |             | Miltenyi     | 130-098-818 |
|             | CD8    | SK1       |             | BioLegend    | 344704      |
|             | HLA DR | REA 805   | VioGreen    | Miltenyi     | 130-111-795 |
|             | CD123  | 7G3       | APC         | BD           | 560087      |
|             | CD11c  | 3.9       | PE/Cy7      | BioLegend    | 301608      |



### Supplementary Table 3 | Antibody panel for T cell functional response assessment.

| Marker        | Stain        | Clone  | Catalog Number | Vendor          | Dilution |
|---------------|--------------|--------|----------------|-----------------|----------|
| CD4           | PerCP-Cy-5.5 | SK3    | 566316         | BD Biosciences  | 1:25     |
| CD8 $\beta$   | PE           | ECD    | 6607123        | Beckman-Coulter | 1:20     |
| CD3           | Pacific Blue | SP34-2 | 558124         | BD Biosciences  | 1:30     |
| CD20          | BV605        | 2H7    | 563783         | BD Biosciences  | 1:30     |
| CD107a        | FITC         | H4A3   | 555800         | BD Biosciences  | 1:10     |
| CD28          | PE-Cy-5      | CD28.2 | 555730         | BD Biosciences  | 1:10     |
| CD95          | BV510        | DX2    | 305640         | Biolegend       | 1:30     |
| IFN- $\gamma$ | APC          | B27    | 554702         | BD Biosciences  | 1:30     |
| TNF- $\alpha$ | PE-Cy-7      | Mab11  | 557647         | BD Biosciences  | 1:30     |

## Supplementary Table 4 | Peptide sequences for stimulation of T cell functional response.

### Dengue Virus Type 2 Peptides

| Peptide | Amino Acid Sequence     | Peptide | Amino Acid Sequence  | Peptide | Amino Acid Sequence |
|---------|-------------------------|---------|----------------------|---------|---------------------|
| 1       | MRCIGISNRDFVEGV         | 29      | AWLVHRQWFLDPLPWL     | 57      | MRGAKRMAILGDTAWDF   |
| 2       | ISNRDFVEGVSGGSWVDI      | 30      | WFLDLPLPWLPGADTQGSNW | 58      | AILGDTAWDFGSLGGVF   |
| 3       | GVSGGSWVDIVLEHGSCV      | 31      | PGADTQGSNWIQKETLV    | 59      | WDFGSLGGVFTSIGKALH  |
| 4       | DIVLEHGSCVTTMAKNK       | 32      | SNWIQKETLVTFKNPHAK   | 60      | VFTSIGKALHQVFGAIY   |
| 5       | SCVTTMAKNKPTLDFELI      | 33      | LVTFKNPHAKKQDVVVL    | 61      | ALHQVFGAIYGAAFSGV   |
| 6       | NKPTLDFELIETEAKQPA      | 34      | HAKKQDVVVLGSQEGAMH   | 62      | AIYGAAFSGVSWIMKILI  |
| 7       | LIETEAKQPATLRKYCI       | 35      | VLGSQEGAMHTALTGA     | 63      | GVSWIMKILIGVIITWI   |
| 8       | KQPATLRKYCIEAKL         | 36      | GAMHTALTGATEIQM      | 64      | ILIGVIITWIGMNSR     |
| 9       | LRKYCIEAKLTNTTDSR       | 37      | ALTGATEIQMSSGNLLF    | 65      | IITWIGMNSRSTLSVSL   |
| 10      | KLNTTDSRCPTQGEPSL       | 38      | IQMSSGNLLFTGHLKCRL   | 66      | SRSTLSVSLVLVGVVTL   |
| 11      | RCPTQGEPSLNEEQDKRF      | 39      | LFTGHLKCRLRMDKLQLK   | 67      | SLVLVGVVTLVGLVMVQA  |
| 12      | SLNEEQDKRFVCKHSMV       | 40      | RLRMDKLQLKGMSYSM     |         |                     |
| 13      | KRFVCKHSMVDRGWNGCG<br>L | 41      | LQLKGMSYSMCTGKFKVV   |         |                     |
| 14      | DRGWNGCGLFGKGGIV        | 42      | SMCTGKFKVVKEIAETQH   |         |                     |
| 15      | CGLFGKGGIVTCAMFTCK      | 43      | VVKEIAETQHGTIVIRV    |         |                     |
| 16      | IVTCAMFTCKKNMKGVV       | 44      | TQHGTIVIRVQYEGDGSPCK |         |                     |
| 17      | CKKNMKGVVQPENLEY        | 45      | VQYEGDGSPCKIPFEIM    |         |                     |
| 18      | KVVQPENLEYTIVITPH       | 46      | SPCKIPFEIMDLEKRHVL   |         |                     |
| 19      | LEYTIVITPHSGEEHAV       | 47      | IMDLEKRHVLRGLITV     |         |                     |
| 20      | TPHSGEEHAVGNDTGKH       | 48      | RHVLRGLITVNPVITEK    |         |                     |
| 21      | HAVGNDTGKHGKEIKI        | 49      | ITVNPVITEKDSPVNIEA   |         |                     |
| 22      | TGKHGKEIKITPQSSI        | 50      | EKDSPVNIEAEPFGDSY    |         |                     |
| 23      | EIKITPQSSITEAELTGY      | 51      | EAEPFGDSYIIIGV       |         |                     |
| 24      | SITEAELTGYGTVM          | 52      | FGDSYIIIGVEPGQLKL    |         |                     |
| 25      | ELTGYGTVMESPRGTGL       | 53      | IGVEPGQLKLNWFKK      |         |                     |
| 26      | TMECSPRTGLDFNEMVLL      | 54      | GQLKLNWFKKGSIGQMI    |         |                     |
| 27      | GLDFNEMVLLQMENKAWL      | 55      | KKGSIGQMIETTMRGAK    |         |                     |
| 28      | LLQMENKAWLVHRQWFL       | 56      | MIETTMRGAKRMAIL      |         |                     |

## Supplementary Table 4 | Continuation

### Zika Virus Envelope Peptides

| Peptide | Amino Acid Sequence | Peptide | Amino Acid Sequence | Peptide | Amino Acid Sequence |
|---------|---------------------|---------|---------------------|---------|---------------------|
| ZIKV59  | IRCIGVSNRDFVEGM     | ZIKV87  | LSVHGSQHSQMIVND     | ZIKV115 | KGRLSSGHLKCRCLKM    |
| ZIKV60  | VSNRDFVEGMSGGTW     | ZIKV88  | SQHSGMIVNDTGHET     | ZIKV116 | SGHLKCRCLKMDKLRL    |
| ZIKV61  | FVEGMSGGTWVDVVL     | ZIKV89  | MIVNDTGHETDENRA     | ZIKV117 | CRLKMDKLRLKGVSY     |
| ZIKV62  | SGGTWVDVLEHGGC      | ZIKV90  | TGHETDENRAKVEIT     | ZIKV118 | DKLRLKGVSYSLCTA     |
| ZIKV63  | VDVLEHGGCVTVMA      | ZIKV91  | DENRAKVEITPNSPR     | ZIKV119 | KGVSYSLCTAAFTFT     |
| ZIKV64  | EHGGCVTVMAQDKPT     | ZIKV92  | KVEITPNSPRAEATL     | ZIKV120 | SLCTAAFTFTKIPAE     |
| ZIKV65  | VTVMAQDKPTVDIEL     | ZIKV93  | PNSPRAEATLGGFGS     | ZIKV121 | AFTFTKIPAEHLGT      |
| ZIKV66  | QDKPTVDIELVTTTV     | ZIKV94  | AEATLGGFGSLGLDC     | ZIKV122 | KIPAEHLGTVTVEV      |
| ZIKV67  | VDIELVTTTVSNMAE     | ZIKV95  | GGFGSLGLDCEPRTG     | ZIKV123 | TLHGTVTVEVQYAGT     |
| ZIKV68  | VTTTVSNMAEVRSYC     | ZIKV96  | LGLDCEPRTGLDFSD     | ZIKV124 | VTVEVQYAGTDGPCK     |
| ZIKV69  | SNMAEVRSYCYEASI     | ZIKV97  | EPRTGLDFSDLYYLT     | ZIKV125 | QYAGTDGPCKVPAQM     |
| ZIKV70  | VRSYCYEASISDMAS     | ZIKV98  | LDFSDLYYLTMNKH      | ZIKV126 | DGPCKVPAQMAVDMQ     |
| ZIKV71  | YEASISDMASDRCP      | ZIKV99  | LYYLTMNKHVHLVHK     | ZIKV127 | VPAQMAVDMQTLTPV     |
| ZIKV72  | SDMASDRCPQTQGEA     | ZIKV100 | MNNKHVHLVHKEWFHD    | ZIKV128 | AVDMQTLTPVGRILT     |
| ZIKV73  | DSRCPTQGEAYLDKQ     | ZIKV101 | WLVHKEWFHDIPLPW     | ZIKV129 | TLTPVGRILTANPVI     |
| ZIKV74  | TQGEAYLDKQSDTQY     | ZIKV102 | EFWFHDIPLPWAGAD     | ZIKV130 | GRLITANPVITESTE     |
| ZIKV75  | YLDKQSDTQYVCKRT     | ZIKV103 | IPLPWAGADTGTPH      | ZIKV131 | ANPVITESTENSKMM     |
| ZIKV76  | SDTQYVCKRTLVDGR     | ZIKV104 | HAGADTGTPHWNNKE     | ZIKV132 | TESTENSKMMLELDP     |
| ZIKV77  | VCKRTLVDGRWGNGC     | ZIKV105 | TGTPHWNNKEALVEF     | ZIKV133 | NSKMMLELDPPFGDS     |
| ZIKV78  | LVDRGWGNGCGLFGK     | ZIKV106 | WNNKEALVEFKDAHA     | ZIKV134 | LELDPPFGDSYIVIG     |
| ZIKV79  | WGNGCGLFGKGLSVT     | ZIKV107 | ALVEFKDAHAKRQTV     | ZIKV135 | PFGDSYIVIGVGEKK     |
| ZIKV80  | GLFGKGLSVTCAKFA     | ZIKV108 | KDAHAKRQTVVVLGS     | ZIKV136 | YIVIGVGEKKITHHW     |
| ZIKV81  | GSLVTCAKFACSKKM     | ZIKV109 | KRQTVVVLGSQEGAV     | ZIKV137 | VGEKKITHHWHRSGS     |
| ZIKV82  | CAKFACSKKMTGKSI     | ZIKV110 | VVLGSQEGAVHTALA     | ZIKV138 | ITHHWHRSGSTIGKA     |
| ZIKV83  | CSKKMTGKSIQPENL     | ZIKV111 | QEGAVHTALAGALEA     | ZIKV139 | HRSGSTIGKAFEATV     |
| ZIKV84  | TGKSIQPENLEYRIM     | ZIKV112 | HTALAGALEAEMDGA     | ZIKV140 | TIGKAFEATVRGAKR     |
| ZIKV85  | QPENLEYRIMLSVHG     | ZIKV113 | GALEAEMDGAKGRSL     | ZIKV141 | FEATVRGAKRMAVLG     |
| ZIKV86  | EYRIMLSVHGSQHSG     | ZIKV114 | EMDGAKGRSLSSGHLK    | ZIKV142 | RGAKRMAVLGDTAWD     |

## Supplementary Table 4 | Continuation

| Peptide | Amino Acid Sequence |
|---------|---------------------|
| ZIKV143 | MAVLGDTAWDFGSVG     |
| ZIKV144 | DTAWDFGSVG GALNS    |
| ZIKV145 | FGSVGGALNSLGKGI     |
| ZIKV146 | GALNSLGKGIHQIFG     |
| ZIKV147 | LGKGIHQIFGAAFKS     |
| ZIKV148 | HQIFGAAFKSLFGGM     |
| ZIKV149 | AAFKSLFGGMSWFSQ     |
| ZIKV150 | LFGGMSWFSQILIGT     |
| ZIKV151 | SWFSQILIGTLLMWL     |
| ZIKV152 | ILIGTLLMWLGLNTK     |
| ZIKV153 | LLMWLGLNTKNGSIS     |
| ZIKV154 | GLNTKNGSISLMCLA     |
| ZIKV155 | NGSISLMCLALGGVL     |
| ZIKV156 | LMCLALGGVLIFLST     |
| ZIKV157 | LGGVLIFLSTAVSAD     |
| ZIKV158 | IFLSTAVSADVGCSV     |
| ZIKV159 | AVSADVGCSVDFSKK     |

## Supplementary Table 4 | Continuation

### Zika Virus Non-Structural Peptides

| Peptide | Amino Acid Sequence | Peptide | Amino Acid Sequence | Peptide | Amino Acid Sequence |
|---------|---------------------|---------|---------------------|---------|---------------------|
| ZIKV160 | VGCSVDFSKKETRCG     | ZIKV188 | ECPLKHRAWSFLVE      | ZIKV216 | GTKVHVEETCGTRGP     |
| ZIKV161 | DFSKKETRCGTGVFV     | ZIKV189 | HRAWSFLVEDHGFG      | ZIKV217 | VEETCGTRGPSLRST     |
| ZIKV162 | ETRCGTGVFVYNDVE     | ZIKV190 | SFLVEDHGFGVFHTS     | ZIKV218 | GTRGPSLRSTTASGR     |
| ZIKV163 | TGVFVYNDVEAWRDR     | ZIKV191 | DHGFGVFHTSVWLKV     | ZIKV219 | SLRSTTASGRVIEEW     |
| ZIKV164 | YNDVEAWRDRYKYHP     | ZIKV192 | VFHTSVWLKVREDYS     | ZIKV220 | TASGRVIEEWCCREC     |
| ZIKV165 | AWRDRYKYHPDSPRR     | ZIKV193 | VWLKVREDYSLECDP     | ZIKV221 | VIEEWCCRECTMPPL     |
| ZIKV166 | YKYHPDSPRRLAAAV     | ZIKV194 | REDYSLECDPAVIGT     | ZIKV222 | CCRECTMPPLSFRAK     |
| ZIKV167 | DSPRRLAAAVKQAWE     | ZIKV195 | LECDPAVIGTAVKGGK    | ZIKV223 | TMPPLSFRAKDGCWY     |
| ZIKV168 | LAAAVKQAWEDGICG     | ZIKV196 | AVIGTAVKGGKEAVHS    | ZIKV224 | SFRAKDGCWYGMEIR     |
| ZIKV169 | KQAWEDGICGISSVS     | ZIKV197 | AVKGGKEAVHSDLGYW    | ZIKV225 | DGCWYGMEIRPRKEP     |
| ZIKV170 | DGICGISSVSRMENI     | ZIKV198 | EAVHSDLGYWIESEK     | ZIKV226 | GMEIRPRKEPESNLV     |
| ZIKV171 | ISSVSRMENIMWRSV     | ZIKV199 | DLGYWIESEKNDTWR     | ZIKV227 | PRKEPESNLVRSMT      |
| ZIKV172 | RMENIMWRSVEGELN     | ZIKV200 | IESEKNDTWRLKRAH     | ZIKV228 | ESNLVRSMTAGSTD      |
| ZIKV173 | MWRSVEGELNAILEE     | ZIKV201 | NDTWRLKRAHLIEMK     | ZIKV229 | RSMVTAGSTDHMDHF     |
| ZIKV174 | EGELNAILEENGVQL     | ZIKV202 | LKRAHLIEMKTCEWP     | ZIKV230 | AGSTDHMDHFSLGVL     |
| ZIKV175 | AILEENGVQLTVVVG     | ZIKV203 | LIEMKTCEWPKSHTL     | ZIKV231 | HMDHFSLGVLVILLM     |
| ZIKV176 | NGVQLTVVVGSVKNP     | ZIKV204 | TCEWPKSHTLWTDGI     | ZIKV232 | SLGVLVILLMVQEGL     |
| ZIKV177 | TVVVGSVKNPMWRGP     | ZIKV205 | KSHTLWTDGIEESDL     | ZIKV233 | VILLMVQEGLKKRMT     |
| ZIKV178 | SVKNPMWRGPQRLPV     | ZIKV206 | WTDGIEESDLIIPKS     | ZIKV234 | VQEGLKKRMTTKIII     |
| ZIKV179 | MWRGPQRLPVPVNEL     | ZIKV207 | EESDLIIPKSLAGPL     | ZIKV235 | KKRMTTKIIISTMA      |
| ZIKV180 | QRLPVPVNELPHGWK     | ZIKV208 | IIPKSLAGPLSHHNT     | ZIKV236 | TKIIISTMAVLVAM      |
| ZIKV181 | PVNELPHGWKAWGKS     | ZIKV209 | LAGPLSHHNTREGYR     | ZIKV237 | STSMAVLVAMILGGF     |
| ZIKV182 | PHGWKAWGKSYFVRA     | ZIKV210 | SHHNTREGYRTQMKG     | ZIKV238 | VLVAMILGGFMSSDL     |
| ZIKV183 | AWGKSYFVRAAKTNN     | ZIKV211 | REGYRTQMKGPPHSE     | ZIKV239 | ILGGFMSDLAKLAI      |
| ZIKV184 | YFVRAAKTNNFVVD      | ZIKV212 | TQMKGPPHSEELEIR     | ZIKV240 | SMSDLAKLAILMGAT     |
| ZIKV185 | AKTNNFVVDGDTLK      | ZIKV213 | PPHSEELEIRFECEP     | ZIKV241 | AKLAILMGATFAEMN     |
| ZIKV186 | SFVVDGDTLKECPLK     | ZIKV214 | ELEIRFECEPGTKVH     | ZIKV242 | LMGATFAEMNTGGDV     |
| ZIKV187 | GDTLKECPLKHRAWN     | ZIKV215 | FECEPGTKVHVEETC     | ZIKV243 | FAEMNTGGDVAHLAL     |

| Peptide | Amino Acid Sequence | Peptide | Amino Acid Sequence | Peptide | Amino Acid Sequence |
|---------|---------------------|---------|---------------------|---------|---------------------|
| ZIKV244 | TGGDVAHLALIAAFK     | ZIKV272 | DPINVVGLLLLTRSG     | ZIKV300 | YVKTGKRSGALWDVP     |
| ZIKV245 | AHLALIAAFKVRPAL     | ZIKV273 | VGLLLLTRSGKRSWP     | ZIKV301 | KRSGALWDVPAPKEV     |
| ZIKV246 | IAAFKVRPALLVSFI     | ZIKV274 | LTRSGKRSWPPSEVL     | ZIKV302 | LWDVPAPKEVKKGET     |
| ZIKV247 | VRPALLVSFIFRANW     | ZIKV275 | KRSWPPSEVLTAVGL     | ZIKV303 | APKEVKKGETTDGVY     |
| ZIKV248 | LVSFIFRANWTPRES     | ZIKV276 | PSEVLTAVGLICALA     | ZIKV304 | KKGETTDGVYRVMTR     |
| ZIKV249 | FRANWTPRESMLLAL     | ZIKV277 | TAVGLICALAGGFAK     | ZIKV305 | TDGVYRVMTRRLLGS     |
| ZIKV250 | TPRESMLLALASCLL     | ZIKV278 | ICALAGGFAKADIEM     | ZIKV306 | RVMTRRLLGSTQGVV     |
| ZIKV251 | MLLALASCLLQTAIS     | ZIKV279 | GGFAKADIEMAGPMA     | ZIKV307 | RLLGSTQVGVGVMQE     |
| ZIKV252 | ASCLLQTAISALEGD     | ZIKV280 | ADIEMAGPMAAVGLL     | ZIKV308 | TQVGVGVMQEGVFHT     |
| ZIKV253 | QTAISALEGDLMVLI     | ZIKV281 | AGPMAAVGLLIVSYV     | ZIKV309 | GVMQEGVFHTMWHVT     |
| ZIKV254 | ALEGDLMLINGFAL      | ZIKV282 | AVGLLIVSYVVSQKS     | ZIKV310 | GVFHTMWHVTKGSAL     |
| ZIKV255 | LMVLINGFALAWLAI     | ZIKV283 | IVSYVVSQKSVDMYI     | ZIKV311 | MWHVTKGSALRSSEG     |
| ZIKV256 | NGFALAWLAIRAMVV     | ZIKV284 | VSQKSVDMYIERAGD     | ZIKV312 | KGSALRSSEGRLDPY     |
| ZIKV257 | AWLAIRAMVVPRTDN     | ZIKV285 | VDMYIERAGDITWEK     | ZIKV313 | RSSEGRLDPYWGDKV     |
| ZIKV258 | RAMVVPRTDNITLAI     | ZIKV286 | ERAGDITWEKDAEVT     | ZIKV314 | RLDPYWGDKVQDLVS     |
| ZIKV259 | PRTDNITLAILAALT     | ZIKV287 | ITWEKDAEVTGNSPR     | ZIKV315 | WGDVQDLVSYCGPW      |
| ZIKV260 | ITLAILAALTPLARG     | ZIKV288 | DAEVTGNSPRLDVAL     | ZIKV316 | QDLVSYCGPWKLDAA     |
| ZIKV261 | LAALTPLARGTLLVA     | ZIKV289 | GNSPRLDVALDESGD     | ZIKV317 | YCGPWKLDAAWDGHS     |
| ZIKV262 | PLARGTLLVAWRAGL     | ZIKV290 | LDVALDESGDFSLVE     | ZIKV318 | KLDAAWDGHSEVQLL     |
| ZIKV263 | TLLVAWRAGLATCGG     | ZIKV291 | DESGDFSLVEDDGPP     | ZIKV319 | WDGHSEVQLLAVPPG     |
| ZIKV264 | WRAGLATCGGFMLLS     | ZIKV292 | FSLVEDDGPPMREII     | ZIKV320 | EVQLLAVPPGERARN     |
| ZIKV265 | ATCGGFMLLSLKGKG     | ZIKV293 | DDGPPMREIILKVVL     | ZIKV321 | AVPPGERARNIQTLP     |
| ZIKV266 | FMLLSLKGKGSVKKN     | ZIKV294 | MREIILKVVLMTICG     | ZIKV322 | ERARNIQTLPGIFKT     |
| ZIKV267 | LKGKGSVKKNLPPFVM    | ZIKV295 | LKVVLMTICGMNPIA     | ZIKV323 | IQTLPGIFKTKDGD      |
| ZIKV268 | SVKKNLPPFVMALGLT    | ZIKV296 | MTICGMNPIAIPFAA     | ZIKV324 | GIFKTKDGDIGAVAL     |
| ZIKV269 | LPFVMALGLTAVRLV     | ZIKV297 | MNPIAIPFAAGAWYV     | ZIKV325 | KDGDIGAVALDYPAG     |
| ZIKV270 | ALGLTAVRLVDPINV     | ZIKV298 | IPFAAGAWYVYVKTG     | ZIKV326 | GAVALDYPAGTSGSP     |
| ZIKV271 | AVRLVDPINVVGLLL     | ZIKV299 | GAWYVYVKTGKRSGA     | ZIKV327 | DYPAGTSGSPILDKC     |

| Peptide | Amino Acid Sequence | Peptide | Amino Acid Sequence | Peptide | Amino Acid Sequence |
|---------|---------------------|---------|---------------------|---------|---------------------|
| ZIKV328 | TSGSPILDKCGRVIG     | ZIKV356 | IRVPNYNLYIMDEAH     | ZIKV384 | MGANFKADRVIDSRR     |
| ZIKV329 | ILDKCGRVIGLYGNG     | ZIKV357 | YNLYIMDEAHFTDPS     | ZIKV385 | KADRVIDSRRCLKPV     |
| ZIKV330 | GRVIGLYGNGVVIKN     | ZIKV358 | MDEAHFTDPSSIAAR     | ZIKV386 | IDSRRCLKPVILDGE     |
| ZIKV331 | LYGNGVVIKNGSYVS     | ZIKV359 | FTDPSSIAARGYIST     | ZIKV387 | CLKPVILDGERVILA     |
| ZIKV332 | VVIKNGSYVSAITQG     | ZIKV360 | SIAARGYISTRVEMG     | ZIKV388 | ILDGERVILAGPMPV     |
| ZIKV333 | GSYVSAITQGRREEE     | ZIKV361 | GYISTRVEMGEAAAI     | ZIKV389 | RVILAGPMPVTHASA     |
| ZIKV334 | AITQGRREEETPVEC     | ZIKV362 | RVEMGEAAAFMTAT      | ZIKV390 | GPMPVTHASAAQRRG     |
| ZIKV335 | RREEETPVECFEPSM     | ZIKV363 | EAAAFMTATPPGTR      | ZIKV391 | THASAAQRRGRIGRN     |
| ZIKV336 | TPVECFEPSMLKKKQ     | ZIKV364 | FMTATPPGTRDAFPD     | ZIKV392 | AQRRGRIGRNPNKPG     |
| ZIKV337 | FEPSMLKKKQLTVLD     | ZIKV365 | PPGTRDAFPDSNSPI     | ZIKV393 | RIGRNPNKPGDEYLY     |
| ZIKV338 | LKKKQLTVLDLHPGA     | ZIKV366 | DAFPDSNSPIMDTEV     | ZIKV394 | PNKPGDEYLYGGGCA     |
| ZIKV339 | LTVLDLHPGAGKTRR     | ZIKV367 | SNSPIMDTEVEVPER     | ZIKV395 | DEYLYGGGCAETDED     |
| ZIKV340 | LHPGAGKTRRVLPEI     | ZIKV368 | MDTEVEVPERAWSSG     | ZIKV396 | GGGCAETDEDHAHWL     |
| ZIKV341 | GKTRRVLPEIVREAI     | ZIKV369 | EVPERAWSSGFDWVT     | ZIKV397 | ETDEDHAHWLEARMML    |
| ZIKV342 | VLPEIVREAIKTRLR     | ZIKV370 | AWSSGFDWVTDHSGK     | ZIKV398 | HAHWLEARMMLDNIY     |
| ZIKV343 | VREAIKTRLRTVILA     | ZIKV371 | FDWVTDHSGKTWVVF     | ZIKV399 | EARMMLDNIYLQDGL     |
| ZIKV344 | KTRLRTVILAPTRVV     | ZIKV372 | DHSGKTWVVFVPSVRN    | ZIKV400 | LDNIYLQDGLIASLY     |
| ZIKV345 | TVILAPTRVVAEEME     | ZIKV373 | TWVVFVPSVRNGNEIA    | ZIKV401 | LQDGLIASLYRPEAD     |
| ZIKV346 | PTRVVAEEMEEALRG     | ZIKV374 | PSVRNGNEIAACLK      | ZIKV402 | IASLYRPEADKVAAI     |
| ZIKV347 | AAEMEEALRGLPVRY     | ZIKV375 | GNEIAACLKAGKRV      | ZIKV403 | RPEADKVAIEGEFK      |
| ZIKV348 | EALRGLPVRYMTTAV     | ZIKV376 | ACLTKAGKRVQLSR      | ZIKV404 | KVAAIEGEFKLRTEQ     |
| ZIKV349 | LPVRYMTTAVNVTHS     | ZIKV377 | AGKRVQLSRKTFET      | ZIKV405 | EGEFKLRTEQRKTFV     |
| ZIKV350 | MTTAVNVTHSGTEIV     | ZIKV378 | IQLSRKTFETEFQKT     | ZIKV406 | LRTEQRKTFVELMKR     |
| ZIKV351 | NVTHSGTEIVDLMCH     | ZIKV379 | KTFETEFQKTKHQEW     | ZIKV407 | RKTFVELMKRGDLPV     |
| ZIKV352 | GTEIVDLMCHATFTS     | ZIKV380 | EFQKTKHQEWDFVVT     | ZIKV408 | ELMKRGDLPVWLAYQ     |
| ZIKV353 | DLMCHATFTSRLLQP     | ZIKV381 | KHQEWDFVVTDDISE     | ZIKV409 | GDLPVWLAYQVASAG     |
| ZIKV354 | ATFTSRLLQPIRVPN     | ZIKV382 | DFVVTDDISEMGANF     | ZIKV410 | WLAYQVASAGITYTD     |
| ZIKV355 | RLLQPIRVPNYNLYI     | ZIKV383 | TDISEMGANFKADRV     | ZIKV411 | VASAGITYTDRRWCF     |

| Peptide | Amino Acid Sequence | Peptide | Amino Acid Sequence | Peptide | Amino Acid Sequence |
|---------|---------------------|---------|---------------------|---------|---------------------|
| ZIKV412 | ITYTDRRWCFDGTNN     | ZIKV440 | GIGKMGFGMVTLGAS     | ZIKV468 | LMAMATQAGVLFMG      |
| ZIKV413 | RRWCFDGTNNNTIME     | ZIKV441 | GFGMVTLGASAWLMW     | ZIKV469 | TQAGVLFMGKGMPPF     |
| ZIKV414 | DGTNNTIMEDSVPA      | ZIKV442 | TLGASAWLMWLSEIE     | ZIKV470 | LFGMGKGMPPYAWDF     |
| ZIKV415 | NTIMEDSVPAEVWTR     | ZIKV443 | AWLMWLSEIEPARIA     | ZIKV471 | KGMPFYAWDFGVPLL     |
| ZIKV416 | DSVPAEVWTRHGEKR     | ZIKV444 | LSEIEPARIACVLIV     | ZIKV472 | YAWDFGVPLLIGCY      |
| ZIKV417 | EVWTRHGEKRVLKPR     | ZIKV445 | PARIACVLIVVFLLL     | ZIKV473 | GVPLLIGCYSQLTP      |
| ZIKV418 | HGEKRVLKPRWMDAR     | ZIKV446 | CVLIVVFLLLVVLIP     | ZIKV474 | MIGCYSQLTPLTLIV     |
| ZIKV419 | VLKPRWMDARVCSDH     | ZIKV447 | VFLLLVVLIPPEKQ      | ZIKV475 | SQLTPLTLIVAILL      |
| ZIKV420 | WMDARVCSHAALKS      | ZIKV448 | VVLIPPEKQRSPQD      | ZIKV476 | LTLIVAILLVAHYM      |
| ZIKV421 | VCSHAALKSFKEFA      | ZIKV449 | EPEKQRSPQDNQMAI     | ZIKV477 | AILLVAHYMYLIPG      |
| ZIKV422 | AALKSFKEFAAGKRG     | ZIKV450 | RSPQDNQMAIIMVA      | ZIKV478 | VAHYMYLIPGLQAAA     |
| ZIKV423 | FKEFAAGKRGAAFGV     | ZIKV451 | NQMAIIMVAVGLLG      | ZIKV479 | YLIPGLQAAAAARAAQ    |
| ZIKV424 | AGKRGAAFGVMEALG     | ZIKV452 | IIMVAVGLLGLITAN     | ZIKV480 | LQAAAAARAAQKRTAA    |
| ZIKV425 | AAFGVMEALGTLPGH     | ZIKV453 | VGLLGLITANELGWL     | ZIKV481 | ARAAQKRTAAGIMKN     |
| ZIKV426 | MEALGTLPGHMTERF     | ZIKV454 | LITANELGWLERTKS     | ZIKV482 | KRTAAGIMKNPVVDG     |
| ZIKV427 | TLPGHMTERFQEAI      | ZIKV455 | ELGWLERTKSDLSHL     | ZIKV483 | GIMKNPVVDGIVVTD     |
| ZIKV428 | MTERFQEAIIDLAVL     | ZIKV456 | ERTKSDLSHLMGRRE     | ZIKV484 | PVVDGIVVTDIDTMT     |
| ZIKV429 | QEAIIDLAVLMRAET     | ZIKV457 | DLSHLMGRREEGATI     | ZIKV485 | IVVTDIDTMTIDPQV     |
| ZIKV430 | NLAVLMRAETGSRPY     | ZIKV458 | MGRREEGATIGFSMD     | ZIKV486 | IDTMTIDPQVEKKMG     |
| ZIKV431 | MRAETGSRPYKAAAA     | ZIKV459 | EGATIGFSMDIDLRP     | ZIKV487 | IDPQVEKKMGQVLLI     |
| ZIKV432 | GSRPYKAAAAQLPET     | ZIKV460 | GFSMDIDLRPASAWA     | ZIKV488 | EKKMGQVLLIAVAVS     |
| ZIKV433 | KAAAAQLPETLETIM     | ZIKV461 | IDLRPASAWAIYAAL     | ZIKV489 | QVLLIAVAVSSAILS     |
| ZIKV434 | QLPETLETIMLLGLL     | ZIKV462 | ASAWAIYAALTTFIT     | ZIKV490 | AVAVSSAILSRTAWG     |
| ZIKV435 | LETIMLLGLLGTVSL     | ZIKV463 | IYAALTTFITPAVQH     | ZIKV491 | SAILSRTAWGWGEAG     |
| ZIKV436 | LLGLLGTVSLGIFFV     | ZIKV464 | TTFITPAVQHAVTTS     | ZIKV492 | RTAWGWGEAGALITA     |
| ZIKV437 | GTVSLGIFFVLMRNK     | ZIKV465 | PAVQHAVTTSYNNYS     | ZIKV493 | WGEAGALITAATSTL     |
| ZIKV438 | GIFFVLMRNKGIGKM     | ZIKV466 | AVTTSYNNYSLMAMA     | ZIKV494 | ALITAATSTLWEGSP     |
| ZIKV439 | LMRNKGIGKMGFGMV     | ZIKV467 | YNNYSLMAMATQAGV     | ZIKV495 | ATSTLWEGSPNKYWN     |



| Peptide | Amino Acid Sequence | Peptide | Amino Acid Sequence | Peptide | Amino Acid Sequence |
|---------|---------------------|---------|---------------------|---------|---------------------|
| ZIKV496 | WEGSPNKYWNSSTAT     | ZIKV524 | KVQEVKGYTKGGPGH     | ZIKV552 | TSQLLLGRMDGPRRP     |
| ZIKV497 | NKYWNSSTATSLCNI     | ZIKV525 | KGYTKGGPGHEEPVL     | ZIKV553 | LGRMDGPRRPVKYEE     |
| ZIKV498 | SSTATSLCNIFRGSY     | ZIKV526 | GGPGHEEPVLVQSYG     | ZIKV554 | GPRRPVKYEEDVNLG     |
| ZIKV499 | SLCNIFRGSYLAGAS     | ZIKV527 | EPPVLVQSYGWNIVR     | ZIKV555 | VKYEEDVNLGSGTRA     |
| ZIKV500 | FRGSYLAGASLIYTV     | ZIKV528 | VQSYGWNIVRLKSGV     | ZIKV556 | DVNLGSGTRAVVSCA     |
| ZIKV501 | LAGASLIYTVTRNAG     | ZIKV529 | WNIVRLKSGVDVFHM     | ZIKV557 | SGTRAVVSCAEAPNM     |
| ZIKV502 | LIYTVTRNAGLVKRR     | ZIKV530 | LKSGVDVFMMAEPC      | ZIKV558 | VVSCAEAPNMKIIGN     |
| ZIKV503 | TRNAGLVKRRGGGTG     | ZIKV531 | DVFMMAEPCDTLLC      | ZIKV559 | EAPNMKIIGNRIERI     |
| ZIKV504 | LVKRRGGGTGETLGE     | ZIKV532 | AAEPCDTLLCDIGES     | ZIKV560 | KIIGNRIERIRSEHA     |
| ZIKV505 | GGGTGETLGEKWKAR     | ZIKV533 | DTLLCDIGESSSSPE     | ZIKV561 | RIERIRSEHAETWFF     |
| ZIKV506 | ETLGEKWKARLNQMS     | ZIKV534 | DIGESSSSPEVEEAR     | ZIKV562 | RSEHAETWFFDENHP     |
| ZIKV507 | KWKARLNQMSALEFY     | ZIKV535 | SSSPEVEEARLRLV      | ZIKV563 | ETWFFDENHPYRTWA     |
| ZIKV508 | LNQMSALEFYSYKKS     | ZIKV536 | VEEARLRLVLSMVG      | ZIKV564 | DENHPYRTWAYHGSY     |
| ZIKV509 | ALEFYSYKKS GITEV    | ZIKV537 | TLRLVLSMVGDWLEKR    | ZIKV565 | YRTWAYHGSYEAPTQ     |
| ZIKV510 | SYKKS GITEVCREEA    | ZIKV538 | SMVGDWLEKRPGAFC     | ZIKV566 | YHGSYEAPTQGSASS     |
| ZIKV511 | GITEVCREEARALK      | ZIKV539 | WLEKRPGAFKICVLC     | ZIKV567 | EAPTQGSASSLINGV     |
| ZIKV512 | CREEARALKDGVAT      | ZIKV540 | PGAFKICVLCPYTST     | ZIKV568 | GSASSLINGVVRLLS     |
| ZIKV513 | RRALKDGVATGGHAV     | ZIKV541 | IKVLCPYTSTMETL      | ZIKV569 | LINGVVRLLSKPWDV     |
| ZIKV514 | DGVATGGHAVSRGSA     | ZIKV542 | PYTSTMETLERLQR      | ZIKV570 | VRLLSKPWDVVTGVT     |
| ZIKV515 | GGHAVSRGSAKLRWL     | ZIKV543 | MMETLERLQRRYGGG     | ZIKV571 | KPWDVVTGVTGIAMT     |
| ZIKV516 | SRGSAKLRWLVERGY     | ZIKV544 | ERLQRRYGGGLVRVP     | ZIKV572 | VTGVTGIAMTDTTPY     |
| ZIKV517 | KLRWLVERGYLQPYG     | ZIKV545 | RYGGGLVRVPLSRNS     | ZIKV573 | GIAMTDTTPYGGQQRV    |
| ZIKV518 | VERGYLQPYGKVIDL     | ZIKV546 | LVRVPLSRNSTHEMY     | ZIKV574 | DTTPYGGQQRVFKEKV    |
| ZIKV519 | LQPYGKVIDLGCGRG     | ZIKV547 | LSRNSTHEMYWVSGA     | ZIKV575 | GQQRVFKEKVDTRVP     |
| ZIKV520 | KVIDLGCGRGGWSYY     | ZIKV548 | THEMYWVSGAKSNTI     | ZIKV576 | FKEKVDTRVPDPQEG     |
| ZIKV521 | GCGRGGWSYYVATIR     | ZIKV549 | WVSGAKSNTIKSVST     | ZIKV577 | DTRVPDPQEGTRQVM     |
| ZIKV522 | GWSYYVATIRKQVEV     | ZIKV550 | KSNTIKSVSTTSQLL     | ZIKV578 | DPQEGTRQVMSMVSS     |
| ZIKV523 | VATIRKQVEVKGYTK     | ZIKV551 | KSVSTTSQLLGRMD      | ZIKV579 | TRQVMSMVSSWLWKE     |

| Peptide | Amino Acid Sequence | Peptide | Amino Acid Sequence | Peptide | Amino Acid Sequence |
|---------|---------------------|---------|---------------------|---------|---------------------|
| ZIKV580 | SMVSSWLWKELGKHK     | ZIKV608 | LGYVLEEMSRIPEGGR    | ZIKV636 | RLKRMAVSGDDCVVK     |
| ZIKV581 | WLWKELGKHKRPRVC     | ZIKV609 | EEMSRIPEGGRMYADD    | ZIKV637 | AVSGDDCVVKPIDDR     |
| ZIKV582 | LGKHKRPRVCTKEEF     | ZIKV610 | IPGGRMYADDTAGWD     | ZIKV638 | DCVVKPIDDRFAHAL     |
| ZIKV583 | RPRVCTKEEFINKVR     | ZIKV611 | MYADDTAGWDTRISR     | ZIKV639 | PIDDRFAHALRFLND     |
| ZIKV584 | TKEEFINKVRSNAAL     | ZIKV612 | TAGWDTRISRFLEN      | ZIKV640 | FAHALRFLNDMGKVR     |
| ZIKV585 | INKVRSNAALGAIFE     | ZIKV613 | TRISRFLENEALIT      | ZIKV641 | RFLNDMGKVRKDTQE     |
| ZIKV586 | SNAALGAIFEEKEW      | ZIKV614 | FDLENEALITNQMEK     | ZIKV642 | MGKVRKDTQEWKPS      |
| ZIKV587 | GAIFEEKEWKTAVE      | ZIKV615 | EALITNQMEKGHRAL     | ZIKV643 | KDTQEWKPSGWDNW      |
| ZIKV588 | EEKEWKTAVEAVNDP     | ZIKV616 | NQMEKGHRALALAI      | ZIKV644 | WKPSTGWDNWEEVPF     |
| ZIKV589 | KTAVEAVNDPRFWAL     | ZIKV617 | GHRALALAIKYTYQ      | ZIKV645 | GWDNWEEVPFCSHHF     |
| ZIKV590 | AVNDPRFWALVDKER     | ZIKV618 | ALAIKYTYQNKVVK      | ZIKV646 | EEVPFCSHHFNKLHL     |
| ZIKV591 | RFWALVDKEREHHLR     | ZIKV619 | KYTYQNKVVKVLRPA     | ZIKV647 | CSHHFNKLHLKDGRS     |
| ZIKV592 | VDKEREHHLRGECQS     | ZIKV620 | NKVVKVLRPAEKGKT     | ZIKV648 | NKLHLKDGRSIVVPC     |
| ZIKV593 | EHHLRGECQSCVYNM     | ZIKV621 | VLRPAEKGKTVMIDI     | ZIKV649 | KDGRSIVVPCRHQDE     |
| ZIKV594 | GECQSCVYNNMMGKRE    | ZIKV622 | EKGKTVMIDIQRDQ      | ZIKV650 | IVVPCRHQDELIGRA     |
| ZIKV595 | CVYNNMMGKREKQGE     | ZIKV623 | VMDIQRDQQRGSGQ      | ZIKV651 | RHQDELIGRARVSPG     |
| ZIKV596 | MGKREKQGEFGKAK      | ZIKV624 | SRQDQRGSGQVVTYA     | ZIKV652 | LIGRARVSPGAGWSI     |
| ZIKV597 | KKQGEFGKAKGSRAI     | ZIKV625 | RGSGQVVTYALNTFT     | ZIKV653 | RVSPGAGWSIRETAC     |
| ZIKV598 | FGKAKGSRAIWMWL      | ZIKV626 | VVTYALNTFTNLVVQ     | ZIKV654 | AGWSIRETACLAKSY     |
| ZIKV599 | GSRAIWMWLGARFL      | ZIKV627 | LNTFTNLVVQLIRNM     | ZIKV655 | RETAACLAKSYAQMWW    |
| ZIKV600 | WYMWLGARFLEFEAL     | ZIKV628 | NLNVQLIRNMEAEEV     | ZIKV656 | LAKSYAQMWWQLLYFH    |
| ZIKV601 | GARFLEFEALGFLNE     | ZIKV629 | LIRNMEAEEVLEMQD     | ZIKV657 | AQMWWQLLYFHRRDLR    |
| ZIKV602 | EFEALGFLNEDHWMG     | ZIKV630 | EAEVLEMQDLWLLR      | ZIKV658 | LLYFHRRDLRLMANA     |
| ZIKV603 | GFLNEDHWMGRENSG     | ZIKV631 | LEMQDLWLLRRSEKV     | ZIKV659 | RRDLRLMANAICSSV     |
| ZIKV604 | DHWMGRENSGGGVEG     | ZIKV632 | LWLLRRSEKVTNWLQ     | ZIKV660 | LMANAICSSVPVDWV     |
| ZIKV605 | RENSGGGVEGLGLQR     | ZIKV633 | RSEKVTNWLQSNQWD     | ZIKV661 | ICSSVPVDWVPTGRT     |
| ZIKV606 | GGVEGLGLQRLGYVL     | ZIKV634 | TNWLQSNQWDRLKRM     | ZIKV662 | PVDWVPTGRTTWSIH     |
| ZIKV607 | LGLQRLGYVLEEMSR     | ZIKV635 | SNGWDRLKRMAVSGD     | ZIKV663 | PTGRTTWSIHGKGEW     |

| <b>Peptide</b> | <b>Amino Acid Sequence</b> |
|----------------|----------------------------|
| ZIKV664        | TWSIHGKGEWMTTED            |
| ZIKV665        | GKGEWMTTEDMLVWV            |
| ZIKV666        | MTTEDMLVWVNRVWI            |
| ZIKV667        | MLVWVNRVWIEENDH            |
| ZIKV668        | NRVWIEENDHMEDKT            |
| ZIKV669        | EENDHMEDKTPVTKW            |
| ZIKV670        | MEDKTPVTKWTDIPY            |
| ZIKV671        | PVTKWTDIPYLGKRE            |
| ZIKV672        | TDIPYLGKREDLWCG            |
| ZIKV673        | LGKREDLWCGSLIGH            |
| ZIKV674        | DLWCGSLIGHRPRTT            |
| ZIKV675        | SLIGHRPRTTWAENI            |
| ZIKV676        | RPRTTWAENIKNTVN            |
| ZIKV677        | WAENIKNTVNMVRRRI           |
| ZIKV678        | KNTVNMVRRRIIGDEE           |
| ZIKV679        | MVRRRIIGDEEKYMDY           |
| ZIKV680        | IGDEEKYMDYLSTQV            |
| ZIKV681        | KYMDYLSTQVRYLGE            |
| ZIKV682        | LSTQVRYLGEEGSTP            |
| ZIKV683        | RYLGEEGSTPGVL              |
